# Supplementary material
Source: PubMed Central journal article supplement (PMC5410365)
Supplement: NIHMS828196-supplement-2.pdf [file NIHMS828196-supplement-2.pdf]

**Supplementary Table S6. RNA-seq results from HBEC-shp53 and HBEC-shp53-PCDH7 cells**

Genes highlighted in yellow were validated using quantitative real-time PCR.

Values represented are an average of 3 biological replicates for each sample.

| Gene           | Locus                       | Value_1         | Value_2         | Log2.fold_change | Test_stat      | p_value         | q_value          | significant |
|----------------|-----------------------------|-----------------|-----------------|------------------|----------------|-----------------|------------------|-------------|
| <b>PCDH7</b>   | <b>4:30722029-31148423</b>  | <b>7.53475</b>  | <b>2781.94</b>  | <b>8.52832</b>   | <b>33.9062</b> | <b>5.00E-05</b> | <b>0.0014988</b> | <b>yes</b>  |
| ZNF548         | 19:57901217-57913919        | 0.0983983       | 1.65835         | 4.07497          | 2.92663        | 0.0012          | 0.0202526        | yes         |
| KRT81          | 12:52679696-52685299        | 0.122142        | 0.987582        | 3.01534          | 3.99331        | 0.0011          | 0.0190409        | yes         |
| TLR4           | 9:120466452-120479769       | 0.378874        | 1.60219         | 2.08026          | 2.57946        | 5.00E-05        | 0.0014988        | yes         |
| VARS2          | 6:30881981-30894236         | 1.66878         | 7.04403         | 2.07761          | 2.53241        | 5.00E-05        | 0.0014988        | yes         |
| NNT            | 5:43573286-43705668         | 0.141645        | 0.568259        | 2.00427          | 3.1431         | 5.00E-05        | 0.0014988        | yes         |
| BIN1           | 2:127805598-127864903       | 1.09911         | 4.31225         | 1.9721           | 2.35887        | 7.00E-04        | 0.0135861        | yes         |
| LYPD6          | 2:150186498-150330662       | 0.26449         | 0.875356        | 1.72666          | 4.01511        | 5.00E-05        | 0.0014988        | yes         |
| STX16          | 20:57226308-57290900        | 1.74808         | 5.66542         | 1.69642          | 1.78814        | 0.00125         | 0.0209598        | yes         |
| ZNF704         | 8:81540685-81787016         | 0.178413        | 0.574972        | 1.68827          | 6.13676        | 5.00E-05        | 0.0014988        | yes         |
| ZNF90          | 19:20188802-20231977        | 0.375693        | 1.14703         | 1.61028          | 5.40363        | 5.00E-05        | 0.0014988        | yes         |
| KRTAP2-3       | 17:39215491-39216344        | 1.71304         | 5.22221         | 1.6081           | 5.8071         | 5.00E-05        | 0.0014988        | yes         |
| <b>FAM111B</b> | <b>11:58874657-58894888</b> | <b>6.11474</b>  | <b>18.5679</b>  | <b>1.60245</b>   | <b>4.54296</b> | <b>5.00E-05</b> | <b>0.0014988</b> | <b>yes</b>  |
| SERTAD4        | 1:210404803-210416460       | 0.362841        | 1.07535         | 1.5674           | 2.75945        | 3.00E-04        | 0.0068401        | yes         |
| SEZ6L2         | 16:29882479-29910585        | 0.870902        | 2.54751         | 1.54851          | 3.29636        | 5.00E-05        | 0.0014988        | yes         |
| PDE3B          | 11:14665268-14893605        | 0.25173         | 0.735085        | 1.54603          | 4.99864        | 5.00E-05        | 0.0014988        | yes         |
| MACC1          | 7:20174277-20257013         | 0.334726        | 0.97436         | 1.54148          | 5.85992        | 5.00E-05        | 0.0014988        | yes         |
| TMEM238        | 19:55890611-55895627        | 1.55785         | 4.45631         | 1.51629          | 6.45581        | 0.00255         | 0.0361588        | yes         |
| E2F2           | 1:23832919-23857712         | 0.291828        | 0.771958        | 1.4034           | 3.86399        | 5.00E-05        | 0.0014988        | yes         |
| ALOX5AP        | 13:31287614-31338565        | 0.800572        | 2.06965         | 1.37028          | 2.31884        | 1.00E-04        | 0.0027579        | yes         |
| ZNF93          | 19:20011721-20046382        | 0.421771        | 1.0777          | 1.35343          | 3.86329        | 5.00E-05        | 0.0014988        | yes         |
| <b>MAP2K6</b>  | <b>17:67410837-67538470</b> | <b>0.251194</b> | <b>0.631951</b> | <b>1.33101</b>   | <b>2.16726</b> | <b>0.0025</b>   | <b>0.0356451</b> | <b>yes</b>  |
| ATP6V0E2       | 7:149564782-149577787       | 0.805043        | 2.00937         | 1.31961          | 4.00905        | 5.00E-05        | 0.0014988        | yes         |
| <b>CDC25A</b>  | <b>3:48198667-48229801</b>  | <b>4.04379</b>  | <b>9.86377</b>  | <b>1.28643</b>   | <b>2.93402</b> | <b>5.00E-05</b> | <b>0.0014988</b> | <b>yes</b>  |
| IL7R           | 5:35856976-35879705         | 0.282125        | 0.685174        | 1.28014          | 3.49001        | 5.00E-05        | 0.0014988        | yes         |
| GGT7           | 20:33432522-33460661        | 0.477103        | 1.1434          | 1.26096          | 3.12383        | 5.00E-05        | 0.0014988        | yes         |
| TM7SF2         | 11:64879340-64883707        | 1.68064         | 4.02116         | 1.2586           | 4.74475        | 5.00E-05        | 0.0014988        | yes         |
| RNF38          | 9:36336396-36401195         | 1.23667         | 2.95778         | 1.25805          | 1.92895        | 0.00195         | 0.029568         | yes         |
| C1orf51        | 1:150255228-150259501       | 0.374081        | 0.891205        | 1.25241          | 2.4228         | 3.00E-04        | 0.0068401        | yes         |
| C21orf2        | 21:45748826-45759285        | 0.708204        | 1.66646         | 1.23455          | 1.82071        | 0.0021          | 0.031143         | yes         |

|                 |                        |          |          |         |         |          |           |     |
|-----------------|------------------------|----------|----------|---------|---------|----------|-----------|-----|
| <i>TLR4</i>     | 9:120466452-120479769  | 0.880389 | 2.06215  | 1.22794 | 2.19134 | 0.00205  | 0.0305767 | yes |
| <i>ZNF486</i>   | 19:20278022-20311299   | 0.730683 | 1.69845  | 1.2169  | 4.68747 | 5.00E-05 | 0.0014988 | yes |
| <i>CPA4</i>     | 7:129932973-129964020  | 4.07365  | 9.46885  | 1.21687 | 5.9173  | 5.00E-05 | 0.0014988 | yes |
| <i>AMH</i>      | 19:2249112-2252072     | 0.324499 | 0.750412 | 1.20947 | 2.4014  | 0.00115  | 0.0196005 | yes |
| <i>NFYA</i>     | 6:41040706-41108573    | 1.49286  | 3.44647  | 1.20704 | 1.97788 | 0.0028   | 0.0389566 | yes |
| <i>ID3</i>      | 1:23884420-23886285    | 9.99114  | 23.0562  | 1.20644 | 7.61511 | 5.00E-05 | 0.0014988 | yes |
| <i>GALNT12</i>  | 9:101569980-101612363  | 0.48981  | 1.11799  | 1.19061 | 3.35991 | 5.00E-05 | 0.0014988 | yes |
| <i>TPM2</i>     | 9:35681989-35690053    | 3.48949  | 7.9588   | 1.18954 | 3.28056 | 5.00E-05 | 0.0014988 | yes |
| <i>PRICKLE1</i> | 12:42852139-42983572   | 4.8026   | 10.9117  | 1.18398 | 5.91966 | 5.00E-05 | 0.0014988 | yes |
| <i>RFC5</i>     | 12:118454505-118470044 | 7.30576  | 16.5691  | 1.18139 | 2.21451 | 1.00E-04 | 0.0027579 | yes |
| <i>CCNE2</i>    | 8:95835533-95907482    | 5.57899  | 12.65    | 1.18106 | 3.06528 | 5.00E-05 | 0.0014988 | yes |
| <i>TMEM198</i>  | 2:220408744-220415317  | 0.270274 | 0.607754 | 1.16906 | 2.02033 | 0.0013   | 0.0216115 | yes |
| <i>TGM2</i>     | 20:36756862-36793700   | 58.2504  | 128.316  | 1.13936 | 4.88127 | 5.00E-05 | 0.0014988 | yes |
| <i>SLFN11</i>   | 17:33677323-33700720   | 0.652573 | 1.43181  | 1.13363 | 4.07613 | 5.00E-05 | 0.0014988 | yes |
| <i>GPRC5B</i>   | 16:19870292-19896151   | 0.329966 | 0.717988 | 1.12164 | 2.55263 | 0.00015  | 0.0038882 | yes |
| <i>GIMAP8</i>   | 7:150147961-150176483  | 0.509133 | 1.10779  | 1.12157 | 3.36252 | 5.00E-05 | 0.0014988 | yes |
| <i>DTL</i>      | 1:212113740-212278187  | 10.0444  | 21.8465  | 1.12101 | 4.84273 | 5.00E-05 | 0.0014988 | yes |
| <i>CTGF</i>     | 6:132269315-132272518  | 23.2945  | 50.3827  | 1.11294 | 7.37323 | 5.00E-05 | 0.0014988 | yes |
| <i>FOS</i>      | 14:75745480-75748937   | 16.4263  | 35.1146  | 1.09606 | 6.34835 | 5.00E-05 | 0.0014988 | yes |
| <i>FOXJ3</i>    | 1:42642209-42801548    | 3.37678  | 7.20272  | 1.09289 | 2.54441 | 5.00E-05 | 0.0014988 | yes |
| <i>C10orf10</i> | 10:45455218-45490172   | 1.32597  | 2.82334  | 1.09035 | 2.51523 | 5.00E-05 | 0.0014988 | yes |
| <i>REPIN1</i>   | 7:150065878-150071133  | 3.0168   | 6.40419  | 1.086   | 5.20719 | 5.00E-05 | 0.0014988 | yes |
| <i>KAT6B</i>    | 10:76586170-76792380   | 1.05207  | 2.17185  | 1.0457  | 2.24855 | 6.00E-04 | 0.0120833 | yes |
| <i>TRIM24</i>   | 7:138145078-138270333  | 1.42833  | 2.94342  | 1.04316 | 2.02067 | 0.0029   | 0.0399896 | yes |
| <i>CABLES1</i>  | 18:20714527-20840434   | 0.293006 | 0.60338  | 1.04214 | 2.05211 | 0.001    | 0.0178882 | yes |
| <i>EXO1</i>     | 1:242011492-242053241  | 6.53874  | 13.384   | 1.03343 | 4.57733 | 5.00E-05 | 0.0014988 | yes |
| <i>BCL2</i>     | 18:60790578-60986613   | 0.29406  | 0.6006   | 1.03029 | 2.25195 | 8.00E-04 | 0.0151114 | yes |
| <i>E2F8</i>     | 11:19245609-19263202   | 1.68674  | 3.43759  | 1.02716 | 4.7623  | 5.00E-05 | 0.0014988 | yes |
| <i>RAB3A</i>    | 19:18307610-18314874   | 0.804611 | 1.63371  | 1.02179 | 2.74696 | 0.00025  | 0.0059445 | yes |
| <i>CA9</i>      | 9:35673914-35681156    | 7.91221  | 16.0367  | 1.01922 | 5.48022 | 5.00E-05 | 0.0014988 | yes |
| <i>TFF1</i>     | 21:43782390-43786644   | 3.51624  | 7.12681  | 1.01922 | 4.02903 | 0.00025  | 0.0059445 | yes |
| <i>ZNF599</i>   | 19:35248978-35264134   | 0.358159 | 0.725222 | 1.01782 | 2.6897  | 0.00015  | 0.0038882 | yes |
| <i>SPRY1</i>    | 4:124317949-124324915  | 0.725167 | 1.4581   | 1.0077  | 2.73056 | 5.00E-05 | 0.0014988 | yes |
| <i>SMO</i>      | 7:128828712-128853386  | 0.372527 | 0.748685 | 1.00701 | 2.73261 | 5.00E-05 | 0.0014988 | yes |

|                  |                        |          |          |          |         |          |           |     |
|------------------|------------------------|----------|----------|----------|---------|----------|-----------|-----|
| <i>KIAA1244</i>  | 6:138483052-138665800  | 0.332074 | 0.665192 | 1.00227  | 4.17432 | 5.00E-05 | 0.0014988 | yes |
| <i>FBXO5</i>     | 6:153291657-153304740  | 10.936   | 21.8868  | 1.00097  | 4.31317 | 5.00E-05 | 0.0014988 | yes |
| <i>CAMK4</i>     | 5:110559946-110820749  | 1.38556  | 2.74155  | 0.98452  | 3.90774 | 5.00E-05 | 0.0014988 | yes |
| <i>CXXC5</i>     | 5:139028300-139062680  | 1.64197  | 3.21557  | 0.969647 | 3.52141 | 5.00E-05 | 0.0014988 | yes |
| <i>E2F1</i>      | 20:32263291-32274210   | 7.86825  | 15.3545  | 0.964544 | 4.75501 | 5.00E-05 | 0.0014988 | yes |
| <i>UNG</i>       | 12:109535398-109548798 | 16.7549  | 32.6579  | 0.962852 | 3.81362 | 5.00E-05 | 0.0014988 | yes |
| <i>PTGER4</i>    | 5:40680031-40693837    | 5.23751  | 10.1151  | 0.949562 | 5.65636 | 5.00E-05 | 0.0014988 | yes |
| <i>EFHC1</i>     | 6:52284993-52360583    | 0.896903 | 1.72795  | 0.946037 | 2.50269 | 1.00E-04 | 0.0027579 | yes |
| <i>SDSL</i>      | 12:113860215-113876081 | 0.955733 | 1.841    | 0.945814 | 2.52797 | 2.00E-04 | 0.004937  | yes |
| <i>NEBL</i>      | 10:21068901-21463852   | 0.420242 | 0.805105 | 0.937957 | 2.72009 | 0.00015  | 0.0038882 | yes |
| <i>MCAM</i>      | 11:119179233-119187840 | 0.83316  | 1.58959  | 0.93199  | 3.33196 | 5.00E-05 | 0.0014988 | yes |
| <i>ENPP1</i>     | 6:132129155-132216295  | 0.416666 | 0.794261 | 0.930722 | 3.52146 | 5.00E-05 | 0.0014988 | yes |
| <i>KRT23</i>     | 17:39078951-39093836   | 0.731101 | 1.39178  | 0.928793 | 2.61925 | 5.00E-05 | 0.0014988 | yes |
| <i>SEMA4D</i>    | 9:91975705-92094611    | 0.603241 | 1.14771  | 0.927947 | 2.55573 | 0.00015  | 0.0038882 | yes |
| <i>FAM13B</i>    | 5:137225124-137373321  | 2.9334   | 5.54591  | 0.91885  | 2.05795 | 0.00185  | 0.0285536 | yes |
| <i>CHSY3</i>     | 5:129240522-129522327  | 0.730245 | 1.37831  | 0.916442 | 3.21184 | 5.00E-05 | 0.0014988 | yes |
| <i>FZD1</i>      | 7:90893782-90898132    | 1.17642  | 2.21888  | 0.915431 | 4.44712 | 5.00E-05 | 0.0014988 | yes |
| <i>ZNF367</i>    | 9:99148222-99180669    | 4.34046  | 8.17787  | 0.913877 | 5.67324 | 5.00E-05 | 0.0014988 | yes |
| <i>NR2F1</i>     | 5:92919042-92929788    | 0.449842 | 0.846025 | 0.91128  | 2.8272  | 0.00065  | 0.0128896 | yes |
| <i>SPPL2B</i>    | 19:2328628-2355100     | 1.91132  | 3.59156  | 0.910046 | 2.12192 | 8.00E-04 | 0.0151114 | yes |
| <i>CTSH</i>      | 15:79214091-79237420   | 9.18982  | 17.2685  | 0.910037 | 5.16752 | 5.00E-05 | 0.0014988 | yes |
| <i>STAC</i>      | 3:36422096-36589496    | 1.43847  | 2.70277  | 0.909903 | 3.80055 | 5.00E-05 | 0.0014988 | yes |
| <i>ELAC1</i>     | 18:48494386-48514490   | 1.3723   | 2.55629  | 0.897459 | 3.21626 | 5.00E-05 | 0.0014988 | yes |
| <i>EGLN3</i>     | 14:34393420-34420284   | 2.4714   | 4.59708  | 0.895392 | 4.40363 | 5.00E-05 | 0.0014988 | yes |
| <i>PMP22</i>     | 17:15133095-15168644   | 0.866476 | 1.6083   | 0.892305 | 2.09749 | 1.00E-04 | 0.0027579 | yes |
| <i>SLC12A7</i>   | 5:1050488-1112172      | 0.801457 | 1.4865   | 0.891226 | 3.57142 | 5.00E-05 | 0.0014988 | yes |
| <i>PLAGL1</i>    | 6:144261436-144385735  | 2.25846  | 4.18037  | 0.888291 | 2.97539 | 5.00E-05 | 0.0014988 | yes |
| <i>BTBD11</i>    | 12:107712196-108053419 | 1.32369  | 2.44049  | 0.882604 | 2.17301 | 0.00105  | 0.0185265 | yes |
| <i>C16orf59</i>  | 16:2510114-2514964     | 3.61288  | 6.65275  | 0.880801 | 4.34915 | 5.00E-05 | 0.0014988 | yes |
| <i>ZNF718</i>    | 4:124419-156491        | 2.01882  | 3.69777  | 0.873142 | 4.00268 | 5.00E-05 | 0.0014988 | yes |
| <i>TNFRSF11A</i> | 18:59992519-60054943   | 0.359928 | 0.65897  | 0.872507 | 2.4376  | 5.00E-05 | 0.0014988 | yes |
| <i>SIVA1</i>     | 14:105219469-105225996 | 41.5822  | 75.8623  | 0.867419 | 4.58066 | 5.00E-05 | 0.0014988 | yes |
| <i>ADM</i>       | 11:10326641-10328923   | 15.0937  | 27.5224  | 0.866662 | 5.48112 | 5.00E-05 | 0.0014988 | yes |
| <i>ZNF782</i>    | 9:99579272-99616389    | 0.555587 | 1.00723  | 0.858305 | 2.74797 | 5.00E-05 | 0.0014988 | yes |

|                 |                        |          |          |          |         |          |           |     |
|-----------------|------------------------|----------|----------|----------|---------|----------|-----------|-----|
| <i>SCARB1</i>   | 12:125262173-125348519 | 23.2461  | 42.1004  | 0.856846 | 2.5062  | 5.00E-05 | 0.0014988 | yes |
| <i>APLN</i>     | X:128779235-128788933  | 0.47161  | 0.852998 | 0.85495  | 2.28884 | 5.00E-05 | 0.0014988 | yes |
| <i>TMOD2</i>    | 15:52043757-52108560   | 0.999955 | 1.80289  | 0.850376 | 4.26302 | 5.00E-05 | 0.0014988 | yes |
| <i>ITGB8</i>    | 7:20370724-20455382    | 0.582837 | 1.04962  | 0.848697 | 4.04187 | 5.00E-05 | 0.0014988 | yes |
| <i>ATAD2</i>    | 8:124332089-124408705  | 16.5584  | 29.8089  | 0.848179 | 4.97288 | 5.00E-05 | 0.0014988 | yes |
| <i>ORC1</i>     | 1:52838500-52870143    | 4.59378  | 8.26112  | 0.846655 | 2.87379 | 5.00E-05 | 0.0014988 | yes |
| <i>SLC6A8</i>   | X:152953751-152962048  | 7.2088   | 12.8977  | 0.839279 | 1.93935 | 5.00E-04 | 0.0104629 | yes |
| <i>EYA2</i>     | 20:45523262-45817492   | 2.50075  | 4.46916  | 0.837642 | 3.56548 | 5.00E-05 | 0.0014988 | yes |
| <i>GINS2</i>    | 16:85711279-85722588   | 21.1823  | 37.8469  | 0.837319 | 4.70429 | 5.00E-05 | 0.0014988 | yes |
| <i>C4orf48</i>  | 4:2043719-2045697      | 16.4939  | 29.4642  | 0.837034 | 2.93421 | 0.00025  | 0.0059445 | yes |
| <i>TCF19</i>    | 6:31126302-31131992    | 11.8823  | 21.1648  | 0.832849 | 4.06399 | 5.00E-05 | 0.0014988 | yes |
| <i>FAM111B</i>  | 11:58874657-58894888   | 7.52447  | 13.388   | 0.831282 | 2.52581 | 2.00E-04 | 0.004937  | yes |
| <i>WDR76</i>    | 15:44119111-44160617   | 6.96822  | 12.3927  | 0.830629 | 4.56204 | 5.00E-05 | 0.0014988 | yes |
| <i>RAB27B</i>   | 18:52495707-52562747   | 2.04949  | 3.63039  | 0.824857 | 4.80154 | 5.00E-05 | 0.0014988 | yes |
| <i>SDC2</i>     | 8:97505881-97624037    | 0.553613 | 0.973333 | 0.814055 | 2.78528 | 2.00E-04 | 0.004937  | yes |
| <i>ASF1B</i>    | 19:14230320-14247440   | 16.1405  | 28.3463  | 0.812478 | 4.61859 | 5.00E-05 | 0.0014988 | yes |
| <i>ANGPTL4</i>  | 19:8429010-8439257     | 21.9923  | 38.6231  | 0.812469 | 2.98847 | 5.00E-05 | 0.0014988 | yes |
| <i>TMEM97</i>   | 17:26646120-26662515   | 14.4518  | 25.3446  | 0.810433 | 3.79386 | 5.00E-05 | 0.0014988 | yes |
| <i>MPP2</i>     | 17:41952726-41985113   | 0.798515 | 1.3971   | 0.807045 | 2.92882 | 5.00E-05 | 0.0014988 | yes |
| <i>CDC6</i>     | 17:38444145-38459413   | 20.9718  | 36.65    | 0.805364 | 4.31042 | 5.00E-05 | 0.0014988 | yes |
| <i>CHCHD10</i>  | 22:24105207-24110141   | 16.3966  | 28.6174  | 0.8035   | 4.17094 | 5.00E-05 | 0.0014988 | yes |
| <i>SOX2</i>     | 3:181328150-181459009  | 0.831177 | 1.44942  | 0.802248 | 2.45804 | 2.00E-04 | 0.004937  | yes |
| <i>TGFB2</i>    | 1:218517537-218617961  | 3.85182  | 6.68818  | 0.796073 | 3.54607 | 5.00E-05 | 0.0014988 | yes |
| <i>HS3ST2</i>   | 16:22825859-22927659   | 4.35433  | 7.5516   | 0.79433  | 4.38397 | 5.00E-05 | 0.0014988 | yes |
| <i>SLC25A10</i> | 17:79679265-79688046   | 6.67051  | 11.566   | 0.794016 | 2.86252 | 5.00E-05 | 0.0014988 | yes |
| <i>RAD54B</i>   | 8:95384187-95487343    | 3.72955  | 6.43868  | 0.787763 | 2.87121 | 5.00E-05 | 0.0014988 | yes |
| <i>CTXN1</i>    | 19:7989380-7991051     | 3.22897  | 5.57031  | 0.786683 | 3.75017 | 5.00E-05 | 0.0014988 | yes |
| <i>CDT1</i>     | 16:88870185-88875666   | 8.28369  | 14.2796  | 0.785614 | 3.90523 | 5.00E-05 | 0.0014988 | yes |
| <i>PCSK1N</i>   | X:48689505-48693960    | 3.7469   | 6.43942  | 0.781234 | 3.94927 | 5.00E-05 | 0.0014988 | yes |
| <i>PODXL2</i>   | 3:127348038-127391652  | 0.988697 | 1.6973   | 0.779643 | 2.49155 | 5.00E-05 | 0.0014988 | yes |
| <i>C1orf233</i> | 1:1533387-1535476      | 3.57405  | 6.1271   | 0.777643 | 4.19793 | 5.00E-05 | 0.0014988 | yes |
| <i>C11orf75</i> | 11:93211637-93276546   | 1.73838  | 2.97576  | 0.77552  | 2.50513 | 7.00E-04 | 0.0135861 | yes |
| <i>CCNE1</i>    | 19:30302900-30315215   | 3.57287  | 6.11566  | 0.775423 | 3.93071 | 5.00E-05 | 0.0014988 | yes |
| <i>CLSPN</i>    | 1:36197712-36235551    | 4.933    | 8.43528  | 0.77397  | 3.75713 | 5.00E-05 | 0.0014988 | yes |

|                    |                            |                |                |                 |                |                 |                  |            |
|--------------------|----------------------------|----------------|----------------|-----------------|----------------|-----------------|------------------|------------|
| <i>CA11</i>        | 19:49141271-49185502       | 1.22521        | 2.09407        | 0.77328         | 2.0895         | 0.00035         | 0.0077304        | yes        |
| <i>SFRP1</i>       | 8:41119475-41166990        | 20.7411        | 35.3095        | 0.767564        | 3.93812        | 5.00E-05        | 0.0014988        | yes        |
| <i>TMSB15B</i>     | X:103217199-103220563      | 2.42812        | 4.12753        | 0.765441        | 2.54346        | 0.00205         | 0.0305767        | yes        |
| <i>KRT15</i>       | 17:39669996-39675270       | 12.5557        | 21.2794        | 0.761117        | 3.38752        | 5.00E-05        | 0.0014988        | yes        |
| <i>TMEM201</i>     | 1:9648931-9674935          | 1.79512        | 3.03554        | 0.757876        | 1.88022        | 0.0014          | 0.0230273        | yes        |
| <i>ZDHHC23</i>     | 3:113666747-113681829      | 0.744168       | 1.25522        | 0.754239        | 2.61213        | 5.00E-05        | 0.0014988        | yes        |
| <i>RFC3</i>        | 13:34392205-34540695       | 13.3228        | 22.4474        | 0.752646        | 3.2386         | 5.00E-05        | 0.0014988        | yes        |
| <i>ADAMTS1</i>     | 21:28208605-28217728       | 9.87181        | 16.6096        | 0.750631        | 3.97846        | 5.00E-05        | 0.0014988        | yes        |
| <i>UBR7</i>        | 14:93669236-93695561       | 7.5881         | 12.7606        | 0.749889        | 2.98963        | 5.00E-05        | 0.0014988        | yes        |
| <i>HELLS</i>       | 10:96305573-96361856       | 11.1365        | 18.6968        | 0.747491        | 4.53611        | 5.00E-05        | 0.0014988        | yes        |
| <i>COL8A1</i>      | 3:99357439-99515577        | 3.99742        | 6.7057         | 0.746319        | 3.17182        | 5.00E-05        | 0.0014988        | yes        |
| <i>ZNF703</i>      | 8:37553300-37556396        | 3.2975         | 5.51325        | 0.741529        | 5.07023        | 5.00E-05        | 0.0014988        | yes        |
| <i>CREG1</i>       | 1:167510249-167523056      | 21.5635        | 35.9722        | 0.738289        | 4.93608        | 5.00E-05        | 0.0014988        | yes        |
| <i>PIAS2</i>       | 18:44390021-44497495       | 2.94538        | 4.90994        | 0.737254        | 2.97689        | 5.00E-05        | 0.0014988        | yes        |
| <i>ZNF22</i>       | 10:45493145-45500777       | 3.20622        | 5.32054        | 0.7307          | 3.51117        | 5.00E-05        | 0.0014988        | yes        |
| <i>COL5A1</i>      | 9:137533651-137736689      | 0.347874       | 0.576707       | 0.729275        | 2.52632        | 5.00E-05        | 0.0014988        | yes        |
| <i>SNCG</i>        | 10:88718287-88723017       | 5.67124        | 9.39156        | 0.727701        | 3.28922        | 5.00E-05        | 0.0014988        | yes        |
| <i>DHRS3</i>       | 1:12627938-12677820        | 5.47134        | 9.05735        | 0.727196        | 3.88553        | 5.00E-05        | 0.0014988        | yes        |
| <i>THEM6</i>       | 8:143808620-143818350      | 3.60466        | 5.96398        | 0.726414        | 3.62023        | 5.00E-05        | 0.0014988        | yes        |
| <i>ATP8B1</i>      | 18:55297533-55470327       | 2.96609        | 4.90379        | 0.725332        | 3.41807        | 5.00E-05        | 0.0014988        | yes        |
| <i>GIT2</i>        | 12:110367606-110434194     | 3.57142        | 5.90407        | 0.725214        | 1.84385        | 0.0016          | 0.025428         | yes        |
| <b><i>SKP2</i></b> | <b>5:36152144-36184143</b> | <b>8.81767</b> | <b>14.5051</b> | <b>0.718092</b> | <b>2.72281</b> | <b>5.00E-05</b> | <b>0.0014988</b> | <b>yes</b> |
| <i>LIF</i>         | 22:30636435-30642840       | 2.31744        | 3.80905        | 0.716899        | 2.9258         | 5.00E-05        | 0.0014988        | yes        |
| <i>CCND3</i>       | 6:41902670-42016610        | 12.4655        | 20.4878        | 0.716819        | 2.27242        | 0.00015         | 0.0038882        | yes        |
| <i>RMI1</i>        | 9:86595636-86618989        | 5.04547        | 8.26941        | 0.712796        | 4.24314        | 5.00E-05        | 0.0014988        | yes        |
| <i>ZNF443</i>      | 19:12540519-12551926       | 0.569263       | 0.932606       | 0.712171        | 2.13306        | 0.0028          | 0.0389566        | yes        |
| <i>MCM6</i>        | 2:136597195-136634047      | 23.864         | 39.0651        | 0.711046        | 4.01449        | 5.00E-05        | 0.0014988        | yes        |
| <i>CBFB</i>        | 16:67063049-67134961       | 8.40432        | 13.735         | 0.708651        | 2.06256        | 0.00115         | 0.0196005        | yes        |
| <i>RGL1</i>        | 1:183605207-183897666      | 0.690498       | 1.12708        | 0.706881        | 2.60659        | 5.00E-05        | 0.0014988        | yes        |
| <i>SPAG4</i>       | 20:34203808-34208965       | 3.08083        | 5.0256         | 0.705977        | 3.22657        | 5.00E-05        | 0.0014988        | yes        |
| <i>PGAM5</i>       | 12:133287392-133299323     | 7.95846        | 12.9558        | 0.703036        | 1.65927        | 0.00385         | 0.0490393        | yes        |
| <i>GLCC1</i>       | 7:8008373-8128710          | 1.01781        | 1.65503        | 0.701381        | 3.21586        | 5.00E-05        | 0.0014988        | yes        |
| <i>FAM82A1</i>     | 2:38152461-38294285        | 1.74414        | 2.83477        | 0.700711        | 2.65848        | 0.00025         | 0.0059445        | yes        |
| <i>MT1E</i>        | 16:56659584-56661024       | 298.017        | 483.813        | 0.699055        | 6.63113        | 5.00E-05        | 0.0014988        | yes        |

|                    |                            |                |                |                 |                |                 |                  |            |
|--------------------|----------------------------|----------------|----------------|-----------------|----------------|-----------------|------------------|------------|
| <i>SAA1</i>        | 11:18287807-18291524       | 11.0177        | 17.8768        | 0.698265        | 2.40818        | 5.00E-05        | 0.0014988        | yes        |
| <i>INSR</i>        | 19:7112265-7294011         | 0.468322       | 0.75881        | 0.696238        | 2.68711        | 5.00E-05        | 0.0014988        | yes        |
| <i>RASSF4</i>      | 10:45455218-45490172       | 1.45926        | 2.35848        | 0.692618        | 2.07815        | 7.00E-04        | 0.0135861        | yes        |
| <i>HES1</i>        | 3:193853930-193856401      | 58.7372        | 94.7671        | 0.690111        | 5.23073        | 5.00E-05        | 0.0014988        | yes        |
| <i>BRIP1</i>       | 17:59756546-59940920       | 3.31211        | 5.3409         | 0.689332        | 3.80719        | 5.00E-05        | 0.0014988        | yes        |
| <i>CYP2U1</i>      | 4:108852716-108874613      | 0.638555       | 1.0289         | 0.688225        | 2.52763        | 1.00E-04        | 0.0027579        | yes        |
| <i>AGR2</i>        | 7:16832263-16844738        | 8.02402        | 12.9171        | 0.686882        | 3.50001        | 5.00E-05        | 0.0014988        | yes        |
| <i>ALG10</i>       | 12:34175215-34181237       | 1.10908        | 1.78167        | 0.683869        | 2.8626         | 5.00E-05        | 0.0014988        | yes        |
| <i>DISP1</i>       | 1:222988430-223179337      | 0.59626        | 0.957649       | 0.683556        | 2.45666        | 5.00E-05        | 0.0014988        | yes        |
| <b><i>MCM3</i></b> | <b>6:52128811-52149679</b> | <b>47.6877</b> | <b>76.5113</b> | <b>0.682056</b> | <b>3.25365</b> | <b>5.00E-05</b> | <b>0.0014988</b> | <b>yes</b> |
| <i>ZNF100</i>      | 19:21906842-21950430       | 1.15823        | 1.85712        | 0.681137        | 3.28956        | 5.00E-05        | 0.0014988        | yes        |
| <i>NPDC1</i>       | 9:139933908-139940676      | 11.9547        | 19.1672        | 0.681067        | 4.25676        | 5.00E-05        | 0.0014988        | yes        |
| <i>LRR1</i>        | 14:50065414-50081390       | 9.14226        | 14.6336        | 0.678665        | 2.90023        | 5.00E-05        | 0.0014988        | yes        |
| <i>RBM14</i>       | 11:66384052-66445275       | 8.67878        | 13.8913        | 0.678613        | 2.11409        | 3.00E-04        | 0.0068401        | yes        |
| <i>SLC43A3</i>     | 11:57174426-57195053       | 7.17245        | 11.4541        | 0.675323        | 3.33176        | 5.00E-05        | 0.0014988        | yes        |
| <i>HSPA8</i>       | 11:122928199-122932901     | 830.592        | 1325.84        | 0.674698        | 3.20529        | 5.00E-05        | 0.0014988        | yes        |
| <i>USP37</i>       | 2:219314973-219433084      | 3.03839        | 4.84908        | 0.674405        | 3.48919        | 5.00E-05        | 0.0014988        | yes        |
| <i>MNS1</i>        | 15:56657643-56757335       | 3.76883        | 6.00435        | 0.671893        | 3.21594        | 5.00E-05        | 0.0014988        | yes        |
| <i>DPF3</i>        | 14:73136659-73360809       | 0.864619       | 1.37594        | 0.670282        | 2.06878        | 9.00E-04        | 0.0166758        | yes        |
| <i>AK4</i>         | 1:65613231-65697828        | 9.89482        | 15.7426        | 0.66993         | 3.72031        | 5.00E-05        | 0.0014988        | yes        |
| <i>SPATA6</i>      | 1:48761043-48937876        | 0.484646       | 0.770621       | 0.669089        | 2.41867        | 0.001           | 0.0178882        | yes        |
| <i>PCLO</i>        | 7:82383320-82792197        | 0.369827       | 0.587995       | 0.668951        | 3.06021        | 5.00E-05        | 0.0014988        | yes        |
| <i>TMEM180</i>     | 10:104221169-104236802     | 0.874195       | 1.38923        | 0.668254        | 2.30958        | 4.00E-04        | 0.0086622        | yes        |
| <i>ICA1</i>        | 7:8152813-8302451          | 1.59683        | 2.53759        | 0.668245        | 2.37828        | 0.00055         | 0.0112366        | yes        |
| <i>VASH1</i>       | 14:77228234-77249363       | 0.533072       | 0.846865       | 0.667802        | 2.24171        | 5.00E-05        | 0.0014988        | yes        |
| <i>RBL1</i>        | 20:35626177-35724410       | 6.26067        | 9.9407         | 0.667029        | 2.25113        | 3.00E-04        | 0.0068401        | yes        |
| <i>CACHD1</i>      | 1:64936475-65158741        | 1.15152        | 1.8262         | 0.665305        | 2.79076        | 5.00E-05        | 0.0014988        | yes        |
| <i>PRRT3</i>       | 3:9987225-9996471          | 0.526276       | 0.834531       | 0.665147        | 2.04115        | 0.0011          | 0.0190409        | yes        |
| <i>IER5L</i>       | 9:131937830-131940540      | 2.96253        | 4.69135        | 0.663174        | 3.82786        | 5.00E-05        | 0.0014988        | yes        |
| <i>RDH10</i>       | 8:74206836-74237520        | 2.2655         | 3.58734        | 0.663086        | 3.56462        | 5.00E-05        | 0.0014988        | yes        |
| <i>TFRC</i>        | 3:195776154-195809032      | 23.3484        | 36.9181        | 0.661008        | 3.71037        | 5.00E-05        | 0.0014988        | yes        |
| <i>PCNA</i>        | 20:5095598-5107268         | 184.775        | 291.691        | 0.658673        | 4.19559        | 5.00E-05        | 0.0014988        | yes        |
| <i>ATAD5</i>       | 17:29159019-29222295       | 2.12654        | 3.35625        | 0.658342        | 3.97656        | 5.00E-05        | 0.0014988        | yes        |
| <i>TICRR</i>       | 15:90118817-90198682       | 3.35466        | 5.28061        | 0.654537        | 3.21885        | 5.00E-05        | 0.0014988        | yes        |

|                 |                       |          |          |          |         |          |           |     |
|-----------------|-----------------------|----------|----------|----------|---------|----------|-----------|-----|
| <i>C9orf40</i>  | 9:77561498-77567802   | 3.17016  | 4.98894  | 0.654179 | 3.53214 | 5.00E-05 | 0.0014988 | yes |
| <i>CDCA7</i>    | 2:174219560-174233718 | 19.2463  | 30.2487  | 0.652294 | 2.75872 | 5.00E-05 | 0.0014988 | yes |
| <i>POLE2</i>    | 14:50110269-50155098  | 6.15106  | 9.64361  | 0.648738 | 2.30624 | 2.00E-04 | 0.004937  | yes |
| <i>BARD1</i>    | 2:215593261-215674428 | 4.15537  | 6.50922  | 0.647507 | 3.84267 | 5.00E-05 | 0.0014988 | yes |
| <i>FOXQ1</i>    | 6:1312674-1314993     | 1.30164  | 2.03341  | 0.643572 | 2.95486 | 0.0011   | 0.0190409 | yes |
| <i>DPYSL2</i>   | 8:26371708-26515693   | 4.9564   | 7.74281  | 0.643564 | 1.8525  | 0.00105  | 0.0185265 | yes |
| <i>MMS22L</i>   | 6:97590036-97731052   | 2.81135  | 4.39052  | 0.643131 | 3.40405 | 5.00E-05 | 0.0014988 | yes |
| <i>SLC2A8</i>   | 9:130159464-130170161 | 2.54018  | 3.96179  | 0.641224 | 2.87604 | 5.00E-05 | 0.0014988 | yes |
| <i>TDRD7</i>    | 9:100174301-100258407 | 1.19223  | 1.8589   | 0.640784 | 2.75481 | 5.00E-05 | 0.0014988 | yes |
| <i>TMEM201</i>  | 1:9648931-9674935     | 2.93481  | 4.57426  | 0.64027  | 2.15298 | 0.00055  | 0.0112366 | yes |
| <i>MAGEH1</i>   | X:55478537-55479999   | 2.01643  | 3.14148  | 0.639639 | 2.56542 | 0.00045  | 0.0095063 | yes |
| <i>TMEM194A</i> | 12:57449425-57472574  | 7.62905  | 11.8472  | 0.634975 | 2.75598 | 5.00E-05 | 0.0014988 | yes |
| <i>MCM2</i>     | 3:127317252-127341279 | 26.4298  | 40.9862  | 0.632975 | 3.35671 | 5.00E-05 | 0.0014988 | yes |
| <i>KHDRBS3</i>  | 8:136469715-136659849 | 2.6764   | 4.14204  | 0.630048 | 2.95366 | 5.00E-05 | 0.0014988 | yes |
| <i>TMEM45A</i>  | 3:100211462-100296285 | 10.9188  | 16.8916  | 0.629502 | 3.61079 | 5.00E-05 | 0.0014988 | yes |
| <i>SLC25A19</i> | 17:73267379-73285530  | 4.02634  | 6.22708  | 0.629086 | 2.26333 | 5.00E-05 | 0.0014988 | yes |
| <i>DNA2</i>     | 10:70173820-70231730  | 3.84504  | 5.94261  | 0.628099 | 3.47885 | 5.00E-05 | 0.0014988 | yes |
| <i>ACPL2</i>    | 3:140950681-141013486 | 0.952139 | 1.46984  | 0.626416 | 2.2118  | 0.00065  | 0.0128896 | yes |
| <i>SLFN13</i>   | 17:33762114-33775856  | 0.382679 | 0.590262 | 0.62522  | 2.22052 | 0.00015  | 0.0038882 | yes |
| <i>RNASET2</i>  | 6:167343003-167370077 | 5.6221   | 8.66582  | 0.624228 | 3.47193 | 5.00E-05 | 0.0014988 | yes |
| <i>MCAT</i>     | 22:43528211-43539403  | 5.21345  | 8.02417  | 0.622112 | 2.4654  | 5.00E-05 | 0.0014988 | yes |
| <i>GMNN</i>     | 6:24775158-24786327   | 33.2108  | 51.0561  | 0.62043  | 3.39549 | 5.00E-05 | 0.0014988 | yes |
| <i>SLAMF7</i>   | 1:160709076-160724601 | 0.6072   | 0.933177 | 0.61998  | 1.68567 | 0.00345  | 0.0452052 | yes |
| <i>AP1S2</i>    | X:15843928-15873100   | 5.13054  | 7.88158  | 0.619373 | 3.67948 | 5.00E-05 | 0.0014988 | yes |
| <i>KBTBD8</i>   | 3:67048726-67061634   | 0.586523 | 0.900799 | 0.619017 | 2.31672 | 0.00105  | 0.0185265 | yes |
| <i>CA2</i>      | 8:86376130-86393721   | 8.16216  | 12.5222  | 0.617471 | 3.62794 | 5.00E-05 | 0.0014988 | yes |
| <i>GPC4</i>     | X:132435063-132549205 | 0.697692 | 1.06992  | 0.616846 | 2.04216 | 0.00065  | 0.0128896 | yes |
| <i>SAMHD1</i>   | 20:35504569-35580246  | 6.95555  | 10.6478  | 0.614317 | 3.09192 | 5.00E-05 | 0.0014988 | yes |
| <i>PLOD2</i>    | 3:145787226-145879282 | 65.3482  | 100.033  | 0.614258 | 2.42406 | 5.00E-05 | 0.0014988 | yes |
| <i>GSTCD</i>    | 4:106629940-106768882 | 5.08448  | 7.76313  | 0.610539 | 2.23594 | 0.00015  | 0.0038882 | yes |
| <i>ZNF180</i>   | 19:44979855-45004574  | 2.69308  | 4.10922  | 0.60961  | 3.09132 | 5.00E-05 | 0.0014988 | yes |
| <i>CHAF1B</i>   | 21:37757688-37789125  | 12.8373  | 19.5435  | 0.60635  | 3.42545 | 5.00E-05 | 0.0014988 | yes |
| <i>MARVELD3</i> | 16:71660055-71675868  | 2.89365  | 4.40084  | 0.604889 | 1.77333 | 0.00165  | 0.0260097 | yes |
| <i>PIGQ</i>     | 16:619967-634136      | 5.83684  | 8.8649   | 0.602917 | 2.08543 | 7.00E-04 | 0.0135861 | yes |

|                   |                       |          |         |          |         |          |           |     |
|-------------------|-----------------------|----------|---------|----------|---------|----------|-----------|-----|
| <i>KRT75</i>      | 12:52817853-52828110  | 2.24555  | 3.4049  | 0.600546 | 2.35438 | 5.00E-05 | 0.0014988 | yes |
| <i>SLIT2</i>      | 4:20255234-20620788   | 2.09485  | 3.17637 | 0.600529 | 3.00848 | 5.00E-05 | 0.0014988 | yes |
| <i>MCM5</i>       | 22:35796115-35820495  | 33.2948  | 50.4549 | 0.5997   | 3.21771 | 5.00E-05 | 0.0014988 | yes |
| <i>GLI3</i>       | 7:42000546-42276618   | 1.37613  | 2.08508 | 0.599489 | 3.2034  | 5.00E-05 | 0.0014988 | yes |
| <i>METRN</i>      | 16:765172-767480      | 21.2818  | 32.1985 | 0.597374 | 4.96106 | 5.00E-05 | 0.0014988 | yes |
| <i>LIMCH1</i>     | 4:41362803-41702061   | 3.80909  | 5.75927 | 0.59644  | 2.63753 | 5.00E-05 | 0.0014988 | yes |
| <i>CYGB</i>       | 17:74523429-74541458  | 10.8757  | 16.4246 | 0.594756 | 2.81895 | 5.00E-05 | 0.0014988 | yes |
| <i>SGK223</i>     | 8:8175257-8239257     | 5.16098  | 7.79139 | 0.594235 | 3.1767  | 5.00E-05 | 0.0014988 | yes |
| <i>SCML1</i>      | X:17755591-17773105   | 5.11852  | 7.72659 | 0.594105 | 2.75164 | 2.00E-04 | 0.004937  | yes |
| <i>DSEL</i>       | 18:65173818-65566856  | 1.18163  | 1.78291 | 0.593452 | 3.1074  | 5.00E-05 | 0.0014988 | yes |
| <i>PRIM1</i>      | 12:57125363-57146146  | 19.4481  | 29.33   | 0.59275  | 3.81091 | 5.00E-05 | 0.0014988 | yes |
| <i>EGLN1</i>      | 1:231499496-231560790 | 7.11699  | 10.6969 | 0.587848 | 3.75704 | 5.00E-05 | 0.0014988 | yes |
| <i>POLA1</i>      | X:24712063-25015103   | 6.63079  | 9.95559 | 0.586327 | 2.97402 | 5.00E-05 | 0.0014988 | yes |
| <i>SVIP</i>       | 11:22843597-22851382  | 10.0241  | 15.0338 | 0.584736 | 3.83552 | 5.00E-05 | 0.0014988 | yes |
| <i>ERVMER34-1</i> | 4:53609683-53617807   | 2.77086  | 4.14709 | 0.581767 | 2.82342 | 5.00E-05 | 0.0014988 | yes |
| <i>BLM</i>        | 15:91260578-91358686  | 5.66732  | 8.48155 | 0.581661 | 3.28247 | 5.00E-05 | 0.0014988 | yes |
| <i>CLN6</i>       | 15:68499329-68522080  | 10.5916  | 15.8389 | 0.580557 | 2.90132 | 5.00E-05 | 0.0014988 | yes |
| <i>CHAF1A</i>     | 19:4402659-4443394    | 16.6072  | 24.8324 | 0.580417 | 2.94967 | 5.00E-05 | 0.0014988 | yes |
| <i>MME</i>        | 3:154797435-154901518 | 3.60768  | 5.39007 | 0.579233 | 3.06552 | 5.00E-05 | 0.0014988 | yes |
| <i>CPVL</i>       | 7:29019582-29186153   | 2.05405  | 3.0655  | 0.577648 | 2.00212 | 0.00035  | 0.0077304 | yes |
| <i>CDKN2A</i>     | 9:21967137-21994490   | 80.1267  | 119.385 | 0.575269 | 1.83581 | 0.0029   | 0.0399896 | yes |
| <i>TSEN54</i>     | 17:73512608-73520820  | 5.97905  | 8.90211 | 0.574231 | 2.95005 | 5.00E-05 | 0.0014988 | yes |
| <i>FHOD3</i>      | 18:33877701-34360018  | 6.18409  | 9.187   | 0.571031 | 2.86538 | 5.00E-05 | 0.0014988 | yes |
| <i>FANCB</i>      | X:14861528-14891184   | 2.17733  | 3.23359 | 0.570575 | 2.68506 | 1.00E-04 | 0.0027579 | yes |
| <i>PLXDC2</i>     | 10:20105371-20569115  | 1.87932  | 2.78787 | 0.568955 | 2.47387 | 5.00E-05 | 0.0014988 | yes |
| <i>CBX6</i>       | 22:39260242-39268258  | 3.13637  | 4.65218 | 0.568811 | 2.84181 | 5.00E-05 | 0.0014988 | yes |
| <i>BACE2</i>      | 21:42539727-42648524  | 19.3119  | 28.6394 | 0.568514 | 2.67431 | 5.00E-05 | 0.0014988 | yes |
| <i>PPAP2B</i>     | 1:56960418-57045257   | 0.736888 | 1.09263 | 0.568291 | 1.90232 | 0.00305  | 0.0418351 | yes |
| <i>HSPA1B</i>     | 6:31795511-31798031   | 10.8361  | 16.0427 | 0.566068 | 3.042   | 5.00E-05 | 0.0014988 | yes |
| <i>TSPAN12</i>    | 7:120427373-120498177 | 1.33362  | 1.97188 | 0.564224 | 2.26163 | 0.0011   | 0.0190409 | yes |
| <i>EPCAM</i>      | 2:47596286-47614167   | 44.4656  | 65.6728 | 0.562606 | 3.22657 | 5.00E-05 | 0.0014988 | yes |
| <i>DUSP10</i>     | 1:221874763-221915516 | 4.30613  | 6.35958 | 0.562539 | 2.63712 | 1.00E-04 | 0.0027579 | yes |
| <i>ZDHHC21</i>    | 9:14611068-14693480   | 1.50407  | 2.21992 | 0.561633 | 3.43069 | 5.00E-05 | 0.0014988 | yes |
| <i>FANCM</i>      | 14:45605135-45670093  | 1.90378  | 2.80715 | 0.560236 | 3.36139 | 5.00E-05 | 0.0014988 | yes |



|                 |                        |         |         |          |         |          |           |     |
|-----------------|------------------------|---------|---------|----------|---------|----------|-----------|-----|
| <i>CENPM</i>    | 22:42334740-42343148   | 10.4052 | 15.3396 | 0.559962 | 2.50626 | 5.00E-05 | 0.0014988 | yes |
| <i>C9orf142</i> | 9:139886869-139888428  | 20.0553 | 29.5483 | 0.559094 | 3.7443  | 5.00E-05 | 0.0014988 | yes |
| <i>MAPK8IP1</i> | 11:45907046-45928016   | 2.23057 | 3.27786 | 0.555339 | 2.68561 | 5.00E-05 | 0.0014988 | yes |
| <i>F12</i>      | 5:176829138-176836577  | 3.01603 | 4.42598 | 0.553345 | 2.84981 | 5.00E-05 | 0.0014988 | yes |
| <i>PIGX</i>     | 3:196439244-196462878  | 6.07877 | 8.92034 | 0.553318 | 2.32032 | 4.00E-04 | 0.0086622 | yes |
| <i>BRCA2</i>    | 13:32889616-32973809   | 1.88667 | 2.76641 | 0.552175 | 3.27815 | 5.00E-05 | 0.0014988 | yes |
| <i>UHRF1</i>    | 19:4909509-4962165     | 29.152  | 42.7428 | 0.552084 | 2.73939 | 5.00E-05 | 0.0014988 | yes |
| <i>TONSL</i>    | 8:145654162-145669812  | 6.12753 | 8.98151 | 0.551652 | 2.86066 | 5.00E-05 | 0.0014988 | yes |
| <i>MCM4</i>     | 8:48872762-48890720    | 45.6786 | 66.9453 | 0.551465 | 3.0186  | 5.00E-05 | 0.0014988 | yes |
| <i>ABHD15</i>   | 17:27887678-27894042   | 1.65581 | 2.42558 | 0.550798 | 2.5798  | 2.00E-04 | 0.004937  | yes |
| <i>PLK2</i>     | 5:57749808-57755966    | 16.3451 | 23.9421 | 0.550692 | 2.82248 | 5.00E-05 | 0.0014988 | yes |
| <i>ZNF124</i>   | 1:247285276-247335318  | 2.09256 | 3.05619 | 0.546465 | 1.88835 | 0.0024   | 0.0346006 | yes |
| <i>IFI30</i>    | 19:18284578-18288927   | 9.72689 | 14.1954 | 0.54537  | 3.08187 | 5.00E-05 | 0.0014988 | yes |
| <i>C4orf46</i>  | 4:159587830-159593202  | 5.8681  | 8.56198 | 0.545051 | 2.99421 | 5.00E-05 | 0.0014988 | yes |
| <i>MIS18A</i>   | 21:33640529-33651376   | 14.0203 | 20.4447 | 0.544216 | 3.32942 | 5.00E-05 | 0.0014988 | yes |
| <i>B3GNT1</i>   | 11:66112842-66115161   | 3.68099 | 5.36475 | 0.543416 | 2.80033 | 5.00E-05 | 0.0014988 | yes |
| <i>JPH1</i>     | 8:75146938-75233562    | 2.1144  | 3.07984 | 0.542607 | 2.99888 | 5.00E-05 | 0.0014988 | yes |
| <i>HMGCS1</i>   | 5:43287571-43313614    | 137.31  | 199.86  | 0.541559 | 2.89675 | 5.00E-05 | 0.0014988 | yes |
| <i>CHST2</i>    | 3:142838617-142842856  | 1.06356 | 1.54617 | 0.539798 | 2.26094 | 4.00E-04 | 0.0086622 | yes |
| <i>GSG2</i>     | 17:3617918-3704537     | 4.04247 | 5.87463 | 0.539262 | 1.92496 | 0.00135  | 0.0222521 | yes |
| <i>FZD3</i>     | 8:28351721-28431785    | 1.12897 | 1.63962 | 0.538355 | 3.10199 | 5.00E-05 | 0.0014988 | yes |
| <i>XRCC2</i>    | 7:152343582-152373250  | 4.28533 | 6.21997 | 0.537503 | 3.17147 | 5.00E-05 | 0.0014988 | yes |
| <i>DHCR24</i>   | 1:55315299-55352921    | 104.118 | 151.014 | 0.53647  | 2.77684 | 5.00E-05 | 0.0014988 | yes |
| <i>PIGM</i>     | 1:159997461-160001783  | 2.88899 | 4.18923 | 0.536116 | 3.00286 | 5.00E-05 | 0.0014988 | yes |
| <i>D2HGDH</i>   | 2:242674029-242708231  | 1.8582  | 2.69438 | 0.536053 | 2.25271 | 0.00045  | 0.0095063 | yes |
| <i>MSH6</i>     | 2:48010220-48132932    | 26.5626 | 38.4337 | 0.532977 | 2.11775 | 1.00E-04 | 0.0027579 | yes |
| <i>ITGBL1</i>   | 13:102104965-102368794 | 1.63338 | 2.36316 | 0.532858 | 2.02617 | 0.00035  | 0.0077304 | yes |
| <i>PDXP</i>     | 22:38054736-38062939   | 6.88238 | 9.95436 | 0.532421 | 2.87979 | 5.00E-05 | 0.0014988 | yes |
| <i>ADCK2</i>    | 7:140372952-140394908  | 4.77408 | 6.90485 | 0.532388 | 2.69907 | 5.00E-05 | 0.0014988 | yes |
| <i>CDH13</i>    | 16:82660398-83830215   | 8.61965 | 12.462  | 0.531839 | 1.95126 | 0.0016   | 0.025428  | yes |
| <i>PHLPP1</i>   | 18:60382671-60647676   | 2.06074 | 2.9773  | 0.53084  | 2.97729 | 5.00E-05 | 0.0014988 | yes |
| <i>CCDC115</i>  | 2:131095815-131099922  | 5.86979 | 8.4776  | 0.530346 | 2.80596 | 5.00E-05 | 0.0014988 | yes |
| <i>CBX2</i>     | 17:77751976-77761449   | 1.68256 | 2.42994 | 0.530264 | 2.17546 | 5.00E-05 | 0.0014988 | yes |
| <i>THOC3</i>    | 5:175386533-175395545  | 3.74854 | 5.41267 | 0.53001  | 2.47493 | 5.00E-05 | 0.0014988 | yes |

|                 |                        |         |          |          |         |          |           |     |
|-----------------|------------------------|---------|----------|----------|---------|----------|-----------|-----|
| <i>CCBE1</i>    | 18:57098170-57364644   | 16.1265 | 23.2692  | 0.528988 | 2.80332 | 5.00E-05 | 0.0014988 | yes |
| <i>MCM7</i>     | 7:99690403-99723131    | 73.1594 | 105.539  | 0.528666 | 2.44377 | 0.00015  | 0.0038882 | yes |
| <i>RPUSD1</i>   | 16:834973-838383       | 9.28631 | 13.3496  | 0.523618 | 2.70211 | 5.00E-05 | 0.0014988 | yes |
| <i>EFNB3</i>    | 17:7608519-7614693     | 2.08581 | 2.99818  | 0.523474 | 2.20669 | 5.00E-05 | 0.0014988 | yes |
| <i>PSTPIP2</i>  | 18:43563501-43652250   | 2.07067 | 2.97227  | 0.521467 | 2.43663 | 0.00035  | 0.0077304 | yes |
| <i>DGCR6L</i>   | 22:20301760-20307628   | 5.8825  | 8.43568  | 0.520073 | 2.70634 | 0.00025  | 0.0059445 | yes |
| <i>FEN1</i>     | 11:61560108-61564716   | 34.5321 | 49.5101  | 0.519787 | 2.88569 | 5.00E-05 | 0.0014988 | yes |
| <i>USP1</i>     | 1:62901974-62917475    | 24.3117 | 34.7986  | 0.517381 | 2.90075 | 5.00E-05 | 0.0014988 | yes |
| <i>UBXN8</i>    | 8:30601689-30624522    | 6.0289  | 8.6278   | 0.517098 | 2.64534 | 5.00E-05 | 0.0014988 | yes |
| <i>ZNF530</i>   | 19:58111252-58119637   | 1.35963 | 1.94475  | 0.516373 | 2.10097 | 0.0015   | 0.0242609 | yes |
| <i>GGCT</i>     | 7:30536236-30544457    | 26.2099 | 37.4741  | 0.515783 | 1.76245 | 0.00325  | 0.0436529 | yes |
| <i>RAD18</i>    | 3:8918879-9005159      | 6.53111 | 9.33213  | 0.514879 | 2.6776  | 5.00E-05 | 0.0014988 | yes |
| <i>DSCC1</i>    | 8:120846180-120868170  | 8.94183 | 12.7725  | 0.514404 | 3.32004 | 5.00E-05 | 0.0014988 | yes |
| <i>NEIL3</i>    | 4:178230990-178284092  | 7.43516 | 10.5906  | 0.510355 | 2.98161 | 5.00E-05 | 0.0014988 | yes |
| <i>CHPT1</i>    | 12:102091416-102133250 | 7.30644 | 10.4041  | 0.509913 | 2.78154 | 5.00E-05 | 0.0014988 | yes |
| <i>CDC7</i>     | 1:91966403-91991321    | 7.53034 | 10.72    | 0.509511 | 2.47447 | 5.00E-05 | 0.0014988 | yes |
| <i>FOXC2</i>    | 16:86600856-86602539   | 3.07121 | 4.3701   | 0.50886  | 2.91512 | 0.0019   | 0.0290653 | yes |
| <i>ANKRD32</i>  | 5:93954390-94031573    | 5.64012 | 8.02474  | 0.508729 | 2.92854 | 5.00E-05 | 0.0014988 | yes |
| <i>SFXN2</i>    | 10:104474297-104498946 | 2.68611 | 3.81807  | 0.507326 | 2.33487 | 2.00E-04 | 0.004937  | yes |
| <i>TENM2</i>    | 5:166711842-167691162  | 2.42349 | 3.44313  | 0.506632 | 2.55342 | 5.00E-05 | 0.0014988 | yes |
| <i>SAMD12</i>   | 8:119201693-119738306  | 0.49406 | 0.701486 | 0.50573  | 1.92417 | 7.00E-04 | 0.0135861 | yes |
| <i>ENTPD3</i>   | 3:40428672-40494799    | 4.04144 | 5.73785  | 0.505641 | 2.54599 | 5.00E-05 | 0.0014988 | yes |
| <i>TK1</i>      | 17:76170159-76183285   | 43.9841 | 62.3925  | 0.504391 | 3.04713 | 5.00E-05 | 0.0014988 | yes |
| <i>DONSON</i>   | 21:34949856-34961014   | 13.2511 | 18.7935  | 0.504114 | 3.07407 | 5.00E-05 | 0.0014988 | yes |
| <i>CTSF</i>     | 11:66330934-66336047   | 4.4414  | 6.29668  | 0.503577 | 2.56867 | 5.00E-05 | 0.0014988 | yes |
| <i>C6orf203</i> | 6:107349406-107372546  | 12.754  | 18.0417  | 0.500388 | 2.30724 | 0.00015  | 0.0038882 | yes |
| <i>SLC46A1</i>  | 17:26698986-26733230   | 2.29335 | 3.24328  | 0.499992 | 1.86853 | 8.00E-04 | 0.0151114 | yes |
| <i>DCLRE1B</i>  | 1:114447914-114456708  | 5.95828 | 8.41218  | 0.497584 | 2.41749 | 5.00E-05 | 0.0014988 | yes |
| <i>SLBP</i>     | 4:1694526-1714030      | 54.4577 | 76.8819  | 0.497508 | 3.21256 | 5.00E-05 | 0.0014988 | yes |
| <i>FOXRED2</i>  | 22:36883232-36903148   | 2.08988 | 2.95028  | 0.497431 | 2.41792 | 5.00E-05 | 0.0014988 | yes |
| <i>GEMIN5</i>   | 5:154266975-154317776  | 10.1581 | 14.3311  | 0.496523 | 1.75795 | 0.00155  | 0.0248368 | yes |
| <i>TIMM21</i>   | 18:71815745-71826204   | 19.8623 | 28.0132  | 0.496078 | 2.92761 | 5.00E-05 | 0.0014988 | yes |
| <i>RAB36</i>    | 22:23487512-23506531   | 1.00106 | 1.41038  | 0.494558 | 1.84977 | 0.0019   | 0.0290653 | yes |
| <i>DIDO1</i>    | 20:61509089-61569304   | 6.06429 | 8.54317  | 0.494432 | 1.79907 | 0.00275  | 0.0384332 | yes |

|                     |                        |          |         |          |         |          |           |     |
|---------------------|------------------------|----------|---------|----------|---------|----------|-----------|-----|
| <i>ITGA4</i>        | 2:182321618-182521834  | 0.840999 | 1.18307 | 0.492355 | 1.94846 | 0.00245  | 0.0351582 | yes |
| <i>KIAA1715</i>     | 2:176790409-176867018  | 4.54653  | 6.37555 | 0.487783 | 2.58376 | 5.00E-05 | 0.0014988 | yes |
| <i>ESCO2</i>        | 8:27632057-27662425    | 7.98912  | 11.1994 | 0.487316 | 3.15015 | 1.00E-04 | 0.0027579 | yes |
| <i>CHST12</i>       | 7:2443194-2474242      | 3.14953  | 4.41232 | 0.486401 | 2.34985 | 5.00E-05 | 0.0014988 | yes |
| <i>DCLRE1A</i>      | 10:115594483-115613859 | 3.68994  | 5.16627 | 0.485527 | 2.40263 | 0.00015  | 0.0038882 | yes |
| <i>HADH</i>         | 4:108910869-108956331  | 11.8726  | 16.6173 | 0.485058 | 2.45021 | 1.00E-04 | 0.0027579 | yes |
| <i>ZWILCH</i>       | 15:66797430-66857835   | 17.5662  | 24.5544 | 0.483176 | 2.17065 | 0.0025   | 0.0356451 | yes |
| <i>WDHD1</i>        | 14:55405655-55493819   | 9.21517  | 12.8504 | 0.47973  | 2.38789 | 5.00E-05 | 0.0014988 | yes |
| <i>STRADB</i>       | 2:202316391-202345574  | 8.47039  | 11.8104 | 0.479554 | 2.57131 | 5.00E-05 | 0.0014988 | yes |
| <i>TCEA2</i>        | 20:62688438-62703700   | 3.83746  | 5.35038 | 0.479492 | 2.15604 | 8.00E-04 | 0.0151114 | yes |
| <i>PPP1R3B</i>      | 8:8993763-9009152      | 1.414    | 1.97144 | 0.479466 | 2.16333 | 0.00015  | 0.0038882 | yes |
| <i>BRI3BP</i>       | 12:125478193-125510349 | 11.6734  | 16.2747 | 0.479404 | 2.98246 | 5.00E-05 | 0.0014988 | yes |
| <i>CASP8AP2</i>     | 6:90539618-90584155    | 6.77332  | 9.44024 | 0.478961 | 2.67473 | 5.00E-05 | 0.0014988 | yes |
| <i>SEPN1</i>        | 1:26126666-26144713    | 15.9809  | 22.2535 | 0.477687 | 1.80298 | 0.00115  | 0.0196005 | yes |
| <i>C18orf25</i>     | 18:43753987-43846955   | 3.91499  | 5.44993 | 0.47723  | 2.02906 | 0.00095  | 0.0173333 | yes |
| <i>KLHL23,PHOSF</i> | 2:170550963-170608396  | 6.0325   | 8.39387 | 0.47658  | 2.62607 | 0.00015  | 0.0038882 | yes |
| <i>MAN2A2</i>       | 15:91447419-91465815   | 1.67318  | 2.32616 | 0.475355 | 2.17431 | 1.00E-04 | 0.0027579 | yes |
| <i>SLC29A1</i>      | 6:44187241-44201888    | 34.5671  | 47.9809 | 0.473063 | 2.5051  | 5.00E-05 | 0.0014988 | yes |
| <i>FZD8</i>         | 10:35927176-35930362   | 4.05074  | 5.62253 | 0.473035 | 2.59278 | 5.00E-05 | 0.0014988 | yes |
| <i>OSBP2</i>        | 22:31090792-31303811   | 3.4936   | 4.84583 | 0.472027 | 2.46886 | 1.00E-04 | 0.0027579 | yes |
| <i>PPFIA4</i>       | 1:203020310-203047864  | 0.892053 | 1.23552 | 0.469912 | 1.76229 | 0.001    | 0.0178882 | yes |
| <i>CSRP2</i>        | 12:77252495-77272799   | 25.0397  | 34.6643 | 0.469232 | 2.83009 | 5.00E-05 | 0.0014988 | yes |
| <i>RCBTB2</i>       | 13:49063098-49107316   | 1.23152  | 1.70479 | 0.469152 | 1.83495 | 0.0032   | 0.0433186 | yes |
| <i>MBOAT7</i>       | 19:54677105-54693733   | 21.9015  | 30.317  | 0.469095 | 2.52458 | 5.00E-05 | 0.0014988 | yes |
| <i>EMP2</i>         | 16:10622278-10674539   | 6.32469  | 8.74763 | 0.467898 | 2.23247 | 5.00E-05 | 0.0014988 | yes |
| <i>BEND3</i>        | 6:107386384-107435636  | 1.60528  | 2.21889 | 0.467008 | 2.30682 | 5.00E-05 | 0.0014988 | yes |
| <i>URB2</i>         | 1:229761980-229795946  | 4.3465   | 6.00053 | 0.465235 | 2.31486 | 5.00E-05 | 0.0014988 | yes |
| <i>NAAA</i>         | 4:76831807-76862166    | 2.7952   | 3.85827 | 0.465002 | 1.65763 | 0.00355  | 0.0461649 | yes |
| <i>WIPF1</i>        | 2:175424301-175547627  | 3.61746  | 4.99083 | 0.464304 | 2.42529 | 1.00E-04 | 0.0027579 | yes |
| <i>FAM195A</i>      | 16:691848-698474       | 6.96402  | 9.59942 | 0.463026 | 2.53788 | 0.00195  | 0.029568  | yes |
| <i>MFSD1</i>        | 3:158519714-158547508  | 7.55115  | 10.3997 | 0.461774 | 2.17056 | 3.00E-04 | 0.0068401 | yes |
| <i>PIGW</i>         | 17:34891402-34895150   | 9.72107  | 13.3807 | 0.460968 | 2.60705 | 2.00E-04 | 0.004937  | yes |
| <i>C21orf58</i>     | 21:47721046-47743785   | 2.53684  | 3.48983 | 0.460122 | 2.16252 | 0.00025  | 0.0059445 | yes |
| <i>PCGF5</i>        | 10:92922768-93044088   | 3.10693  | 4.27301 | 0.459764 | 2.13572 | 0.0015   | 0.0242609 | yes |

|                   |                        |         |         |          |         |          |           |     |
|-------------------|------------------------|---------|---------|----------|---------|----------|-----------|-----|
| <i>CMBL</i>       | 5:10277706-10308168    | 3.39938 | 4.67515 | 0.459741 | 2.1232  | 1.00E-04 | 0.0027579 | yes |
| <i>HSPA4L</i>     | 4:128703452-128754522  | 6.33197 | 8.69711 | 0.457882 | 2.68777 | 5.00E-05 | 0.0014988 | yes |
| <i>HS3ST1</i>     | 4:11399987-11430537    | 9.62904 | 13.2205 | 0.457312 | 3.05929 | 0.00015  | 0.0038882 | yes |
| <i>FAM81A</i>     | 15:59730371-59815751   | 1.21518 | 1.66809 | 0.457035 | 1.91089 | 0.00335  | 0.0444197 | yes |
| <i>TMEM109</i>    | 11:60681370-60690915   | 11.4651 | 15.7103 | 0.454462 | 2.32427 | 5.00E-05 | 0.0014988 | yes |
| <i>SAMD1</i>      | 19:14199228-14201232   | 17.7108 | 24.2653 | 0.454268 | 3.15578 | 1.00E-04 | 0.0027579 | yes |
| <i>RAB20</i>      | 13:111175412-111214071 | 4.08522 | 5.59388 | 0.453436 | 2.09011 | 0.00105  | 0.0185265 | yes |
| <i>TRAM2</i>      | 6:52362199-52441862    | 17.1985 | 23.5433 | 0.453037 | 2.24929 | 5.00E-05 | 0.0014988 | yes |
| <i>RAD51</i>      | 15:40987326-41024356   | 7.44123 | 10.1817 | 0.452367 | 2.04262 | 3.00E-04 | 0.0068401 | yes |
| <i>PCYOX1L</i>    | 5:148737569-148749221  | 6.18822 | 8.464   | 0.451816 | 2.3734  | 5.00E-05 | 0.0014988 | yes |
| <i>ST6GALNAC4</i> | 9:130670164-130679305  | 5.82858 | 7.96975 | 0.451389 | 1.86158 | 0.00325  | 0.0436529 | yes |
| <i>SOX7</i>       | 8:10581277-10588022    | 12.0179 | 16.4274 | 0.45092  | 2.39631 | 5.00E-05 | 0.0014988 | yes |
| <i>PXMP2</i>      | 12:133264191-133281577 | 15.0817 | 20.6144 | 0.450857 | 2.57583 | 0.00025  | 0.0059445 | yes |
| <i>CDCA5</i>      | 11:64844926-64851615   | 18.9101 | 25.8453 | 0.450746 | 2.34642 | 1.00E-04 | 0.0027579 | yes |
| <i>RTN4R</i>      | 22:20228937-20255816   | 6.16665 | 8.42447 | 0.450099 | 2.53984 | 2.00E-04 | 0.004937  | yes |
| <i>ZC3HAV1L</i>   | 7:138710451-138720775  | 2.59943 | 3.54912 | 0.449267 | 1.93623 | 0.00355  | 0.0461649 | yes |
| <i>C16orf55</i>   | 16:89724209-89737675   | 2.92458 | 3.98998 | 0.448153 | 1.99432 | 9.00E-04 | 0.0166758 | yes |
| <i>THRB</i>       | 3:24158643-24541502    | 1.05802 | 1.4426  | 0.447304 | 2.05163 | 5.00E-04 | 0.0104629 | yes |
| <i>FBXO41</i>     | 2:73481809-73496758    | 1.31772 | 1.79668 | 0.447284 | 2.08315 | 3.00E-04 | 0.0068401 | yes |
| <i>NAGPA</i>      | 16:5074844-5092972     | 4.11877 | 5.61505 | 0.447088 | 2.32529 | 4.00E-04 | 0.0086622 | yes |
| <i>GPD1L</i>      | 3:32148002-32210207    | 1.04031 | 1.41822 | 0.447072 | 1.75207 | 0.00335  | 0.0444197 | yes |
| <i>WDR7</i>       | 18:54318615-54697036   | 1.38862 | 1.89079 | 0.445343 | 2.09801 | 0.00025  | 0.0059445 | yes |
| <i>MVK</i>        | 12:110011499-110035071 | 13.9411 | 18.9729 | 0.444595 | 2.24788 | 1.00E-04 | 0.0027579 | yes |
| <i>ZNF675</i>     | 19:23835707-23870017   | 6.4983  | 8.84103 | 0.444152 | 2.97264 | 3.00E-04 | 0.0068401 | yes |
| <i>LRFN3</i>      | 19:36428021-36436097   | 4.94532 | 6.72668 | 0.44383  | 2.95055 | 4.00E-04 | 0.0086622 | yes |
| <i>SLC39A6</i>    | 18:33688493-33709357   | 26.6369 | 36.2193 | 0.443331 | 2.49613 | 5.00E-05 | 0.0014988 | yes |
| <i>SCCPDH</i>     | 1:246887377-246931439  | 2.83326 | 3.85229 | 0.443255 | 2.2618  | 0.0011   | 0.0190409 | yes |
| <i>LRRC28</i>     | 15:99791651-99926498   | 3.97681 | 5.40682 | 0.443169 | 2.30416 | 0.0031   | 0.0423712 | yes |
| <i>CCDC117</i>    | 22:29168661-29185283   | 5.48014 | 7.43979 | 0.441048 | 2.35747 | 3.00E-04 | 0.0068401 | yes |
| <i>TMEM160</i>    | 19:47549166-47551882   | 11.0303 | 14.97   | 0.440604 | 2.75706 | 0.00225  | 0.0328344 | yes |
| <i>NUBP2</i>      | 16:1832932-1839192     | 17.3729 | 23.5734 | 0.440323 | 2.56426 | 2.00E-04 | 0.004937  | yes |
| <i>SLC45A3</i>    | 1:205626980-205649630  | 1.64503 | 2.22782 | 0.437525 | 1.81681 | 0.00155  | 0.0248368 | yes |
| <i>SIX1</i>       | 14:61111416-61116155   | 5.7935  | 7.84318 | 0.437003 | 2.44235 | 0.00015  | 0.0038882 | yes |
| <i>C19orf48</i>   | 19:51300960-51307974   | 43.7038 | 59.1148 | 0.435762 | 2.50978 | 5.00E-05 | 0.0014988 | yes |

|                 |                        |          |          |          |         |          |           |     |
|-----------------|------------------------|----------|----------|----------|---------|----------|-----------|-----|
| <i>RARA</i>     | 17:38465422-38513895   | 9.2053   | 12.4477  | 0.435348 | 2.02794 | 5.00E-05 | 0.0014988 | yes |
| <i>BOLA3</i>    | 2:74362527-74375039    | 66.4055  | 89.7939  | 0.435315 | 1.93592 | 0.00105  | 0.0185265 | yes |
| <i>CBX5</i>     | 12:54624729-54673915   | 6.80413  | 9.19972  | 0.43518  | 2.19077 | 5.00E-05 | 0.0014988 | yes |
| <i>VSIG10</i>   | 12:118501397-118541810 | 1.47029  | 1.98775  | 0.43504  | 1.92015 | 0.00055  | 0.0112366 | yes |
| <i>PGP</i>      | 16:2261602-2264822     | 8.33613  | 11.2694  | 0.434957 | 2.17787 | 0.00025  | 0.0059445 | yes |
| <i>FOSL2</i>    | 2:28607275-28637516    | 15.662   | 21.1619  | 0.434199 | 2.24495 | 5.00E-05 | 0.0014988 | yes |
| <i>SOX9</i>     | 17:70117160-70122561   | 19.5643  | 26.4048  | 0.432572 | 2.71188 | 5.00E-05 | 0.0014988 | yes |
| <i>SIPA1L2</i>  | 1:232533710-232651243  | 0.740168 | 0.998566 | 0.432004 | 1.78477 | 0.0035   | 0.0457061 | yes |
| <i>ALG6</i>     | 1:63833260-63904233    | 4.12022  | 5.55759  | 0.431737 | 2.62716 | 5.00E-05 | 0.0014988 | yes |
| <i>ADAMTS15</i> | 11:130318868-130346539 | 0.728161 | 0.981186 | 0.430268 | 1.57299 | 0.0039   | 0.0495948 | yes |
| <i>C14orf1</i>  | 14:76117232-76127538   | 39.4291  | 53.1195  | 0.429982 | 2.60364 | 5.00E-05 | 0.0014988 | yes |
| <i>THAP10</i>   | 15:71173680-71184772   | 3.06802  | 4.13224  | 0.429619 | 2.23015 | 0.00345  | 0.0452052 | yes |
| <i>FAM102B</i>  | 1:109102970-109181949  | 1.62344  | 2.18639  | 0.429499 | 2.1706  | 0.00075  | 0.0143591 | yes |
| <i>KRT7</i>     | 12:52626953-52642709   | 1294.92  | 1743.53  | 0.429149 | 2.2389  | 0.00015  | 0.0038882 | yes |
| <i>LBR</i>      | 1:225589203-225616557  | 12.3169  | 16.5742  | 0.428291 | 2.44682 | 5.00E-05 | 0.0014988 | yes |
| <i>FAM111A</i>  | 11:58910317-58922512   | 13.4931  | 18.1557  | 0.428205 | 2.24755 | 5.00E-05 | 0.0014988 | yes |
| <i>KCTD6</i>    | 3:58477822-58488087    | 4.25456  | 5.7239   | 0.427989 | 1.99102 | 0.0023   | 0.0333446 | yes |
| <i>HSP90AA1</i> | 14:102547074-102606086 | 543.994  | 731.768  | 0.427795 | 2.00232 | 2.00E-04 | 0.004937  | yes |
| <i>GAA</i>      | 17:78075354-78093679   | 8.10517  | 10.8989  | 0.427273 | 2.00745 | 0.00025  | 0.0059445 | yes |
| <i>L2HGDH</i>   | 14:50709151-50778947   | 2.73072  | 3.66988  | 0.42645  | 2.04847 | 2.00E-04 | 0.004937  | yes |
| <i>NDUFA4</i>   | 6:97337186-97345767    | 7.55361  | 10.1514  | 0.426438 | 2.64445 | 2.00E-04 | 0.004937  | yes |
| <i>RELT</i>     | 11:73087404-73108519   | 3.13246  | 4.20861  | 0.426047 | 1.9674  | 3.00E-04 | 0.0068401 | yes |
| <i>MAGEE1</i>   | X:75648045-75651746    | 1.70487  | 2.29018  | 0.425803 | 1.90926 | 0.00215  | 0.0316727 | yes |
| <i>TPD52</i>    | 8:80947102-81083836    | 13.5761  | 18.2326  | 0.425454 | 2.36048 | 3.00E-04 | 0.0068401 | yes |
| <i>C16orf62</i> | 16:19566736-19712485   | 3.03924  | 4.08068  | 0.425098 | 2.37668 | 0.00015  | 0.0038882 | yes |
| <i>SRGAP3</i>   | 3:9022274-9291369      | 1.98989  | 2.67149  | 0.424954 | 2.00655 | 0.00035  | 0.0077304 | yes |
| <i>PDK3</i>     | X:24483343-24568583    | 1.15097  | 1.54513  | 0.424871 | 1.85505 | 0.00215  | 0.0316727 | yes |
| <i>MTFP1</i>    | 22:30821610-30825041   | 20.1114  | 26.9872  | 0.424261 | 2.03705 | 0.001    | 0.0178882 | yes |
| <i>MBD3</i>     | 19:1576677-1592652     | 23.0136  | 30.8526  | 0.422906 | 2.33441 | 0.00035  | 0.0077304 | yes |
| <i>CPPED1</i>   | 16:12753655-12897744   | 2.27846  | 3.05385  | 0.422572 | 2.03994 | 5.00E-05 | 0.0014988 | yes |
| <i>AVPI1</i>    | 10:99437180-99447015   | 10.3345  | 13.8452  | 0.421924 | 2.59106 | 2.00E-04 | 0.004937  | yes |
| <i>LAPTM4B</i>  | 8:98787808-98864830    | 28.0173  | 37.5328  | 0.421834 | 2.56939 | 5.00E-05 | 0.0014988 | yes |
| <i>MT2A</i>     | 16:56642477-56643409   | 7006.22  | 9384.67  | 0.42167  | 5.83217 | 5.00E-05 | 0.0014988 | yes |
| <i>MMD</i>      | 17:53469973-53499341   | 8.90343  | 11.9159  | 0.420451 | 2.52204 | 0.00075  | 0.0143591 | yes |

|                 |                        |         |         |          |         |          |           |     |
|-----------------|------------------------|---------|---------|----------|---------|----------|-----------|-----|
| <i>NEURL1B</i>  | 5:172068275-172118543  | 1.86302 | 2.49271 | 0.420069 | 1.98299 | 1.00E-04 | 0.0027579 | yes |
| <i>SIMC1</i>    | 5:175665369-175772992  | 7.32173 | 9.79427 | 0.419753 | 2.43723 | 3.00E-04 | 0.0068401 | yes |
| <i>KDSR</i>     | 18:60994970-61034506   | 6.68102 | 8.9366  | 0.419657 | 2.37031 | 2.00E-04 | 0.004937  | yes |
| <i>SEC11C</i>   | 18:56807124-56826064   | 26.1699 | 34.9971 | 0.419326 | 2.45672 | 4.00E-04 | 0.0086622 | yes |
| <i>TMEM241</i>  | 18:20875976-21017925   | 2.36324 | 3.15852 | 0.418486 | 1.91216 | 0.0011   | 0.0190409 | yes |
| <i>MMP15</i>    | 16:58059281-58080805   | 2.22013 | 2.96706 | 0.418391 | 2.13648 | 9.00E-04 | 0.0166758 | yes |
| <i>C1orf159</i> | 1:1017197-1051736      | 4.62684 | 6.18222 | 0.418098 | 2.28439 | 0.00095  | 0.0173333 | yes |
| <i>SRM</i>      | 1:11114648-11120091    | 72.8294 | 97.3059 | 0.418006 | 2.65197 | 0.00015  | 0.0038882 | yes |
| <i>RABIF</i>    | 1:202847409-202858385  | 3.70864 | 4.95478 | 0.417933 | 2.30073 | 0.00015  | 0.0038882 | yes |
| <i>GINS1</i>    | 20:25388322-25429191   | 11.521  | 15.3901 | 0.417745 | 2.20401 | 1.00E-04 | 0.0027579 | yes |
| <i>XYLB</i>     | 3:38388250-38456467    | 1.20785 | 1.61321 | 0.417487 | 1.6379  | 0.00385  | 0.0490393 | yes |
| <i>POLQ</i>     | 3:121150272-121264853  | 2.85562 | 3.81381 | 0.41743  | 2.22756 | 4.00E-04 | 0.0086622 | yes |
| <i>IPMK</i>     | 10:59951277-60027694   | 2.18537 | 2.91794 | 0.417071 | 2.55321 | 0.00025  | 0.0059445 | yes |
| <i>ZCCHC2</i>   | 18:60190657-60245818   | 2.60824 | 3.48237 | 0.416988 | 2.17021 | 0.00055  | 0.0112366 | yes |
| <i>CDH2</i>     | 18:25530929-25757445   | 7.00373 | 9.34898 | 0.416686 | 2.26882 | 5.00E-05 | 0.0014988 | yes |
| <i>ZNF395</i>   | 8:28203101-28243977    | 14.1149 | 18.8343 | 0.416141 | 2.04062 | 5.00E-05 | 0.0014988 | yes |
| <i>HSPA1A</i>   | 6:31783290-31785719    | 7.91203 | 10.555  | 0.415813 | 2.23928 | 3.00E-04 | 0.0068401 | yes |
| <i>FAM122A</i>  | 9:71320615-71624091    | 3.35573 | 4.47299 | 0.414615 | 2.39376 | 0.00055  | 0.0112366 | yes |
| <i>C7orf26</i>  | 7:6629914-6648355      | 6.91293 | 9.21436 | 0.414586 | 2.36079 | 3.00E-04 | 0.0068401 | yes |
| <i>FTL</i>      | 19:49468565-49470136   | 545.04  | 725.887 | 0.413383 | 2.86185 | 2.00E-04 | 0.004937  | yes |
| <i>SLC1A1</i>   | 9:4490426-4587469      | 1.90419 | 2.53551 | 0.413099 | 2.02151 | 0.00205  | 0.0305767 | yes |
| <i>FZD5</i>     | 2:208627309-208634143  | 0.90664 | 1.20658 | 0.412316 | 1.787   | 0.0023   | 0.0333446 | yes |
| <i>ZNF714</i>   | 19:21264952-21307897   | 1.63631 | 2.17693 | 0.411852 | 2.25878 | 0.00035  | 0.0077304 | yes |
| <i>RNF219</i>   | 13:78628989-79233314   | 9.03943 | 12.023  | 0.411497 | 2.01208 | 4.00E-04 | 0.0086622 | yes |
| <i>HPS6</i>     | 10:103825123-103827795 | 7.53409 | 10.0195 | 0.411301 | 2.07846 | 0.00065  | 0.0128896 | yes |
| <i>TMEM14A</i>  | 6:52535883-52551386    | 30.3845 | 40.4057 | 0.411221 | 2.41672 | 5.00E-04 | 0.0104629 | yes |
| <i>NCR3LG1</i>  | 11:17373308-17398868   | 2.08625 | 2.77219 | 0.410116 | 2.02248 | 3.00E-04 | 0.0068401 | yes |
| <i>CHAMP1</i>   | 13:115079964-115092803 | 13.733  | 18.2453 | 0.409877 | 2.36392 | 0.00045  | 0.0095063 | yes |
| <i>LAGE3</i>    | X:153705240-153707596  | 3.94911 | 5.24523 | 0.409479 | 1.94195 | 0.0015   | 0.0242609 | yes |
| <i>LCMT2</i>    | 15:43619973-43622820   | 4.90948 | 6.52053 | 0.409418 | 2.14972 | 0.00035  | 0.0077304 | yes |
| <i>LIN54</i>    | 4:83845755-83934040    | 2.94627 | 3.91274 | 0.409293 | 1.97485 | 0.0012   | 0.0202526 | yes |
| <i>DTWD2</i>    | 5:118172568-118324240  | 1.43917 | 1.90996 | 0.408309 | 2.05919 | 0.00325  | 0.0436529 | yes |
| <i>THNSL1</i>   | 10:25270907-25351208   | 2.89138 | 3.83663 | 0.408079 | 1.99603 | 0.00075  | 0.0143591 | yes |
| <i>RNF138</i>   | 18:29671817-29711524   | 7.45424 | 9.88683 | 0.407447 | 2.06968 | 0.00325  | 0.0436529 | yes |

|                 |                        |         |         |          |         |          |           |     |
|-----------------|------------------------|---------|---------|----------|---------|----------|-----------|-----|
| <i>FAM108C1</i> | 15:80987651-81047962   | 9.4107  | 12.4703 | 0.406122 | 2.46377 | 0.00035  | 0.0077304 | yes |
| <i>C5orf30</i>  | 5:102594441-102614361  | 4.38092 | 5.79941 | 0.404674 | 2.43414 | 0.00055  | 0.0112366 | yes |
| <i>LCLAT1</i>   | 2:30670122-30867091    | 4.67663 | 6.18128 | 0.402437 | 1.82813 | 0.0033   | 0.0440577 | yes |
| <i>CD320</i>    | 19:8367010-8373240     | 18.8866 | 24.9612 | 0.402323 | 2.08757 | 0.00055  | 0.0112366 | yes |
| <i>ELOVL6</i>   | 4:110970228-111119820  | 35.0399 | 46.3081 | 0.402266 | 2.144   | 2.00E-04 | 0.004937  | yes |
| <i>9-Mar</i>    | 12:58148880-58154193   | 3.39643 | 4.48688 | 0.401696 | 2.00005 | 0.00125  | 0.0209598 | yes |
| <i>BRAT1</i>    | 7:2577443-2595392      | 6.49582 | 8.57759 | 0.40106  | 2.13883 | 6.00E-04 | 0.0120833 | yes |
| <i>GEMIN4</i>   | 17:647660-655501       | 14.4867 | 19.1204 | 0.400382 | 2.11158 | 0.00025  | 0.0059445 | yes |
| <i>GLRX2</i>    | 1:193065594-193075244  | 24.1517 | 31.8269 | 0.398119 | 2.17375 | 0.00055  | 0.0112366 | yes |
| <i>MLF1IP</i>   | 4:185570766-185655286  | 26.0854 | 34.3574 | 0.397382 | 2.2966  | 0.0011   | 0.0190409 | yes |
| <i>FIGNL1</i>   | 7:50511830-50518088    | 7.83832 | 10.3184 | 0.396604 | 2.10089 | 0.00055  | 0.0112366 | yes |
| <i>ZNF232</i>   | 17:5009030-5026397     | 4.2494  | 5.59243 | 0.396215 | 1.96344 | 0.0012   | 0.0202526 | yes |
| <i>JTB</i>      | 1:153940314-153950451  | 29.1107 | 38.3098 | 0.396165 | 2.03733 | 0.00135  | 0.0222521 | yes |
| <i>FUCA1</i>    | 1:24171566-24194859    | 5.70523 | 7.50554 | 0.395672 | 2.24334 | 4.00E-04 | 0.0086622 | yes |
| <i>BAG1</i>     | 9:33252468-33264759    | 4.39583 | 5.78231 | 0.395511 | 2.02392 | 0.00055  | 0.0112366 | yes |
| <i>FAM100A</i>  | 16:4658883-4664927     | 15.5015 | 20.3841 | 0.395035 | 2.37229 | 6.00E-04 | 0.0120833 | yes |
| <i>LIN9</i>     | 1:226418849-226497449  | 4.66513 | 6.13126 | 0.394268 | 2.08017 | 7.00E-04 | 0.0135861 | yes |
| <i>TARBP1</i>   | 1:234527058-234614849  | 3.16386 | 4.15721 | 0.393929 | 2.19083 | 7.00E-04 | 0.0135861 | yes |
| <i>SUFU</i>     | 10:104263718-104393214 | 2.17614 | 2.85579 | 0.392118 | 1.62204 | 0.0012   | 0.0202526 | yes |
| <i>TOP3A</i>    | 17:18177234-18218321   | 6.38559 | 8.37861 | 0.391891 | 1.97328 | 0.00085  | 0.0159588 | yes |
| <i>TMX3</i>     | 18:66340924-66382353   | 14.2304 | 18.6664 | 0.391462 | 2.28373 | 6.00E-04 | 0.0120833 | yes |
| <i>TFAM</i>     | 10:60144902-60158990   | 15.0193 | 19.6992 | 0.391316 | 2.18565 | 0.00055  | 0.0112366 | yes |
| <i>ITFG3</i>    | 16:284800-316119       | 10.4199 | 13.6658 | 0.391222 | 2.03671 | 7.00E-04 | 0.0135861 | yes |
| <i>GTDC2</i>    | 3:43120720-43147575    | 6.28256 | 8.23713 | 0.390788 | 1.99732 | 0.0013   | 0.0216115 | yes |
| <i>USP38</i>    | 4:144106069-144143141  | 5.37    | 7.03704 | 0.390047 | 2.19191 | 0.00085  | 0.0159588 | yes |
| <i>KIAA1467</i> | 12:13197314-13236383   | 1.33753 | 1.75222 | 0.389615 | 1.69622 | 0.0038   | 0.048682  | yes |
| <i>C2orf43</i>  | 2:20884817-21022827    | 6.1182  | 8.01152 | 0.388968 | 2.1731  | 0.00095  | 0.0173333 | yes |
| <i>HSPA14</i>   | 10:14880260-14913740   | 14.1949 | 18.5718 | 0.38774  | 2.26696 | 0.001    | 0.0178882 | yes |
| <i>VOPP1</i>    | 7:55538305-55640200    | 34.8371 | 45.5521 | 0.386893 | 1.94766 | 0.00045  | 0.0095063 | yes |
| <i>JUND</i>     | 19:18390562-18392432   | 34.1121 | 44.5999 | 0.386757 | 3.14602 | 0.00075  | 0.0143591 | yes |
| <i>LPCAT1</i>   | 5:1461541-1524076      | 17.0996 | 22.3523 | 0.386458 | 2.30647 | 7.00E-04 | 0.0135861 | yes |
| <i>SRSF3</i>    | 6:36562089-36572244    | 82.7887 | 108.209 | 0.386318 | 1.84327 | 0.00225  | 0.0328344 | yes |
| <i>EPT1</i>     | 2:26531040-26618759    | 8.31507 | 10.8666 | 0.386103 | 2.0426  | 0.00025  | 0.0059445 | yes |
| <i>EXOSC5</i>   | 19:41892274-41903256   | 8.7258  | 11.3911 | 0.384549 | 2.06882 | 0.0022   | 0.0322563 | yes |

|                 |                        |         |         |          |         |          |           |     |
|-----------------|------------------------|---------|---------|----------|---------|----------|-----------|-----|
| <i>MND1</i>     | 4:154265800-154336247  | 13.5575 | 17.6907 | 0.383894 | 2.0138  | 0.00285  | 0.0394402 | yes |
| <i>THAP7</i>    | 22:21354060-21368576   | 12.6869 | 16.5477 | 0.38329  | 2.33299 | 0.0033   | 0.0440577 | yes |
| <i>SLC38A9</i>  | 5:54921672-55008163    | 7.13745 | 9.30849 | 0.38314  | 1.85287 | 0.0016   | 0.025428  | yes |
| <i>SUSD5</i>    | 3:33191536-33260707    | 2.12333 | 2.7687  | 0.382882 | 1.83859 | 8.00E-04 | 0.0151114 | yes |
| <i>LCP1</i>     | 13:46700057-46756459   | 20.9841 | 27.3587 | 0.382703 | 2.0609  | 0.00045  | 0.0095063 | yes |
| <i>GJC1</i>     | 17:42875815-42908179   | 3.59741 | 4.7905  | 0.382311 | 2.0098  | 0.001    | 0.0178882 | yes |
| <i>ZC3HAV1</i>  | 7:138728265-138794465  | 9.26968 | 12.0764 | 0.381598 | 2.0842  | 6.00E-04 | 0.0120833 | yes |
| <i>H2AFX</i>    | 11:118964583-118966177 | 51.9828 | 67.7188 | 0.381524 | 2.86185 | 0.00065  | 0.0128896 | yes |
| <i>RND3</i>     | 2:151324706-151344209  | 32.1734 | 41.906  | 0.381286 | 2.1292  | 4.00E-04 | 0.0086622 | yes |
| <i>TGFBRAP1</i> | 2:105883528-105946148  | 6.0421  | 7.86947 | 0.381218 | 1.93183 | 0.00125  | 0.0209598 | yes |
| <i>ABCB10</i>   | 1:229652328-229694442  | 6.86836 | 8.94495 | 0.381108 | 2.29675 | 0.00145  | 0.0237491 | yes |
| <i>AKR7A2</i>   | 1:19629201-19638640    | 12.9524 | 16.866  | 0.380899 | 2.04322 | 0.00065  | 0.0128896 | yes |
| <i>SCD</i>      | 10:102106771-102124588 | 461.211 | 600.331 | 0.380331 | 1.79996 | 0.00155  | 0.0248368 | yes |
| <i>TXNL4A</i>   | 18:77732866-77748532   | 34.063  | 44.3161 | 0.379625 | 2.19217 | 7.00E-04 | 0.0135861 | yes |
| <i>AUNIP</i>    | 1:26160496-26185848    | 5.95322 | 7.74084 | 0.378821 | 2.13772 | 0.00135  | 0.0222521 | yes |
| <i>GTF3A</i>    | 13:27998680-28024739   | 70.1622 | 91.227  | 0.378765 | 2.32861 | 0.003    | 0.0412221 | yes |
| <i>TFDP1</i>    | 13:114239002-114295788 | 52.3634 | 68.0622 | 0.378296 | 1.96612 | 0.00135  | 0.0222521 | yes |
| <i>FHL2</i>     | 2:105977282-106055230  | 70.6412 | 91.7841 | 0.377736 | 2.20706 | 0.00065  | 0.0128896 | yes |
| <i>FHDC1</i>    | 4:153864134-153900848  | 1.47514 | 1.91658 | 0.377682 | 1.84939 | 0.00145  | 0.0237491 | yes |
| <i>AGPAT3</i>   | 21:45285115-45407475   | 4.94752 | 6.42762 | 0.377579 | 1.84661 | 0.0011   | 0.0190409 | yes |
| <i>HMGB3</i>    | X:150151762-150159248  | 117.099 | 152.121 | 0.377485 | 1.98432 | 5.00E-04 | 0.0104629 | yes |
| <i>TBC1D4</i>   | 13:75858808-76056250   | 5.4537  | 7.08251 | 0.377025 | 2.0208  | 0.0011   | 0.0190409 | yes |
| <i>TMEM64</i>   | 8:91634222-91658133    | 4.64648 | 6.03296 | 0.376729 | 2.03862 | 0.00195  | 0.029568  | yes |
| <i>B4GALT6</i>  | 18:29202208-29264686   | 2.24166 | 2.91037 | 0.376632 | 2.14313 | 0.00115  | 0.0196005 | yes |
| <i>ADRB2</i>    | 5:148206155-148208197  | 14.1292 | 18.332  | 0.375685 | 1.98578 | 0.0012   | 0.0202526 | yes |
| <i>SLC27A3</i>  | 1:153747767-153752633  | 3.76613 | 4.88585 | 0.375525 | 1.90544 | 0.00275  | 0.0384332 | yes |
| <i>DEK</i>      | 6:18224399-18264799    | 106.796 | 138.385 | 0.373824 | 2.15828 | 7.00E-04 | 0.0135861 | yes |
| <i>CYR61</i>    | 1:86046443-86049650    | 289.39  | 374.948 | 0.373677 | 2.12076 | 9.00E-04 | 0.0166758 | yes |
| <i>FNIP2</i>    | 4:159690181-159956333  | 1.9418  | 2.51518 | 0.373269 | 1.83727 | 9.00E-04 | 0.0166758 | yes |
| <i>RFC2</i>     | 7:73645831-73668738    | 28.4242 | 36.8036 | 0.372727 | 1.66494 | 0.00205  | 0.0305767 | yes |
| <i>TYRO3</i>    | 15:41851219-41871536   | 2.44928 | 3.17119 | 0.372665 | 1.73879 | 0.0013   | 0.0216115 | yes |
| <i>NCKAP5</i>   | 2:133429371-134326031  | 1.60282 | 2.07356 | 0.371497 | 1.75757 | 0.00225  | 0.0328344 | yes |
| <i>ORC6</i>     | 16:46723557-46732306   | 16.8511 | 21.7767 | 0.369939 | 1.74155 | 0.0026   | 0.036767  | yes |
| <i>TUSC1</i>    | 9:25676386-25678856    | 7.1945  | 9.29442 | 0.36947  | 2.48258 | 0.0025   | 0.0356451 | yes |



|                 |                        |         |         |          |         |          |           |     |
|-----------------|------------------------|---------|---------|----------|---------|----------|-----------|-----|
| <i>RECQL4</i>   | 8:145736666-145743210  | 7.08679 | 9.14224 | 0.367415 | 1.87797 | 0.0012   | 0.0202526 | yes |
| <i>TSFM</i>     | 12:58176527-58209852   | 11.0727 | 14.2834 | 0.367339 | 1.65928 | 0.0037   | 0.0476763 | yes |
| <i>C17orf89</i> | 17:79213110-79215098   | 49.9351 | 64.3844 | 0.366658 | 3.01314 | 0.00135  | 0.0222521 | yes |
| <i>GPHN</i>     | 14:66974124-67648525   | 4.63514 | 5.97245 | 0.365711 | 1.77836 | 0.00205  | 0.0305767 | yes |
| <i>STARD7</i>   | 2:96850596-96908361    | 35.8495 | 46.1829 | 0.365405 | 2.03115 | 0.0013   | 0.0216115 | yes |
| <i>FOXC1</i>    | 6:1610680-1614132      | 3.26278 | 4.20324 | 0.365398 | 2.32628 | 0.00255  | 0.0361588 | yes |
| <i>SLC2A1</i>   | 1:43391045-43449029    | 58.6163 | 75.4962 | 0.365102 | 2.05472 | 0.00055  | 0.0112366 | yes |
| <i>APEX2</i>    | X:55026779-55034212    | 18.1598 | 23.3889 | 0.365077 | 2.00812 | 0.00195  | 0.029568  | yes |
| <i>CCDC138</i>  | 2:109403218-109492847  | 5.49468 | 7.0758  | 0.364856 | 2.19705 | 0.0019   | 0.0290653 | yes |
| <i>UROS</i>     | 10:127477146-127511837 | 20.5655 | 26.4744 | 0.364371 | 1.82747 | 0.00175  | 0.0273088 | yes |
| <i>POLA2</i>    | 11:65029431-65065088   | 12.7185 | 16.3697 | 0.364097 | 1.91588 | 0.00155  | 0.0248368 | yes |
| <i>TMEM161A</i> | 19:19230424-19249310   | 9.94321 | 12.797  | 0.364023 | 1.73806 | 0.0032   | 0.0433186 | yes |
| <i>HS2ST1</i>   | 1:87380334-87575681    | 5.66681 | 7.28995 | 0.363371 | 1.82879 | 0.00355  | 0.0461649 | yes |
| <i>MEGF8</i>    | 19:42829760-42882921   | 3.37953 | 4.34515 | 0.362586 | 1.72284 | 0.00175  | 0.0273088 | yes |
| <i>OAT</i>      | 10:126085871-126107545 | 92.2267 | 118.544 | 0.362167 | 2.03482 | 0.00095  | 0.0173333 | yes |
| <i>MT1X</i>     | 16:56716381-56718108   | 441.683 | 567.628 | 0.361933 | 4.22899 | 8.00E-04 | 0.0151114 | yes |
| <i>POLD3</i>    | 11:74303574-74354105   | 9.99221 | 12.8247 | 0.360051 | 1.91226 | 0.00165  | 0.0260097 | yes |
| <i>CDC45</i>    | 22:19467413-19508135   | 21.9907 | 28.1988 | 0.358743 | 1.62111 | 0.0038   | 0.048682  | yes |
| <i>NCAPD3</i>   | 11:134022336-134094426 | 13.3235 | 17.0843 | 0.358695 | 1.95105 | 0.00115  | 0.0196005 | yes |
| <i>TCTN3</i>    | 10:97423152-97453900   | 17.5462 | 22.494  | 0.358382 | 1.89472 | 0.00115  | 0.0196005 | yes |
| <i>TTI1</i>     | 20:36611422-36661833   | 17.055  | 21.8478 | 0.357297 | 1.83911 | 0.00115  | 0.0196005 | yes |
| <i>HSPH1</i>    | 13:31710761-31736117   | 71.8067 | 91.9703 | 0.357051 | 2.09628 | 0.00115  | 0.0196005 | yes |
| <i>PAICS</i>    | 4:57301914-57327534    | 127.85  | 163.75  | 0.357037 | 1.85114 | 0.00125  | 0.0209598 | yes |
| <i>POLR2D</i>   | 2:128603839-128615729  | 15.6703 | 20.0663 | 0.356744 | 1.91384 | 0.0016   | 0.025428  | yes |
| <i>RFWD3</i>    | 16:74655296-74700779   | 14.283  | 18.2749 | 0.355568 | 1.75865 | 0.0011   | 0.0190409 | yes |
| <i>MIPEP</i>    | 13:24304327-24471125   | 10.0121 | 12.793  | 0.35361  | 1.80077 | 0.0025   | 0.0356451 | yes |
| <i>TM7SF3</i>   | 12:27124502-27167339   | 14.6666 | 18.7284 | 0.352687 | 1.88178 | 0.00155  | 0.0248368 | yes |
| <i>GJA3</i>     | 13:20712393-20735183   | 2.30879 | 2.94674 | 0.351982 | 2.00929 | 0.00205  | 0.0305767 | yes |
| <i>ERMP1</i>    | 9:5784571-5833081      | 12.0917 | 15.4287 | 0.351592 | 1.88662 | 0.00165  | 0.0260097 | yes |
| <i>C20orf27</i> | 20:3734145-3749035     | 46.3803 | 59.1434 | 0.350705 | 1.58309 | 0.0015   | 0.0242609 | yes |
| <i>CENPQ</i>    | 6:49431095-49460820    | 13.9042 | 17.7229 | 0.350095 | 2.88602 | 0.0023   | 0.0333446 | yes |
| <i>IMP3</i>     | 15:75931425-75932664   | 42.1058 | 53.6462 | 0.349458 | 2.37224 | 0.0017   | 0.0266895 | yes |
| <i>ICMT</i>     | 1:6266188-6296044      | 24.7778 | 31.5434 | 0.348292 | 1.86884 | 0.001    | 0.0178882 | yes |
| <i>IGFBP6</i>   | 12:53491435-53496128   | 25.9434 | 33.0209 | 0.348015 | 1.87075 | 0.0032   | 0.0433186 | yes |

|                 |                        |         |         |          |         |         |           |     |
|-----------------|------------------------|---------|---------|----------|---------|---------|-----------|-----|
| <i>IER3IP1</i>  | 18:44681389-44702745   | 31.7457 | 40.3918 | 0.347501 | 2.43399 | 0.0022  | 0.0322563 | yes |
| <i>TRMT10C</i>  | 3:101280711-101285089  | 30.462  | 38.7029 | 0.34543  | 2.22531 | 0.0023  | 0.0333446 | yes |
| <i>FANCG</i>    | 9:35073834-35080013    | 9.42676 | 11.9745 | 0.345132 | 1.70976 | 0.0037  | 0.0476763 | yes |
| <i>RMI2</i>     | 16:11439310-11445617   | 15.4221 | 19.5832 | 0.344622 | 2.06623 | 0.0038  | 0.048682  | yes |
| <i>MAPRE2</i>   | 18:32556891-32723434   | 5.97976 | 7.59261 | 0.344509 | 1.69802 | 0.00275 | 0.0384332 | yes |
| <i>DHCR7</i>    | 11:71145456-71159477   | 82.8377 | 105.176 | 0.344451 | 1.82541 | 0.00175 | 0.0273088 | yes |
| <i>MSMO1</i>    | 4:166248817-166264316  | 176.863 | 224.318 | 0.342919 | 1.91471 | 0.00285 | 0.0394402 | yes |
| <i>SAP30</i>    | 4:174292092-174298683  | 12.4711 | 15.8051 | 0.341808 | 2.16156 | 0.00385 | 0.0490393 | yes |
| <i>MRC2</i>     | 17:60704761-60770962   | 4.00278 | 5.07102 | 0.341274 | 1.71407 | 0.00365 | 0.0471886 | yes |
| <i>MZT2A</i>    | 2:132241532-132250064  | 66.1    | 83.7338 | 0.341161 | 2.27831 | 0.00265 | 0.0373042 | yes |
| <i>NPAT</i>     | 11:108028116-108093365 | 5.68964 | 7.20677 | 0.341016 | 2.01132 | 0.00245 | 0.0351582 | yes |
| <i>ZMYND19</i>  | 9:140476530-140484937  | 24.3512 | 30.8284 | 0.340266 | 2.03205 | 0.0034  | 0.0448528 | yes |
| <i>ATG4C</i>    | 1:63249776-63330941    | 6.15066 | 7.78632 | 0.340201 | 1.99156 | 0.00165 | 0.0260097 | yes |
| <i>NCOA5</i>    | 20:44689623-44718580   | 15.5481 | 19.6745 | 0.339588 | 1.75608 | 0.0025  | 0.0356451 | yes |
| <i>SRD5A1</i>   | 5:6633499-6669675      | 6.35781 | 8.02398 | 0.335788 | 1.99813 | 0.00325 | 0.0436529 | yes |
| <i>MTERF</i>    | 7:91502020-91510016    | 6.39771 | 8.07257 | 0.335473 | 1.96186 | 0.00355 | 0.0461649 | yes |
| <i>TOPBP1</i>   | 3:133319448-133380737  | 17.6491 | 22.2587 | 0.334777 | 2.02827 | 0.00185 | 0.0285536 | yes |
| <i>PTDSS1</i>   | 8:97274166-97346774    | 44.6494 | 56.3056 | 0.334636 | 1.82549 | 0.00215 | 0.0316727 | yes |
| <i>FSD1</i>     | 19:4304590-4323843     | 7.69009 | 9.69694 | 0.334529 | 1.90104 | 0.00345 | 0.0452052 | yes |
| <i>FASN</i>     | 17:80036213-80056106   | 68.8301 | 86.7912 | 0.33451  | 1.74761 | 0.00255 | 0.0361588 | yes |
| <i>PIGU</i>     | 20:33148345-33265089   | 20.7146 | 26.1072 | 0.333804 | 1.93193 | 0.00335 | 0.0444197 | yes |
| <i>FAM20C</i>   | 7:192968-300740        | 17.9744 | 22.6455 | 0.333286 | 2.06617 | 0.003   | 0.0412221 | yes |
| <i>FADS2</i>    | 11:61595712-61634825   | 204.888 | 258.088 | 0.333026 | 1.65259 | 0.0027  | 0.0378707 | yes |
| <i>CSE1L</i>    | 20:47662782-47713497   | 147.949 | 186.293 | 0.332474 | 2.01403 | 0.0027  | 0.0378707 | yes |
| <i>DNAJA1</i>   | 9:33025208-33039062    | 157.717 | 198.548 | 0.332151 | 2.02746 | 0.00185 | 0.0285536 | yes |
| <i>MARS2</i>    | 2:198570027-198573114  | 4.28583 | 5.39482 | 0.332    | 1.85629 | 0.0034  | 0.0448528 | yes |
| <i>RPA1</i>     | 17:1733272-1802848     | 26.0161 | 32.722  | 0.330855 | 1.86551 | 0.0021  | 0.031143  | yes |
| <i>GBP1</i>     | 1:89517986-89531043    | 4.98456 | 6.26721 | 0.330358 | 1.79029 | 0.0031  | 0.0423712 | yes |
| <i>TRAM1</i>    | 8:71485452-71520694    | 136.304 | 171.327 | 0.329923 | 1.98145 | 0.00335 | 0.0444197 | yes |
| <i>TCF7L1</i>   | 2:85360582-85537511    | 18.3368 | 23.0379 | 0.329269 | 2.0356  | 0.0034  | 0.0448528 | yes |
| <i>POLE</i>     | 12:133200347-133263945 | 8.08654 | 10.1553 | 0.328642 | 1.71829 | 0.0036  | 0.0466198 | yes |
| <i>LRRC58</i>   | 3:120043575-120068186  | 8.17306 | 10.2601 | 0.328095 | 2.02229 | 0.00275 | 0.0384332 | yes |
| <i>NTHL1</i>    | 16:2089815-2097867     | 13.8197 | 17.3403 | 0.327402 | 1.94114 | 0.00335 | 0.0444197 | yes |
| <i>EIF4EBP2</i> | 10:72163860-72188374   | 10.3648 | 13.0027 | 0.327118 | 1.73271 | 0.0022  | 0.0322563 | yes |

|                 |                        |         |         |           |          |         |           |     |
|-----------------|------------------------|---------|---------|-----------|----------|---------|-----------|-----|
| <i>SFXN1</i>    | 5:174905513-174955621  | 57.8082 | 72.4774 | 0.326259  | 2.12646  | 0.0027  | 0.0378707 | yes |
| <i>DCTPP1</i>   | 16:30435018-30441373   | 39.0694 | 48.9823 | 0.326222  | 1.87109  | 0.00345 | 0.0452052 | yes |
| <i>COX18</i>    | 4:73920415-73935472    | 2.63083 | 3.29552 | 0.324986  | 1.74158  | 0.0033  | 0.0440577 | yes |
| <i>RNF130</i>   | 5:179382473-179499109  | 32.1812 | 40.3009 | 0.324594  | 2.03787  | 0.0036  | 0.0466199 | yes |
| <i>LIPA</i>     | 10:90973325-91011660   | 32.5739 | 40.7514 | 0.323134  | 1.64195  | 0.0031  | 0.0423712 | yes |
| <i>FBN2</i>     | 5:127593600-127873735  | 16.9404 | 21.1875 | 0.322742  | 1.76479  | 0.00265 | 0.0373042 | yes |
| <i>MLEC</i>     | 12:121124948-121139667 | 23.7533 | 29.6068 | 0.317801  | 1.55777  | 0.0033  | 0.0440577 | yes |
| <i>SQLE</i>     | 8:126010719-126034525  | 123.656 | 154.05  | 0.317071  | 1.8225   | 0.0034  | 0.0448528 | yes |
| <i>PGRMC1</i>   | X:118370210-118378429  | 58.6218 | 72.9999 | 0.316458  | 2.14282  | 0.0035  | 0.0457061 | yes |
| <i>PARP1</i>    | 1:226548391-226595801  | 44.1498 | 54.8118 | 0.312081  | 1.5998   | 0.0028  | 0.0389566 | yes |
| <i>KCTD12</i>   | 13:77454303-77460540   | 26.4591 | 32.8137 | 0.310533  | 1.94193  | 0.00385 | 0.0490393 | yes |
| <i>BNIP3</i>    | 10:133781203-133795435 | 122.5   | 151.634 | 0.307813  | 2.07503  | 0.00385 | 0.0490393 | yes |
| <i>TNFRSF1A</i> | 12:6437922-6451283     | 66.707  | 53.7823 | -0.310706 | -1.81841 | 0.00325 | 0.0436529 | yes |
| <i>MRPS5</i>    | 2:95752951-95787754    | 59.1026 | 47.6062 | -0.312071 | -1.76557 | 0.0037  | 0.0476763 | yes |
| <i>PSMD4</i>    | 1:151227196-151239955  | 112.62  | 90.6093 | -0.313728 | -1.83215 | 0.0033  | 0.0440577 | yes |
| <i>JUP</i>      | 17:39910858-39942964   | 158.603 | 126.977 | -0.320861 | -1.5713  | 0.00335 | 0.0444197 | yes |
| <i>NBR1</i>     | 17:41322497-41363707   | 28.876  | 23.1107 | -0.321313 | -1.65989 | 0.00315 | 0.0429412 | yes |
| <i>KIF14</i>    | 1:200520624-200589862  | 10.8773 | 8.70221 | -0.321868 | -1.8745  | 0.00385 | 0.0490393 | yes |
| <i>C6orf48</i>  | 6:31802692-31807541    | 153.771 | 122.959 | -0.322611 | -2.04111 | 0.0035  | 0.0457061 | yes |
| <i>CENPE</i>    | 4:104026962-104119566  | 15.6142 | 12.4829 | -0.322904 | -2.28733 | 0.0023  | 0.0333446 | yes |
| <i>VCP</i>      | 9:35056064-35072739    | 147.084 | 117.51  | -0.323857 | -1.70215 | 0.0032  | 0.0433186 | yes |
| <i>EMG1</i>     | 12:7079943-7085165     | 83.9377 | 67.0276 | -0.324563 | -1.89946 | 0.00285 | 0.0394402 | yes |
| <i>EIF5</i>     | 14:103800338-103811362 | 57.1415 | 45.5792 | -0.326163 | -1.74786 | 0.00345 | 0.0452052 | yes |
| <i>SMCHD1</i>   | 18:2655885-2805015     | 18.2299 | 14.5407 | -0.32621  | -1.94688 | 0.002   | 0.0300911 | yes |
| <i>TMEM40</i>   | 3:12775391-12800808    | 85.8124 | 68.417  | -0.326831 | -1.74831 | 0.00255 | 0.0361588 | yes |
| <i>PRKAB2</i>   | 1:146626684-146644129  | 13.7503 | 10.9614 | -0.327029 | -1.74409 | 0.0033  | 0.0440577 | yes |
| <i>HYOU1</i>    | 11:118914895-118927925 | 66.1065 | 52.6672 | -0.327887 | -1.56136 | 0.0033  | 0.0440577 | yes |
| <i>CSTA</i>     | 3:122044010-122060816  | 252.181 | 200.873 | -0.328176 | -3.15943 | 0.0025  | 0.0356451 | yes |
| <i>TRIB3</i>    | 20:361307-378203       | 166.925 | 132.935 | -0.328481 | -1.97836 | 0.00195 | 0.029568  | yes |
| <i>ETV5</i>     | 3:185764105-185826901  | 15.1671 | 12.0696 | -0.329577 | -1.72579 | 0.00375 | 0.0481607 | yes |
| <i>CMAS</i>     | 12:22199109-22218608   | 45.2682 | 36.0118 | -0.330027 | -2.07302 | 0.00315 | 0.0429412 | yes |
| <i>UTP3</i>     | 4:71554195-71556268    | 47.1248 | 37.4753 | -0.330544 | -1.83166 | 0.00225 | 0.0328344 | yes |
| <i>FABP5</i>    | 8:82192717-82197012    | 336.642 | 267.546 | -0.331427 | -2.48647 | 0.0022  | 0.0322563 | yes |
| <i>ZFAND3</i>   | 6:37787306-38122400    | 28.6096 | 22.7324 | -0.331751 | -1.71079 | 0.002   | 0.0300911 | yes |

|                 |                        |         |         |           |          |          |           |     |
|-----------------|------------------------|---------|---------|-----------|----------|----------|-----------|-----|
| <i>TRIP10</i>   | 19:6739706-6751529     | 74.3563 | 59.0747 | -0.331915 | -1.99597 | 0.0025   | 0.0356451 | yes |
| <i>COPG1</i>    | 3:128968452-128996616  | 59.1976 | 47.0209 | -0.332235 | -1.77947 | 0.00155  | 0.0248368 | yes |
| <i>SNX9</i>     | 6:158244293-158366109  | 33.9181 | 26.9063 | -0.334112 | -1.90753 | 0.00175  | 0.0273088 | yes |
| <i>MAFG</i>     | 17:79876144-79885587   | 7.97047 | 6.32227 | -0.334221 | -1.535   | 0.00335  | 0.0444197 | yes |
| <i>MBOAT2</i>   | 2:8996700-9143876      | 30.8383 | 24.4203 | -0.336641 | -2.05086 | 0.0026   | 0.036767  | yes |
| <i>DSG3</i>     | 18:29027731-29058665   | 17.7744 | 14.0738 | -0.33679  | -1.84834 | 0.0019   | 0.0290653 | yes |
| <i>ASB1</i>     | 2:239335625-239360891  | 13.8339 | 10.9513 | -0.337112 | -1.66342 | 0.002    | 0.0300911 | yes |
| <i>SH3PXD2A</i> | 10:105353783-105615164 | 22.9334 | 18.1531 | -0.337235 | -1.57303 | 0.00265  | 0.0373042 | yes |
| <i>TNFAIP3</i>  | 6:138144805-138204451  | 18.2774 | 14.462  | -0.337788 | -1.80198 | 0.00235  | 0.0339427 | yes |
| <i>ZNF259</i>   | 11:116649275-116658739 | 49.6042 | 39.2126 | -0.339146 | -1.99045 | 0.0021   | 0.031143  | yes |
| <i>PRDM15</i>   | 21:43218384-43299591   | 2.29674 | 1.81512 | -0.339519 | -1.7151  | 0.003    | 0.0412221 | yes |
| <i>KIF2C</i>    | 1:45205489-45233439    | 26.4987 | 20.9416 | -0.339551 | -1.86933 | 0.00155  | 0.0248368 | yes |
| <i>ZXDB</i>     | X:57618268-57623910    | 13.4294 | 10.6051 | -0.340634 | -1.93513 | 0.00195  | 0.029568  | yes |
| <i>ANKRD11</i>  | 16:89334028-89556969   | 36.7029 | 28.9837 | -0.340654 | -1.99503 | 0.002    | 0.0300911 | yes |
| <i>TPBG</i>     | 6:83072922-83077134    | 90.7361 | 71.6452 | -0.340806 | -2.06093 | 0.0019   | 0.0290653 | yes |
| <i>HBEGF</i>    | 5:139712427-139726188  | 41.8774 | 33.052  | -0.341436 | -1.93307 | 0.0017   | 0.0266895 | yes |
| <i>ANXA7</i>    | 10:75135188-75173841   | 63.1071 | 49.798  | -0.341715 | -1.74155 | 9.00E-04 | 0.0166758 | yes |
| <i>CCNB2</i>    | 15:59397283-59417244   | 55.3876 | 43.7047 | -0.341774 | -2.17542 | 0.0019   | 0.0290653 | yes |
| <i>SFN</i>      | 1:27189632-27190947    | 1400.28 | 1104.82 | -0.341907 | -1.95096 | 0.00355  | 0.0461649 | yes |
| <i>METTL10</i>  | 10:126447405-126480439 | 9.11936 | 7.19217 | -0.342505 | -1.92027 | 0.00245  | 0.0351582 | yes |
| <i>NDE1</i>     | 16:15737123-15950887   | 15.8116 | 12.4694 | -0.342584 | -1.79757 | 0.0028   | 0.0389566 | yes |
| <i>WNT7A</i>    | 3:13860081-13921618    | 27.1508 | 21.3986 | -0.343478 | -2.08459 | 0.0032   | 0.0433186 | yes |
| <i>CTSL2</i>    | 9:99791958-99801925    | 6.52111 | 5.13826 | -0.343835 | -1.72639 | 0.00335  | 0.0444197 | yes |
| <i>SRGN</i>     | 10:70847827-70864567   | 68.1211 | 53.6703 | -0.343978 | -1.8788  | 0.00195  | 0.029568  | yes |
| <i>VAMP8</i>    | 2:85804613-85809156    | 110.622 | 87.1493 | -0.344077 | -2.32841 | 0.00205  | 0.0305767 | yes |
| <i>CDK7</i>     | 5:68530621-68573257    | 48.2278 | 37.9706 | -0.344983 | -2.0163  | 0.0019   | 0.0290653 | yes |
| <i>EIF4A2</i>   | 3:186501360-186524484  | 201.484 | 158.589 | -0.345374 | -1.85178 | 0.0035   | 0.0457061 | yes |
| <i>C5orf28</i>  | 5:43444353-43483992    | 5.3027  | 4.17352 | -0.345463 | -2.00406 | 0.00385  | 0.0490393 | yes |
| <i>GANC</i>     | 15:42566365-42645864   | 4.90112 | 3.85739 | -0.345489 | -1.76333 | 0.00265  | 0.0373042 | yes |
| <i>FER</i>      | 5:108083522-108523373  | 10.3307 | 8.1286  | -0.345858 | -2.06991 | 0.00305  | 0.0418351 | yes |
| <i>YARS</i>     | 1:33240839-33324480    | 91.0475 | 71.6215 | -0.346226 | -1.75087 | 0.00325  | 0.0436529 | yes |
| <i>AP1G2</i>    | 14:23980968-24048009   | 24.5682 | 19.3258 | -0.346263 | -1.6866  | 0.00245  | 0.0351582 | yes |
| <i>DYNLRB1</i>  | 20:33104203-33128762   | 377.205 | 296.608 | -0.346792 | -2.69852 | 0.00135  | 0.0222521 | yes |
| <i>GTF2F1</i>   | 19:6379579-6393291     | 52.3415 | 41.1543 | -0.346911 | -1.94951 | 0.00145  | 0.0237491 | yes |

|                 |                        |         |         |           |          |          |           |     |
|-----------------|------------------------|---------|---------|-----------|----------|----------|-----------|-----|
| <i>SAMD8</i>    | 10:76871392-76941881   | 9.44852 | 7.42801 | -0.347112 | -1.71276 | 0.00285  | 0.0394402 | yes |
| <i>IRF1</i>     | 5:131817300-131826465  | 5.43951 | 4.27468 | -0.34766  | -1.70606 | 0.0029   | 0.0399896 | yes |
| <i>NMT2</i>     | 10:15147770-15210695   | 4.63535 | 3.64234 | -0.347815 | -1.76354 | 0.00325  | 0.0436529 | yes |
| <i>KDM5C</i>    | X:53220502-53254604    | 27.4583 | 21.5751 | -0.347873 | -1.67832 | 0.00215  | 0.0316727 | yes |
| <i>TNKS1BP1</i> | 11:57067102-57092413   | 42.0636 | 33.0403 | -0.348345 | -1.681   | 0.00105  | 0.0185265 | yes |
| <i>TBC1D22A</i> | 22:47158517-47571342   | 6.88265 | 5.40513 | -0.348636 | -1.70456 | 0.0036   | 0.0466199 | yes |
| <i>ZNF710</i>   | 15:90544751-90625432   | 9.32119 | 7.31979 | -0.348712 | -1.65003 | 0.002    | 0.0300911 | yes |
| <i>CCS</i>      | 11:66360689-66373490   | 14.8491 | 11.6601 | -0.348793 | -1.77511 | 0.002    | 0.0300911 | yes |
| <i>EIF4E3</i>   | 3:71728439-71804328    | 2.78509 | 2.18625 | -0.349263 | -1.87312 | 0.00285  | 0.0394402 | yes |
| <i>FGFRL1</i>   | 4:1005609-1020686      | 12.4601 | 9.77243 | -0.350525 | -1.68064 | 0.00245  | 0.0351582 | yes |
| <i>NDUFA13</i>  | 19:19627018-19639013   | 271.476 | 212.648 | -0.352359 | -2.76028 | 0.0013   | 0.0216115 | yes |
| <i>ASAP2</i>    | 2:9346893-9545812      | 39.1289 | 30.6386 | -0.352883 | -1.9206  | 0.00375  | 0.0481607 | yes |
| <i>DNER</i>     | 2:230222344-230579286  | 27.6555 | 21.6485 | -0.353302 | -2.15712 | 0.00165  | 0.0260097 | yes |
| <i>KIAA0556</i> | 16:27561467-27791692   | 4.53957 | 3.55134 | -0.354191 | -1.70409 | 0.00205  | 0.0305767 | yes |
| <i>LMBR1L</i>   | 12:49490921-49504680   | 6.47867 | 5.06754 | -0.354411 | -1.82636 | 0.0016   | 0.025428  | yes |
| <i>ITGB4</i>    | 17:73717515-73753899   | 330.698 | 258.603 | -0.354776 | -1.72684 | 0.0023   | 0.0333446 | yes |
| <i>GRIPAP1</i>  | X:48830133-48858675    | 13.8919 | 10.8597 | -0.355267 | -1.59723 | 0.00325  | 0.0436529 | yes |
| <i>TRIM56</i>   | 7:100728785-100733909  | 10.6573 | 8.32609 | -0.356135 | -1.68228 | 0.002    | 0.0300911 | yes |
| <i>EREG</i>     | 4:75230859-75254477    | 29.1705 | 22.7745 | -0.357092 | -2.10984 | 0.0013   | 0.0216115 | yes |
| <i>RPL37</i>    | 5:40831429-40835387    | 631.565 | 492.689 | -0.358254 | -1.60092 | 0.0013   | 0.0216115 | yes |
| <i>GNA15</i>    | 19:3136190-3163766     | 56.7351 | 44.2591 | -0.358268 | -1.94026 | 0.00115  | 0.0196005 | yes |
| <i>PWP1</i>     | 12:108079589-108106257 | 59.3859 | 46.3095 | -0.358812 | -1.98311 | 0.00095  | 0.0173333 | yes |
| <i>TMEM173</i>  | 5:138855112-138862343  | 12.8807 | 10.0426 | -0.359084 | -1.79966 | 0.00195  | 0.029568  | yes |
| <i>EIF2S2</i>   | 20:32676114-32700085   | 265.273 | 206.772 | -0.359441 | -1.94233 | 0.00105  | 0.0185265 | yes |
| <i>CDCA3</i>    | 12:6957971-6960456     | 27.1349 | 21.1442 | -0.359886 | -2.09923 | 0.0023   | 0.0333446 | yes |
| <i>SEMA3C</i>   | 7:80371853-80548667    | 36.5666 | 28.4852 | -0.360315 | -2.23019 | 0.00075  | 0.0143591 | yes |
| <i>FIS1</i>     | 7:100882892-100888371  | 156.1   | 121.516 | -0.361319 | -2.4452  | 0.001    | 0.0178882 | yes |
| <i>BPGM</i>     | 7:134331530-134364568  | 20.4183 | 15.8934 | -0.361433 | -1.88214 | 0.00135  | 0.0222521 | yes |
| <i>CDK5RAP3</i> | 17:46048428-46059147   | 35.4512 | 27.5846 | -0.361969 | -1.94698 | 0.00115  | 0.0196005 | yes |
| <i>CORO1A</i>   | 16:30194730-30200397   | 6.76143 | 5.25965 | -0.362361 | -1.64567 | 0.00235  | 0.0339427 | yes |
| <i>PRR11</i>    | 17:57232859-57284070   | 24.9844 | 19.4313 | -0.362647 | -1.9294  | 8.00E-04 | 0.0151114 | yes |
| <i>ATXN1</i>    | 6:16299342-16761721    | 2.05333 | 1.59648 | -0.363073 | -1.73174 | 0.00125  | 0.0209598 | yes |
| <i>EHBP1L1</i>  | 11:65343508-65360116   | 23.582  | 18.3223 | -0.364081 | -1.65098 | 0.00085  | 0.0159588 | yes |
| <i>SLCO2A1</i>  | 3:133651539-133748920  | 4.7045  | 3.65457 | -0.36434  | -1.77862 | 0.0018   | 0.0279207 | yes |

|                  |                        |          |          |           |          |          |           |     |
|------------------|------------------------|----------|----------|-----------|----------|----------|-----------|-----|
| <i>FAIM</i>      | 3:138327541-138352218  | 16.1255  | 12.5225  | -0.364815 | -1.823   | 0.0032   | 0.0433186 | yes |
| <i>PAF1</i>      | 19:39876268-39881835   | 44.5831  | 34.609   | -0.365352 | -1.64551 | 0.0018   | 0.0279207 | yes |
| <i>DVL1</i>      | 1:1270657-1284492      | 53.4959  | 41.5214  | -0.365571 | -2.02814 | 0.00045  | 0.0095063 | yes |
| <i>TUBB6</i>     | 18:12308256-12326568   | 1149.2   | 891.925  | -0.365637 | -2.12377 | 0.00175  | 0.0273088 | yes |
| <i>FAM167A</i>   | 8:11197145-11324276    | 5.76763  | 4.47341  | -0.366603 | -1.62715 | 0.00175  | 0.0273088 | yes |
| <i>FAM83G</i>    | 17:18853988-18950336   | 13.6095  | 10.5546  | -0.366745 | -1.83176 | 0.0021   | 0.031143  | yes |
| <i>NEDD9</i>     | 6:11183530-11382581    | 8.99526  | 6.97523  | -0.366924 | -1.74271 | 0.00225  | 0.0328344 | yes |
| <i>OSTF1</i>     | 9:77703397-77762114    | 36.8357  | 28.5605  | -0.367082 | -2.35523 | 0.001    | 0.0178882 | yes |
| <i>EIF5A2</i>    | 3:170606203-170626426  | 6.97345  | 5.40414  | -0.367809 | -2.25714 | 0.00165  | 0.0260097 | yes |
| <i>HNRNPA2B1</i> | 7:26229555-26240413    | 450.332  | 348.841  | -0.368418 | -1.64129 | 0.0036   | 0.0466199 | yes |
| <i>LENG8</i>     | 19:54960064-54974894   | 31.7198  | 24.5698  | -0.3685   | -2.02874 | 0.00105  | 0.0185265 | yes |
| <i>C6orf132</i>  | 6:42068856-42110715    | 6.06933  | 4.70055  | -0.368706 | -1.72217 | 0.00075  | 0.0143591 | yes |
| <i>FLOT1</i>     | 6:30695510-30710453    | 34.3347  | 26.5734  | -0.369685 | -1.97302 | 0.001    | 0.0178882 | yes |
| <i>TFE3</i>      | X:48886241-48900990    | 24.7423  | 19.1441  | -0.370075 | -1.85167 | 0.0011   | 0.0190409 | yes |
| <i>KDM4A</i>     | 1:44115796-44173012    | 17.337   | 13.4141  | -0.370104 | -1.8172  | 6.00E-04 | 0.0120833 | yes |
| <i>SEMA4C</i>    | 2:97525472-97535735    | 5.4872   | 4.24539  | -0.370172 | -1.80379 | 0.00105  | 0.0185265 | yes |
| <i>PRDX5</i>     | 11:64085559-64089295   | 280.446  | 216.809  | -0.371296 | -1.75875 | 0.0011   | 0.0190409 | yes |
| <i>HIP1R</i>     | 12:123320038-123347507 | 15.8695  | 12.266   | -0.371597 | -1.93134 | 6.00E-04 | 0.0120833 | yes |
| <i>ZHX2</i>      | 8:123793900-123986755  | 5.38684  | 4.16152  | -0.372328 | -1.89596 | 0.00155  | 0.0248368 | yes |
| <i>HRH1</i>      | 3:11178778-11304939    | 7.1815   | 5.54244  | -0.373765 | -1.79244 | 0.0015   | 0.0242609 | yes |
| <i>RNF220</i>    | 1:44870959-45117396    | 30.0126  | 23.1601  | -0.37393  | -1.75358 | 7.00E-04 | 0.0135861 | yes |
| <i>H6PD</i>      | 1:9294862-9331396      | 2.3006   | 1.77363  | -0.375312 | -1.80244 | 0.0019   | 0.0290653 | yes |
| <i>TAOK3</i>     | 12:118587605-118810750 | 18.5377  | 14.2913  | -0.375318 | -2.15713 | 7.00E-04 | 0.0135861 | yes |
| <i>TMC6</i>      | 17:76108998-76139049   | 11.8402  | 9.1248   | -0.375828 | -1.97793 | 0.0012   | 0.0202526 | yes |
| <i>KIF4A</i>     | X:69509878-69640774    | 15.7435  | 12.1316  | -0.375987 | -2.02279 | 0.00075  | 0.0143591 | yes |
| <i>MALL</i>      | 2:110841446-110874143  | 18.0483  | 13.9064  | -0.376114 | -1.92362 | 0.00065  | 0.0128896 | yes |
| <i>SEC24D</i>    | 4:119643977-119757326  | 26.7677  | 20.6217  | -0.376332 | -2.08969 | 3.00E-04 | 0.0068401 | yes |
| <i>DDX60L</i>    | 4:169277885-169401638  | 2.74763  | 2.11509  | -0.377468 | -2.15358 | 0.001    | 0.0178882 | yes |
| <i>CLSTN3</i>    | 12:7282966-7311541     | 6.10621  | 4.70023  | -0.377545 | -1.73353 | 0.00115  | 0.0196005 | yes |
| <i>N4BP2</i>     | 4:40044536-40159872    | 3.10242  | 2.38776  | -0.377736 | -2.04719 | 0.0015   | 0.0242609 | yes |
| <i>MARS</i>      | 12:57881735-57914300   | 122.658  | 94.3559  | -0.378458 | -2.00578 | 8.00E-04 | 0.0151114 | yes |
| <i>PPP4R4</i>    | 14:94640648-94746072   | 9.83922  | 7.56796  | -0.378639 | -2.14389 | 0.0018   | 0.0279207 | yes |
| <i>LYST</i>      | 1:235824342-236030220  | 0.838334 | 0.644295 | -0.379804 | -1.85379 | 0.00215  | 0.0316727 | yes |
| <i>TAF13</i>     | 1:109606997-109618624  | 50.9354  | 39.1453  | -0.379831 | -2.76063 | 0.00115  | 0.0196005 | yes |

|                 |                        |         |         |           |          |          |           |     |
|-----------------|------------------------|---------|---------|-----------|----------|----------|-----------|-----|
| <i>DRAP1</i>    | 11:65686727-65689048   | 315.462 | 242.424 | -0.379931 | -2.48545 | 3.00E-04 | 0.0068401 | yes |
| <i>HNRNPH3</i>  | 10:70042416-70102953   | 119.854 | 92.0859 | -0.380229 | -1.62329 | 0.00345  | 0.0452052 | yes |
| <i>GDI1</i>     | X:153665258-153671814  | 55.8123 | 42.8609 | -0.380923 | -1.97053 | 0.00025  | 0.0059445 | yes |
| <i>DHRS1</i>    | 14:24759803-24769039   | 18.6191 | 14.2969 | -0.381075 | -1.72967 | 0.001    | 0.0178882 | yes |
| <i>ITPKC</i>    | 19:41223007-41255828   | 12.198  | 9.36543 | -0.381227 | -1.72535 | 0.0028   | 0.0389566 | yes |
| <i>TGFB1</i>    | 5:135364583-135399507  | 1738.58 | 1333.85 | -0.382312 | -1.92942 | 0.0016   | 0.025428  | yes |
| <i>LRIG2</i>    | 1:113615830-113667342  | 3.73615 | 2.86446 | -0.383291 | -1.97392 | 6.00E-04 | 0.0120833 | yes |
| <i>PHLDA1</i>   | 12:76419226-76425556   | 87.9436 | 67.4163 | -0.383482 | -2.42269 | 0.00065  | 0.0128896 | yes |
| <i>NEDD8</i>    | 14:24683142-24701576   | 400.24  | 306.739 | -0.383853 | -1.75042 | 0.00045  | 0.0095063 | yes |
| <i>SLC22A15</i> | 1:116519118-116612675  | 4.87337 | 3.73415 | -0.38414  | -2.04595 | 0.00095  | 0.0173333 | yes |
| <i>KRT14</i>    | 17:39738530-39743147   | 1769.37 | 1355.61 | -0.384296 | -1.83788 | 0.0015   | 0.0242609 | yes |
| <i>SPAG7</i>    | 17:4862520-4871132     | 65.8641 | 50.4473 | -0.384716 | -2.19691 | 8.00E-04 | 0.0151114 | yes |
| <i>BLVRB</i>    | 19:40953690-40971725   | 34.5342 | 26.4443 | -0.38507  | -2.22959 | 0.00125  | 0.0209598 | yes |
| <i>HTRA1</i>    | 10:124221040-124274424 | 33.1559 | 25.3711 | -0.386079 | -2.49346 | 0.00055  | 0.0112366 | yes |
| <i>ROBO3</i>    | 11:124735304-124751370 | 2.73579 | 2.09343 | -0.386089 | -1.83134 | 0.00075  | 0.0143591 | yes |
| <i>FCHSD1</i>   | 5:141016516-141030986  | 10.573  | 8.08646 | -0.386801 | -1.5464  | 0.0029   | 0.0399896 | yes |
| <i>RILPL1</i>   | 12:123955908-124018265 | 6.69914 | 5.12361 | -0.386815 | -1.94253 | 9.00E-04 | 0.0166758 | yes |
| <i>CEBPG</i>    | 19:33864574-33873592   | 27.1976 | 20.7818 | -0.388161 | -1.95599 | 0.00025  | 0.0059445 | yes |
| <i>UQCRB</i>    | 8:97238903-97247862    | 46.4379 | 35.4694 | -0.388728 | -2.03011 | 0.0012   | 0.0202526 | yes |
| <i>IL1B</i>     | 2:113587336-113594356  | 205.12  | 156.562 | -0.389729 | -2.43896 | 0.00035  | 0.0077304 | yes |
| <i>ARHGEF4</i>  | 2:131674223-131804836  | 6.02391 | 4.59785 | -0.389741 | -1.6191  | 0.00365  | 0.0471886 | yes |
| <i>FNBP4</i>    | 11:47738068-47788993   | 22.458  | 17.1413 | -0.38975  | -2.11798 | 0.00025  | 0.0059445 | yes |
| <i>PSMD2</i>    | 3:184017021-184026840  | 269.161 | 205.422 | -0.389878 | -1.92246 | 5.00E-04 | 0.0104629 | yes |
| <i>RRAS</i>     | 19:50138551-50143400   | 102.36  | 78.1143 | -0.389998 | -2.52976 | 0.00055  | 0.0112366 | yes |
| <i>CNTNAP1</i>  | 17:40834631-40852011   | 2.8409  | 2.16734 | -0.390423 | -1.89595 | 0.00045  | 0.0095063 | yes |
| <i>MTSS1</i>    | 8:125563024-125740730  | 44.996  | 34.3154 | -0.390939 | -2.22843 | 0.00035  | 0.0077304 | yes |
| <i>HIBADH</i>   | 7:27565058-27702620    | 44.8078 | 34.1304 | -0.392691 | -2.3499  | 3.00E-04 | 0.0068401 | yes |
| <i>TMEM234</i>  | 1:32681797-32687926    | 7.80412 | 5.94422 | -0.392748 | -1.75298 | 0.0039   | 0.0495948 | yes |
| <i>SAT1</i>     | X:23801274-23804327    | 162.359 | 123.508 | -0.394586 | -1.83908 | 0.0021   | 0.031143  | yes |
| <i>UHRF1BP1</i> | 6:34759793-34845291    | 1.94822 | 1.4813  | -0.395291 | -1.85157 | 0.00045  | 0.0095063 | yes |
| <i>FLII</i>     | 17:18128935-18162230   | 89.397  | 67.9704 | -0.395319 | -1.88549 | 0.001    | 0.0178882 | yes |
| <i>KDM1B</i>    | 6:18155618-18224084    | 21.7843 | 16.5615 | -0.395451 | -2.27323 | 0.00035  | 0.0077304 | yes |
| <i>RNASE7</i>   | 14:21510384-21512392   | 16.1497 | 12.2753 | -0.395751 | -2.19764 | 0.00055  | 0.0112366 | yes |
| <i>EZH1</i>     | 17:40852292-40897071   | 5.21442 | 3.96304 | -0.395901 | -1.86386 | 8.00E-04 | 0.0151114 | yes |

|                 |                       |         |         |           |          |          |           |     |
|-----------------|-----------------------|---------|---------|-----------|----------|----------|-----------|-----|
| <i>DAPP1</i>    | 4:100737980-100791347 | 13.3592 | 10.1524 | -0.396023 | -2.13577 | 7.00E-04 | 0.0135861 | yes |
| <i>ABAT</i>     | 16:8768443-8878432    | 2.80398 | 2.12804 | -0.397946 | -1.81877 | 0.00045  | 0.0095063 | yes |
| <i>NEK2</i>     | 1:211831597-211848972 | 18.8306 | 14.2874 | -0.398335 | -1.86192 | 0.00345  | 0.0452052 | yes |
| <i>RTKN</i>     | 2:74652987-74669060   | 41.027  | 31.0675 | -0.40117  | -1.99557 | 0.00035  | 0.0077304 | yes |
| <i>DHX38</i>    | 16:72118755-72146811  | 24.9179 | 18.8654 | -0.40144  | -1.81111 | 0.00075  | 0.0143591 | yes |
| <i>ATF4</i>     | 22:39916568-39918691  | 622.474 | 471.159 | -0.401799 | -1.79272 | 0.00025  | 0.0059445 | yes |
| <i>ARNT</i>     | 1:150782180-150849244 | 8.91702 | 6.74921 | -0.401843 | -1.57288 | 0.00345  | 0.0452052 | yes |
| <i>APOL6</i>    | 22:36044423-36064456  | 2.27712 | 1.72306 | -0.402235 | -2.11009 | 3.00E-04 | 0.0068401 | yes |
| <i>CCNL2</i>    | 1:1321090-1334718     | 28.4946 | 21.5336 | -0.404099 | -1.88768 | 9.00E-04 | 0.0166758 | yes |
| <i>DBN1</i>     | 5:176883613-176900694 | 157.63  | 119.067 | -0.404764 | -2.10317 | 1.00E-04 | 0.0027579 | yes |
| <i>IL10RB</i>   | 21:34638664-34669539  | 7.67939 | 5.79813 | -0.405403 | -2.20984 | 4.00E-04 | 0.0086622 | yes |
| <i>PLEKHA5</i>  | 12:19282625-19529334  | 17.923  | 13.5299 | -0.405667 | -2.26876 | 6.00E-04 | 0.0120833 | yes |
| <i>MPP7</i>     | 10:28339921-28571067  | 4.87277 | 3.67815 | -0.40576  | -2.24907 | 5.00E-04 | 0.0104629 | yes |
| <i>TTL11</i>    | 9:124584203-124855885 | 4.62289 | 3.48875 | -0.406084 | -1.8522  | 0.0015   | 0.0242609 | yes |
| <i>ADAMTSL4</i> | 1:150521897-150533413 | 2.23346 | 1.68539 | -0.406202 | -1.63557 | 0.0032   | 0.0433186 | yes |
| <i>HIPK2</i>    | 7:139246315-139342363 | 7.44719 | 5.61873 | -0.406452 | -1.71083 | 0.0017   | 0.0266895 | yes |
| <i>ARHGAP40</i> | 20:37230576-37279295  | 14.3002 | 10.7886 | -0.406531 | -1.97873 | 4.00E-04 | 0.0086622 | yes |
| <i>CTSL1</i>    | 9:90340973-90346384   | 52.8629 | 39.854  | -0.407531 | -1.9107  | 3.00E-04 | 0.0068401 | yes |
| <i>DNMT3A</i>   | 2:25455829-25565459   | 2.03487 | 1.53397 | -0.407662 | -1.62341 | 0.0027   | 0.0378707 | yes |
| <i>NDUFS5</i>   | 1:39491966-39500308   | 583.564 | 439.778 | -0.408118 | -2.35632 | 0.00045  | 0.0095063 | yes |
| <i>CACTIN</i>   | 19:3607244-3626813    | 14.5273 | 10.9468 | -0.408251 | -1.95636 | 0.00075  | 0.0143591 | yes |
| <i>CD9</i>      | 12:6309481-6347437    | 248.897 | 187.537 | -0.408373 | -2.42257 | 0.00015  | 0.0038882 | yes |
| <i>KATNA1</i>   | 6:149916008-149969940 | 14.825  | 11.1569 | -0.410102 | -2.0566  | 0.00095  | 0.0173333 | yes |
| <i>ASAP3</i>    | 1:23755055-23810750   | 3.22076 | 2.42327 | -0.410445 | -1.79491 | 0.0016   | 0.025428  | yes |
| <i>SART1</i>    | 11:65729159-65747607  | 32.5377 | 24.4559 | -0.411931 | -2.21468 | 1.00E-04 | 0.0027579 | yes |
| <i>GARS</i>     | 7:30634180-30673649   | 223.018 | 167.519 | -0.412837 | -2.42642 | 0.00015  | 0.0038882 | yes |
| <i>NBPF9</i>    | 1:144811742-144828810 | 3.72873 | 2.79955 | -0.41349  | -1.81234 | 0.00315  | 0.0429412 | yes |
| <i>PLK1</i>     | 16:23690200-23724821  | 58.8468 | 44.1772 | -0.413662 | -2.39844 | 3.00E-04 | 0.0068401 | yes |
| <i>UPP1</i>     | 7:48128354-48148330   | 151.739 | 113.904 | -0.413771 | -2.23559 | 2.00E-04 | 0.004937  | yes |
| <i>ARHGAP31</i> | 3:119013219-119138323 | 1.06943 | 0.80245 | -0.414364 | -1.82224 | 0.002    | 0.0300911 | yes |
| <i>TSG101</i>   | 11:18501857-18548503  | 50.5083 | 37.8874 | -0.414803 | -2.37444 | 0.00035  | 0.0077304 | yes |
| <i>CTTNBP2</i>  | 7:117350704-117513561 | 1.83703 | 1.37731 | -0.415519 | -2.08342 | 0.0015   | 0.0242609 | yes |
| <i>CPT1A</i>    | 11:68522087-68609399  | 3.62868 | 2.71956 | -0.416076 | -1.82956 | 0.0015   | 0.0242609 | yes |
| <i>FUCA2</i>    | 6:143815948-143833020 | 16.0762 | 12.0437 | -0.416649 | -2.29724 | 0.00035  | 0.0077304 | yes |



|                 |                        |         |         |           |          |          |           |     |
|-----------------|------------------------|---------|---------|-----------|----------|----------|-----------|-----|
| <i>IL1R1</i>    | 2:102770401-102796334  | 1.77117 | 1.3259  | -0.41773  | -1.87504 | 0.0016   | 0.025428  | yes |
| <i>MAB21L3</i>  | 1:116654375-116677861  | 2.93608 | 2.19763 | -0.417943 | -1.94434 | 0.00115  | 0.0196005 | yes |
| <i>LMO4</i>     | 1:87794150-87814606    | 6.27429 | 4.6947  | -0.41842  | -2.36609 | 5.00E-04 | 0.0104629 | yes |
| <i>NGFRAP1</i>  | X:102631267-102633001  | 101.115 | 75.634  | -0.418885 | -1.72004 | 0.0018   | 0.0279207 | yes |
| <i>FAM174A</i>  | 5:99871123-99922440    | 10.7521 | 8.04164 | -0.419059 | -2.39027 | 8.00E-04 | 0.0151114 | yes |
| <i>LPAR5</i>    | 12:6728000-6745297     | 9.8781  | 7.38771 | -0.419106 | -2.01722 | 0.00035  | 0.0077304 | yes |
| <i>ETFB</i>     | 19:51848408-51869672   | 57.3514 | 42.869  | -0.419894 | -1.88257 | 0.00035  | 0.0077304 | yes |
| <i>EIF3G</i>    | 19:10216898-10230599   | 229.062 | 171.169 | -0.420317 | -1.94954 | 9.00E-04 | 0.0166758 | yes |
| <i>CEP192</i>   | 18:12991360-13125052   | 10.8714 | 8.12366 | -0.420336 | -2.30558 | 5.00E-05 | 0.0014988 | yes |
| <i>LAMB2</i>    | 3:49158546-49170599    | 16.7846 | 12.5352 | -0.421151 | -2.0745  | 2.00E-04 | 0.004937  | yes |
| <i>CLIP4</i>    | 2:29338307-29406679    | 9.89828 | 7.39189 | -0.421234 | -2.41435 | 3.00E-04 | 0.0068401 | yes |
| <i>CAPG</i>     | 2:85621870-85641197    | 96.7707 | 72.1621 | -0.423329 | -2.01506 | 1.00E-04 | 0.0027579 | yes |
| <i>TCEAL4</i>   | X:102840418-102842657  | 76.7694 | 57.1819 | -0.424975 | -1.89485 | 5.00E-05 | 0.0014988 | yes |
| <i>RPL36AL</i>  | 14:50085405-50087349   | 602.303 | 448.265 | -0.426136 | -3.59362 | 2.00E-04 | 0.004937  | yes |
| <i>CIRBP</i>    | 19:1267469-1274809     | 71.6753 | 53.3044 | -0.42722  | -1.7612  | 4.00E-04 | 0.0086622 | yes |
| <i>LARP6</i>    | 15:71123888-71146498   | 8.19186 | 6.08861 | -0.428077 | -1.77635 | 0.0014   | 0.0230273 | yes |
| <i>HNRPDL</i>   | 4:83343716-83351378    | 97.1529 | 72.1564 | -0.42913  | -2.00441 | 0.00045  | 0.0095063 | yes |
| <i>EIF2C4</i>   | 1:36273827-36323491    | 2.57357 | 1.91109 | -0.429374 | -2.06137 | 0.00015  | 0.0038882 | yes |
| <i>KLF9</i>     | 9:72999512-73029573    | 7.8279  | 5.80699 | -0.430835 | -2.41643 | 2.00E-04 | 0.004937  | yes |
| <i>IRX4</i>     | 5:1877540-1882880      | 16.5925 | 12.3069 | -0.431063 | -2.95446 | 0.00055  | 0.0112366 | yes |
| <i>FAM84B</i>   | 8:127564682-127570711  | 10.5754 | 7.83982 | -0.431818 | -2.43011 | 5.00E-05 | 0.0014988 | yes |
| <i>MIR205HG</i> | 1:209602167-209605894  | 228.813 | 169.565 | -0.432331 | -3.03212 | 5.00E-05 | 0.0014988 | yes |
| <i>COL7A1</i>   | 3:48601505-48632593    | 134.321 | 99.438  | -0.433817 | -1.95748 | 1.00E-04 | 0.0027579 | yes |
| <i>FBXO10</i>   | 9:37510888-37576250    | 2.14332 | 1.58617 | -0.434295 | -1.90331 | 0.00045  | 0.0095063 | yes |
| <i>ARHGEF37</i> | 5:148961134-149014527  | 1.52469 | 1.12798 | -0.434779 | -1.69896 | 0.00135  | 0.0222521 | yes |
| <i>GOLGA2</i>   | 9:131018107-131038268  | 23.8733 | 17.6616 | -0.434788 | -2.26539 | 5.00E-05 | 0.0014988 | yes |
| <i>NDUFA1</i>   | X:119004494-119010629  | 259.198 | 191.641 | -0.435649 | -1.96855 | 0.00045  | 0.0095063 | yes |
| <i>MAML2</i>    | 11:95711439-96076344   | 3.71268 | 2.74471 | -0.435804 | -2.24671 | 0.00015  | 0.0038882 | yes |
| <i>SHFM1</i>    | 7:96318078-96339203    | 368.571 | 272.443 | -0.435991 | -3.57588 | 5.00E-05 | 0.0014988 | yes |
| <i>MAP1B</i>    | 5:71403117-71505397    | 7.17213 | 5.297   | -0.437226 | -2.38623 | 5.00E-05 | 0.0014988 | yes |
| <i>CASP4</i>    | 11:104813593-104839325 | 49.2724 | 36.3822 | -0.437545 | -1.80524 | 0.0011   | 0.0190409 | yes |
| <i>POLG2</i>    | 17:62473901-62493184   | 5.94221 | 4.38692 | -0.437792 | -2.05559 | 0.00085  | 0.0159588 | yes |
| <i>FOXJ3</i>    | 1:42642209-42801548    | 13.3971 | 9.89029 | -0.43784  | -1.72101 | 0.0024   | 0.0346006 | yes |
| <i>IP6K2</i>    | 3:48725435-48754711    | 26.2294 | 19.3606 | -0.438056 | -1.63703 | 0.0034   | 0.0448528 | yes |

|                  |                        |         |          |           |          |          |           |     |
|------------------|------------------------|---------|----------|-----------|----------|----------|-----------|-----|
| <i>STC2</i>      | 5:172741725-172756506  | 68.785  | 50.7221  | -0.439481 | -2.29444 | 5.00E-05 | 0.0014988 | yes |
| <i>CDC37</i>     | 19:10501808-10514271   | 278.959 | 205.491  | -0.440981 | -2.28871 | 5.00E-05 | 0.0014988 | yes |
| <i>TUBB3</i>     | 16:89988416-90002505   | 38.9435 | 28.6869  | -0.440988 | -2.29567 | 3.00E-04 | 0.0068401 | yes |
| <i>TAF1D</i>     | 11:93469094-93474703   | 63.9934 | 47.1249  | -0.441435 | -2.63658 | 1.00E-04 | 0.0027579 | yes |
| <i>CLMP</i>      | 11:122943019-123066007 | 28.3816 | 20.8771  | -0.443035 | -2.47503 | 5.00E-05 | 0.0014988 | yes |
| <i>GMIP</i>      | 19:19740284-19754455   | 6.01231 | 4.42081  | -0.443609 | -2.36874 | 0.00015  | 0.0038882 | yes |
| <i>C6orf141</i>  | 6:49518112-49519808    | 5.37744 | 3.95045  | -0.444903 | -2.14775 | 0.0011   | 0.0190409 | yes |
| <i>CCDC12</i>    | 3:46963219-47018270    | 49.1445 | 36.0917  | -0.445363 | -2.58549 | 2.00E-04 | 0.004937  | yes |
| <i>SEMA5A</i>    | 5:9035137-9546233      | 1.24874 | 0.916958 | -0.445543 | -2.24104 | 0.00015  | 0.0038882 | yes |
| <i>DHRS7</i>     | 14:60611495-60632211   | 55.7885 | 40.937   | -0.446562 | -2.62849 | 1.00E-04 | 0.0027579 | yes |
| <i>ZNF841</i>    | 19:52567718-52599018   | 4.14731 | 3.04249  | -0.446921 | -2.30635 | 0.00015  | 0.0038882 | yes |
| <i>ULK1</i>      | 12:132379278-132407707 | 8.26689 | 6.06295  | -0.447326 | -2.425   | 0.00025  | 0.0059445 | yes |
| <i>ATG16L2</i>   | 11:72525450-72540680   | 5.53401 | 4.05695  | -0.447931 | -2.1922  | 0.00045  | 0.0095063 | yes |
| <i>COX19</i>     | 7:1004485-1015235      | 5.71442 | 4.1861   | -0.448999 | -2.18746 | 2.00E-04 | 0.004937  | yes |
| <i>CCNL1</i>     | 3:156865584-156878482  | 29.0705 | 21.2896  | -0.449408 | -2.58865 | 5.00E-05 | 0.0014988 | yes |
| <i>PBXIP1</i>    | 1:154916555-154928567  | 5.71752 | 4.1865   | -0.449643 | -2.0009  | 0.00015  | 0.0038882 | yes |
| <i>H1FX</i>      | 3:129033613-129043412  | 98.8402 | 72.3472  | -0.450162 | -3.66862 | 5.00E-05 | 0.0014988 | yes |
| <i>PCDHGC3</i>   | 5:140710251-140892548  | 14.7409 | 10.7894  | -0.450217 | -1.81267 | 0.00065  | 0.0128896 | yes |
| <i>MAN2C1</i>    | 15:75648132-75660968   | 6.96286 | 5.08606  | -0.453132 | -1.73106 | 0.0017   | 0.0266895 | yes |
| <i>CDKN2B</i>    | 9:21994789-22121096    | 8.86319 | 6.45622  | -0.457135 | -1.85586 | 0.00095  | 0.0173333 | yes |
| <i>ZNF783</i>    | 7:148959261-148982085  | 3.19016 | 2.3222   | -0.458137 | -2.18174 | 1.00E-04 | 0.0027579 | yes |
| <i>PLEKHA6</i>   | 1:204187978-204329057  | 1.98737 | 1.44661  | -0.458187 | -2.1523  | 0.00015  | 0.0038882 | yes |
| <i>CLASRP</i>    | 19:45542297-45574214   | 25.174  | 18.3114  | -0.45919  | -2.71484 | 5.00E-05 | 0.0014988 | yes |
| <i>AOX1</i>      | 2:201450730-201536218  | 48.272  | 35.1104  | -0.459287 | -2.4465  | 5.00E-05 | 0.0014988 | yes |
| <i>HIST1H2BK</i> | 6:27106071-27114637    | 24.3336 | 17.6805  | -0.460786 | -2.76649 | 5.00E-05 | 0.0014988 | yes |
| <i>XYLT1</i>     | 16:17196180-17564738   | 3.48481 | 2.53174  | -0.460947 | -2.22767 | 2.00E-04 | 0.004937  | yes |
| <i>GLTSCR2</i>   | 19:48248792-48260323   | 116.218 | 84.4029  | -0.461466 | -2.80943 | 5.00E-05 | 0.0014988 | yes |
| <i>PPP1R15A</i>  | 19:49375648-49379319   | 68.8693 | 50.0098  | -0.461649 | -2.39336 | 5.00E-05 | 0.0014988 | yes |
| <i>PLAT</i>      | 8:42032235-42065194    | 10.4219 | 7.56435  | -0.462327 | -2.24376 | 0.00015  | 0.0038882 | yes |
| <i>HKR1</i>      | 19:37825579-37855357   | 8.04015 | 5.83284  | -0.463024 | -2.13118 | 0.00025  | 0.0059445 | yes |
| <i>IL20RB</i>    | 3:136676706-136729927  | 107.777 | 78.1726  | -0.463321 | -2.41973 | 5.00E-05 | 0.0014988 | yes |
| <i>PRSS3</i>     | 9:33750463-33799229    | 64.7909 | 46.9663  | -0.464167 | -2.00047 | 5.00E-05 | 0.0014988 | yes |
| <i>MTMR11</i>    | 1:149900542-149908791  | 4.32557 | 3.1355   | -0.464193 | -1.74476 | 0.0018   | 0.0279207 | yes |
| <i>DUSP18</i>    | 22:31058038-31063872   | 2.83806 | 2.05709  | -0.464298 | -2.05195 | 0.00165  | 0.0260097 | yes |

|                 |                        |         |          |           |          |          |           |     |
|-----------------|------------------------|---------|----------|-----------|----------|----------|-----------|-----|
| <i>HIPK2</i>    | 7:139415729-139477693  | 13.0353 | 9.44792  | -0.464358 | -2.91858 | 5.00E-05 | 0.0014988 | yes |
| <i>SDHA</i>     | 5:218355-256815        | 73.745  | 53.4289  | -0.464924 | -2.51933 | 5.00E-05 | 0.0014988 | yes |
| <i>KDM6B</i>    | 17:7743234-7758118     | 7.12108 | 5.1589   | -0.465033 | -2.50817 | 5.00E-05 | 0.0014988 | yes |
| <i>ZFAND2A</i>  | 7:1192542-1199855      | 10.3487 | 7.49535  | -0.46538  | -2.38704 | 0.00055  | 0.0112366 | yes |
| <i>HSD11B1</i>  | 1:209859524-209908295  | 11.1762 | 8.09347  | -0.465597 | -2.20304 | 0.00025  | 0.0059445 | yes |
| <i>RABGGTB</i>  | 1:76251885-76260764    | 93.0568 | 67.3646  | -0.466121 | -2.88495 | 5.00E-05 | 0.0014988 | yes |
| <i>ANXA3</i>    | 4:79472741-79531605    | 306.622 | 221.86   | -0.466814 | -2.79155 | 5.00E-05 | 0.0014988 | yes |
| <i>CHD2</i>     | 15:93443550-93571237   | 21.0174 | 15.1775  | -0.469652 | -2.26402 | 5.00E-05 | 0.0014988 | yes |
| <i>PER3</i>     | 1:7844762-7905237      | 1.31105 | 0.946104 | -0.470657 | -2.1219  | 0.00095  | 0.0173333 | yes |
| <i>PTPN2</i>    | 18:12785476-12884334   | 90.1345 | 65.0312  | -0.470946 | -2.32336 | 4.00E-04 | 0.0086622 | yes |
| <i>DYNLT3</i>   | X:37698088-37706889    | 28.6289 | 20.6512  | -0.471247 | -3.10417 | 5.00E-05 | 0.0014988 | yes |
| <i>ANKRD36</i>  | 2:97779232-97930258    | 1.21491 | 0.875483 | -0.472697 | -2.13304 | 9.00E-04 | 0.0166758 | yes |
| <i>SARS</i>     | 1:109756514-109780804  | 148.005 | 106.639  | -0.472909 | -2.06973 | 0.00015  | 0.0038882 | yes |
| <i>NUMBL</i>    | 19:41171809-41196556   | 9.3187  | 6.71228  | -0.473326 | -2.42347 | 1.00E-04 | 0.0027579 | yes |
| <i>JDP2</i>     | 14:75894508-75939404   | 8.70534 | 6.26307  | -0.475032 | -2.0825  | 5.00E-05 | 0.0014988 | yes |
| <i>LRRFIP1</i>  | 2:238536223-238690290  | 96.5748 | 69.4369  | -0.475945 | -2.27702 | 5.00E-05 | 0.0014988 | yes |
| <i>HMG20B</i>   | 19:3572942-3579081     | 78.5514 | 56.471   | -0.476127 | -3.18848 | 5.00E-05 | 0.0014988 | yes |
| <i>MRPS21</i>   | 1:150266268-150280819  | 259.68  | 186.641  | -0.476467 | -2.32452 | 5.00E-05 | 0.0014988 | yes |
| <i>NCOA7</i>    | 6:126102306-126253176  | 6.52666 | 4.68969  | -0.47685  | -2.23859 | 5.00E-05 | 0.0014988 | yes |
| <i>ZBTB17</i>   | 1:16268363-16302627    | 11.6356 | 8.35231  | -0.478303 | -2.07969 | 5.00E-05 | 0.0014988 | yes |
| <i>TNFRSF19</i> | 13:24144508-24250244   | 8.84056 | 6.34577  | -0.478342 | -2.36089 | 5.00E-05 | 0.0014988 | yes |
| <i>NCOR2</i>    | 12:124808956-125052010 | 28.5841 | 20.5066  | -0.47913  | -1.798   | 0.0031   | 0.0423712 | yes |
| <i>SRSF5</i>    | 14:70232999-70238722   | 134.117 | 96.0465  | -0.481691 | -2.33708 | 5.00E-05 | 0.0014988 | yes |
| <i>YPEL5</i>    | 2:30369749-30383399    | 30.4803 | 21.8172  | -0.482413 | -2.80391 | 5.00E-05 | 0.0014988 | yes |
| <i>PRNP</i>     | 20:4666796-4682234     | 352.142 | 251.84   | -0.483649 | -2.30331 | 5.00E-05 | 0.0014988 | yes |
| <i>C9orf85</i>  | 9:74526422-74588373    | 9.6341  | 6.88879  | -0.483899 | -2.72347 | 0.00015  | 0.0038882 | yes |
| <i>THOC1</i>    | 18:214519-268059       | 36.8984 | 26.3831  | -0.483945 | -3.0472  | 5.00E-05 | 0.0014988 | yes |
| <i>ELMO3</i>    | 16:67233027-67237927   | 10.4147 | 7.44599  | -0.484085 | -2.28202 | 5.00E-05 | 0.0014988 | yes |
| <i>ADPRM</i>    | 17:10600926-10614875   | 3.72072 | 2.65897  | -0.484716 | -2.01685 | 0.00235  | 0.0339427 | yes |
| <i>TPMT</i>     | 6:18128541-18155374    | 26.5157 | 18.922   | -0.486781 | -2.81887 | 5.00E-05 | 0.0014988 | yes |
| <i>IQGAP3</i>   | 1:156495196-156542396  | 10.1644 | 7.25066  | -0.487346 | -2.46952 | 5.00E-05 | 0.0014988 | yes |
| <i>MGEA5</i>    | 10:103544199-103578222 | 53.4447 | 38.1179  | -0.487579 | -2.4271  | 5.00E-05 | 0.0014988 | yes |
| <i>FAM177A1</i> | 14:35514112-35552589   | 19.8813 | 14.1769  | -0.48787  | -2.44496 | 1.00E-04 | 0.0027579 | yes |
| <i>SPRYD3</i>   | 12:53436972-53473204   | 19.9597 | 14.2099  | -0.490189 | -1.91687 | 2.00E-04 | 0.004937  | yes |

|                     |                        |         |          |           |          |          |           |     |
|---------------------|------------------------|---------|----------|-----------|----------|----------|-----------|-----|
| <i>ZNF251</i>       | 8:145946293-145980970  | 3.96941 | 2.8252   | -0.490571 | -2.49294 | 5.00E-05 | 0.0014988 | yes |
| <i>PYGB</i>         | 20:25228705-25371618   | 106.975 | 76.1244  | -0.49085  | -2.35833 | 5.00E-05 | 0.0014988 | yes |
| <i>OGT</i>          | X:70752911-70795747    | 26.1251 | 18.5863  | -0.491195 | -2.36941 | 5.00E-05 | 0.0014988 | yes |
| <i>GADD45B</i>      | 19:2476122-2478257     | 51.5894 | 36.635   | -0.49385  | -2.73896 | 5.00E-05 | 0.0014988 | yes |
| <i>CD55</i>         | 1:207494816-207534311  | 10.7247 | 7.6118   | -0.494626 | -2.06221 | 6.00E-04 | 0.0120833 | yes |
| <i>TNFAIP8L1</i>    | 19:4639526-4655580     | 3.94923 | 2.79766  | -0.497351 | -2.22928 | 5.00E-05 | 0.0014988 | yes |
| <i>PDCD6</i>        | 5:271735-438406        | 125.385 | 88.7715  | -0.49819  | -2.71832 | 0.00015  | 0.0038882 | yes |
| <i>DUSP16</i>       | 12:12626215-12715448   | 2.83092 | 2.00107  | -0.500502 | -2.46442 | 5.00E-05 | 0.0014988 | yes |
| <i>CCDC9</i>        | 19:47759730-47775210   | 11.5462 | 8.15766  | -0.501194 | -2.50276 | 1.00E-04 | 0.0027579 | yes |
| <i>PTGS2</i>        | 1:186640943-186649559  | 46.3585 | 32.7347  | -0.50201  | -3.09363 | 5.00E-05 | 0.0014988 | yes |
| <i>C1RL</i>         | 12:7247145-7274447     | 4.03119 | 2.84532  | -0.502616 | -1.5451  | 0.00375  | 0.0481607 | yes |
| <i>MATN3</i>        | 2:20191812-20212455    | 7.50242 | 5.28148  | -0.506413 | -2.85188 | 5.00E-05 | 0.0014988 | yes |
| <i>EIF4E2</i>       | 2:233415356-233433920  | 111.756 | 78.6548  | -0.506743 | -3.0058  | 5.00E-05 | 0.0014988 | yes |
| <i>STX4</i>         | 16:31044902-31051485   | 31.9176 | 22.4305  | -0.508889 | -2.55713 | 5.00E-05 | 0.0014988 | yes |
| <i>AADAC</i>        | 3:151531860-151546276  | 7.67039 | 5.38064  | -0.511522 | -2.6906  | 5.00E-05 | 0.0014988 | yes |
| <i>ZSWIM4</i>       | 19:13906273-13943044   | 2.74999 | 1.92808  | -0.512262 | -2.41303 | 5.00E-05 | 0.0014988 | yes |
| <i>CEP170</i>       | 1:243287729-243418708  | 24.7975 | 17.3693  | -0.51366  | -1.90967 | 0.00185  | 0.0285536 | yes |
| <i>FGGY</i>         | 1:59762624-60228402    | 3.8678  | 2.7087   | -0.513914 | -1.62145 | 0.0018   | 0.0279207 | yes |
| <i>DCP1B</i>        | 12:2055213-2113677     | 3.8169  | 2.67229  | -0.514324 | -2.35107 | 2.00E-04 | 0.004937  | yes |
| <i>DPP8</i>         | 15:65737997-65810035   | 7.85752 | 5.50115  | -0.51434  | -1.94305 | 0.0015   | 0.0242609 | yes |
| <i>LAMB3</i>        | 1:209788214-209825820  | 754.904 | 477.723  | -0.517386 | -3.19671 | 5.00E-05 | 0.0014988 | yes |
| <i>TAX1BP1</i>      | 7:27778991-27869386    | 43.5108 | 30.3947  | -0.517557 | -2.30691 | 1.00E-04 | 0.0027579 | yes |
| <i>BARX2</i>        | 11:129245880-129322174 | 10.0927 | 7.04891  | -0.517844 | -2.61742 | 5.00E-05 | 0.0014988 | yes |
| <i>FBXO2</i>        | 1:11708417-11723384    | 33.1278 | 23.1175  | -0.519055 | -2.3973  | 2.00E-04 | 0.004937  | yes |
| <i>AARS</i>         | 16:70286296-70323412   | 94.5506 | 65.9467  | -0.519786 | -2.67032 | 5.00E-05 | 0.0014988 | yes |
| <i>LIPE</i>         | 19:42901299-43156507   | 5.14127 | 3.56842  | -0.526838 | -2.20905 | 6.00E-04 | 0.0120833 | yes |
| <i>GPR110</i>       | 6:46967812-47010082    | 2.40256 | 1.66667  | -0.527607 | -1.81365 | 0.00115  | 0.0196005 | yes |
| <i>TUBA1A</i>       | 12:49578577-49583107   | 68.6697 | 47.631   | -0.527771 | -2.51147 | 5.00E-05 | 0.0014988 | yes |
| <i>DGKA</i>         | 12:56324945-56347807   | 58.8208 | 40.793   | -0.528005 | -2.62169 | 5.00E-05 | 0.0014988 | yes |
| <i>CACNG8</i>       | 19:54466289-54493469   | 1.23329 | 0.854791 | -0.528864 | -2.15816 | 5.00E-05 | 0.0014988 | yes |
| <i>LOC100862671</i> | 16:30751511-30756517   | 7.69659 | 5.32985  | -0.530124 | -2.89815 | 5.00E-05 | 0.0014988 | yes |
| <i>COL1A1</i>       | 17:48261456-48279000   | 3.39298 | 2.34672  | -0.53191  | -2.69611 | 5.00E-05 | 0.0014988 | yes |
| <i>EMP1</i>         | 12:13349601-13369708   | 25.8709 | 17.888   | -0.532335 | -2.69028 | 5.00E-05 | 0.0014988 | yes |
| <i>TMC7</i>         | 16:18995255-19075264   | 3.44495 | 2.37546  | -0.536273 | -2.13915 | 0.001    | 0.0178882 | yes |

|                  |                        |         |          |           |          |          |           |     |
|------------------|------------------------|---------|----------|-----------|----------|----------|-----------|-----|
| <i>UBXN1</i>     | 11:62443971-62446527   | 82.9125 | 57.1642  | -0.536479 | -3.04966 | 5.00E-05 | 0.0014988 | yes |
| <i>XDH</i>       | 2:31557187-31637611    | 3.78943 | 2.61239  | -0.536608 | -2.5531  | 5.00E-05 | 0.0014988 | yes |
| <i>VPS28</i>     | 8:145648999-145653927  | 32.3371 | 22.279   | -0.537503 | -1.76628 | 0.00195  | 0.029568  | yes |
| <i>LPIN2</i>     | 18:2916991-3011945     | 3.11514 | 2.14413  | -0.538903 | -2.55711 | 5.00E-05 | 0.0014988 | yes |
| <i>UGT8</i>      | 4:115519610-115598202  | 2.18595 | 1.50442  | -0.539046 | -2.09009 | 0.00055  | 0.0112366 | yes |
| <i>ICAM1</i>     | 19:10381516-10397291   | 2.12226 | 1.45982  | -0.539809 | -2.20222 | 3.00E-04 | 0.0068401 | yes |
| <i>FAM50A</i>    | X:153672472-153679002  | 90.8134 | 62.3747  | -0.541944 | -3.25892 | 5.00E-05 | 0.0014988 | yes |
| <i>NFKB2</i>     | 10:104153866-104162286 | 16.4833 | 11.3193  | -0.542221 | -2.40677 | 1.00E-04 | 0.0027579 | yes |
| <i>NRBP2</i>     | 8:144915754-144923146  | 10.1097 | 6.93925  | -0.542895 | -2.66568 | 5.00E-05 | 0.0014988 | yes |
| <i>LYPD3</i>     | 19:43964945-43969831   | 6.26788 | 4.29924  | -0.543897 | -2.6739  | 1.00E-04 | 0.0027579 | yes |
| <i>RELB</i>      | 19:45504706-45541456   | 7.80114 | 5.32497  | -0.550911 | -3.0299  | 5.00E-05 | 0.0014988 | yes |
| <i>GCNT2</i>     | 6:10521567-10629601    | 2.77201 | 1.89069  | -0.552015 | -2.60668 | 5.00E-05 | 0.0014988 | yes |
| <i>SLMO1</i>     | 18:12407894-12432237   | 10.3999 | 7.08801  | -0.553118 | -2.69555 | 5.00E-05 | 0.0014988 | yes |
| <i>SLC25A25</i>  | 9:130830478-130871537  | 3.31479 | 2.25562  | -0.555393 | -1.70348 | 0.00095  | 0.0173333 | yes |
| <i>PJA1</i>      | X:68380580-68385365    | 20.4294 | 13.8973  | -0.555847 | -2.33044 | 1.00E-04 | 0.0027579 | yes |
| <i>TUBE1</i>     | 6:112391859-112423993  | 11.9893 | 8.15557  | -0.555894 | -2.84082 | 5.00E-05 | 0.0014988 | yes |
| <i>IRAK2</i>     | 3:10206562-10285427    | 1.77229 | 1.20501  | -0.556577 | -2.16541 | 2.00E-04 | 0.004937  | yes |
| <i>CHMP1B</i>    | 18:11689013-11908796   | 86.1439 | 58.4732  | -0.558974 | -3.08905 | 5.00E-05 | 0.0014988 | yes |
| <i>FAM72B</i>    | 1:120839004-120855681  | 2.81912 | 1.912    | -0.56016  | -2.52792 | 3.00E-04 | 0.0068401 | yes |
| <i>MVP</i>       | 16:29827527-29859360   | 44.4814 | 30.1231  | -0.562331 | -2.07963 | 5.00E-05 | 0.0014988 | yes |
| <i>SUSD4</i>     | 1:223394160-223537544  | 1.09362 | 0.740248 | -0.563029 | -1.67892 | 0.00295  | 0.040643  | yes |
| <i>RGS3</i>      | 9:116207010-116360018  | 5.65983 | 3.82171  | -0.56654  | -1.64179 | 0.0019   | 0.0290653 | yes |
| <i>ATF3</i>      | 1:212738675-212794119  | 10.0871 | 6.81024  | -0.566727 | -1.6535  | 0.0036   | 0.0466199 | yes |
| <i>AKAP8L</i>    | 19:15490858-15529833   | 40.5586 | 27.3751  | -0.567146 | -3.14415 | 5.00E-05 | 0.0014988 | yes |
| <i>SORL1</i>     | 11:121322911-121504471 | 17.9852 | 12.1242  | -0.568925 | -2.99251 | 5.00E-05 | 0.0014988 | yes |
| <i>RPL41</i>     | 12:56510373-56511616   | 165.965 | 111.714  | -0.571067 | -2.63735 | 5.00E-05 | 0.0014988 | yes |
| <i>EVI5L</i>     | 19:7895160-7929862     | 6.07295 | 4.08652  | -0.571524 | -2.21834 | 3.00E-04 | 0.0068401 | yes |
| <i>FNDC4</i>     | 2:27714749-27718126    | 5.70133 | 3.83103  | -0.573566 | -2.55543 | 5.00E-05 | 0.0014988 | yes |
| <i>IGSF3</i>     | 1:117117030-117210314  | 14.4871 | 9.72501  | -0.574998 | -1.78384 | 0.0022   | 0.0322563 | yes |
| <i>C20orf197</i> | 20:58630979-58648008   | 8.65806 | 5.8096   | -0.575603 | -3.14915 | 5.00E-05 | 0.0014988 | yes |
| <i>CCNG2</i>     | 4:78078356-78091213    | 19.7914 | 13.2787  | -0.575759 | -3.20427 | 5.00E-05 | 0.0014988 | yes |
| <i>ANKRD36B</i>  | 2:98121260-98206428    | 1.08031 | 0.724789 | -0.575809 | -2.4234  | 3.00E-04 | 0.0068401 | yes |
| <i>IL1RL1</i>    | 2:102927961-102968497  | 31.4048 | 21.0639  | -0.576213 | -3.14922 | 5.00E-05 | 0.0014988 | yes |
| <i>HTATIP2</i>   | 11:20385230-20405329   | 33.2699 | 22.2848  | -0.578161 | -2.49134 | 5.00E-05 | 0.0014988 | yes |

|                 |                        |          |          |           |          |          |           |     |
|-----------------|------------------------|----------|----------|-----------|----------|----------|-----------|-----|
| <i>PIF1</i>     | 15:65107830-65117838   | 5.00068  | 3.34861  | -0.578561 | -2.87457 | 5.00E-05 | 0.0014988 | yes |
| <i>MAFF</i>     | 22:38597938-38612518   | 28.8778  | 19.3128  | -0.580407 | -2.53975 | 5.00E-05 | 0.0014988 | yes |
| <i>USP14</i>    | 18:158482-213739       | 49.7561  | 33.2421  | -0.58186  | -3.09456 | 5.00E-05 | 0.0014988 | yes |
| <i>PCBP4</i>    | 3:51989329-52001482    | 7.76309  | 5.18391  | -0.582591 | -2.15601 | 5.00E-05 | 0.0014988 | yes |
| <i>NRIP3</i>    | 11:9002122-9025596     | 0.885322 | 0.591062 | -0.582894 | -1.86643 | 0.00375  | 0.0481607 | yes |
| <i>C4orf32</i>  | 4:113066552-113110237  | 15.0905  | 10.0629  | -0.58459  | -4.15161 | 5.00E-05 | 0.0014988 | yes |
| <i>FAM125B</i>  | 9:129089122-129269320  | 0.972783 | 0.648583 | -0.584827 | -1.76216 | 0.00205  | 0.0305767 | yes |
| <i>PLAU</i>     | 10:75669726-75682535   | 86.7913  | 57.8145  | -0.586118 | -2.84286 | 5.00E-05 | 0.0014988 | yes |
| <i>KCNN4</i>    | 19:44270684-44285409   | 6.77252  | 4.50672  | -0.587615 | -3.05442 | 5.00E-05 | 0.0014988 | yes |
| <i>CDK5RAP2</i> | 9:123151146-123342437  | 9.03714  | 6.00109  | -0.590641 | -1.95579 | 0.00105  | 0.0185265 | yes |
| <i>PRDM1</i>    | 6:106534194-106557814  | 2.01963  | 1.33883  | -0.593118 | -2.57517 | 5.00E-05 | 0.0014988 | yes |
| <i>STX1A</i>    | 7:73113534-73134017    | 12.6966  | 8.40211  | -0.59562  | -2.42403 | 5.00E-05 | 0.0014988 | yes |
| <i>WDR45</i>    | X:48932091-48958059    | 8.64255  | 5.71637  | -0.596358 | -2.10851 | 0.00025  | 0.0059445 | yes |
| <i>FERMT1</i>   | 20:6055491-6104191     | 148.56   | 97.7706  | -0.603571 | -3.14021 | 5.00E-05 | 0.0014988 | yes |
| <i>ATP2B4</i>   | 1:203595914-203713209  | 17.397   | 11.4445  | -0.60418  | -2.92226 | 5.00E-05 | 0.0014988 | yes |
| <i>SLCO4A1</i>  | 20:61273796-61303647   | 5.75008  | 3.78024  | -0.605105 | -3.35314 | 5.00E-05 | 0.0014988 | yes |
| <i>IFI27L1</i>  | 14:94547638-94569060   | 5.78578  | 3.79947  | -0.606716 | -1.64616 | 0.0021   | 0.031143  | yes |
| <i>RNF41</i>    | 12:56596287-56615753   | 7.4466   | 4.88296  | -0.608824 | -2.1566  | 1.00E-04 | 0.0027579 | yes |
| <i>TIGD1</i>    | 2:233412778-233415283  | 1.77937  | 1.16668  | -0.608949 | -2.1105  | 0.001    | 0.0178882 | yes |
| <i>MAOA</i>     | X:43514154-43606071    | 9.05306  | 5.93434  | -0.609317 | -3.03999 | 5.00E-05 | 0.0014988 | yes |
| <i>AGPAT4</i>   | 6:161551056-161695107  | 1.54559  | 1.01262  | -0.610066 | -2.78033 | 5.00E-05 | 0.0014988 | yes |
| <i>NAGS</i>     | 17:42082031-42086436   | 4.15328  | 2.71624  | -0.612637 | -2.97608 | 5.00E-05 | 0.0014988 | yes |
| <i>TSLP</i>     | 5:110405777-110413722  | 4.19993  | 2.74611  | -0.612974 | -2.81075 | 1.00E-04 | 0.0027579 | yes |
| <i>ZBED2</i>    | 3:111260925-111371206  | 52.9762  | 34.6382  | -0.612983 | -2.97186 | 5.00E-05 | 0.0014988 | yes |
| <i>FAM196B</i>  | 5:169064250-169510386  | 3.2945   | 2.1527   | -0.613911 | -2.63317 | 5.00E-05 | 0.0014988 | yes |
| <i>ALDH2</i>    | 12:112204690-112247789 | 12.8036  | 8.35142  | -0.616453 | -2.07677 | 1.00E-04 | 0.0027579 | yes |
| <i>TLR6</i>     | 4:38825324-38858438    | 0.752047 | 0.490144 | -0.617617 | -2.20493 | 0.00065  | 0.0128896 | yes |
| <i>DDAH2</i>    | 6:31694816-31698039    | 14.5937  | 9.50397  | -0.618739 | -3.38552 | 5.00E-05 | 0.0014988 | yes |
| <i>C19orf68</i> | 19:48675209-48700516   | 3.06986  | 1.99906  | -0.61885  | -2.48273 | 0.00035  | 0.0077304 | yes |
| <i>SLIT3</i>    | 5:168093070-168728133  | 3.82966  | 2.49285  | -0.619421 | -3.32431 | 5.00E-05 | 0.0014988 | yes |
| <i>GTPBP2</i>   | 6:43543877-43596936    | 35.2196  | 22.8436  | -0.624588 | -2.69056 | 5.00E-05 | 0.0014988 | yes |
| <i>CXCR7</i>    | 2:237478379-237490997  | 2.99028  | 1.93798  | -0.625728 | -2.67004 | 1.00E-04 | 0.0027579 | yes |
| <i>METTL4</i>   | 18:2537523-2571489     | 8.89142  | 5.7442   | -0.630309 | -3.50305 | 5.00E-05 | 0.0014988 | yes |
| <i>MAPRE3</i>   | 2:27193524-27250087    | 3.58189  | 2.30997  | -0.632845 | -2.6232  | 5.00E-05 | 0.0014988 | yes |

|                 |                        |         |          |           |          |          |           |     |
|-----------------|------------------------|---------|----------|-----------|----------|----------|-----------|-----|
| <i>SLFN5</i>    | 17:33570085-33594768   | 16.5556 | 10.6747  | -0.633129 | -3.30911 | 5.00E-05 | 0.0014988 | yes |
| <i>FAM100B</i>  | 17:74261285-74267379   | 19.9963 | 12.8729  | -0.635393 | -3.38725 | 5.00E-05 | 0.0014988 | yes |
| <i>MMP14</i>    | 14:23305792-23316803   | 261.609 | 168.163  | -0.637552 | -3.16702 | 5.00E-05 | 0.0014988 | yes |
| <i>B4GALNT1</i> | 12:58013692-58026985   | 2.27319 | 1.45944  | -0.639303 | -2.36255 | 5.00E-05 | 0.0014988 | yes |
| <i>CBS</i>      | 21:44473300-44496472   | 48.3394 | 31.0152  | -0.640223 | -3.37073 | 5.00E-05 | 0.0014988 | yes |
| <i>CBWD2</i>    | 2:114195267-114253781  | 5.03122 | 3.22608  | -0.641127 | -3.02573 | 5.00E-05 | 0.0014988 | yes |
| <i>SUV420H1</i> | 11:67923506-67980784   | 14.6313 | 9.3711   | -0.642762 | -2.56728 | 1.00E-04 | 0.0027579 | yes |
| <i>YES1</i>     | 18:721591-812327       | 65.0004 | 41.6279  | -0.642897 | -3.71804 | 5.00E-05 | 0.0014988 | yes |
| <i>ZNF773</i>   | 19:58011308-58019526   | 3.91044 | 2.50093  | -0.644866 | -2.93826 | 5.00E-05 | 0.0014988 | yes |
| <i>IL1A</i>     | 2:113531491-113542971  | 163.675 | 104.671  | -0.644965 | -3.9398  | 5.00E-05 | 0.0014988 | yes |
| <i>DHX58</i>    | 17:40253421-40264751   | 1.48511 | 0.948273 | -0.647192 | -2.13489 | 0.00045  | 0.0095063 | yes |
| <i>AREG</i>     | 4:75310852-75320726    | 62.4318 | 39.8036  | -0.649383 | -4.16546 | 5.00E-05 | 0.0014988 | yes |
| <i>STYK1</i>    | 12:10771537-10826891   | 2.59731 | 1.65324  | -0.651723 | -2.81769 | 5.00E-05 | 0.0014988 | yes |
| <i>FLNB</i>     | 3:57994126-58157982    | 87.4559 | 55.6555  | -0.65203  | -1.59771 | 0.00285  | 0.0394402 | yes |
| <i>NAV3</i>     | 12:78225068-78606790   | 3.72487 | 2.3692   | -0.652791 | -3.2761  | 5.00E-05 | 0.0014988 | yes |
| <i>PCK2</i>     | 14:24563482-24573339   | 56.7589 | 36.0613  | -0.654395 | -3.18531 | 5.00E-05 | 0.0014988 | yes |
| <i>CRYL1</i>    | 13:20977805-21100012   | 9.18683 | 5.82957  | -0.656179 | -2.86221 | 5.00E-05 | 0.0014988 | yes |
| <i>COL17A1</i>  | 10:105791045-105845638 | 225.104 | 142.838  | -0.656213 | -3.05558 | 5.00E-05 | 0.0014988 | yes |
| <i>TCEAL3</i>   | X:102862833-102864855  | 42.1104 | 26.7001  | -0.657331 | -2.864   | 5.00E-05 | 0.0014988 | yes |
| <i>CHMP2A</i>   | 19:59062932-59066486   | 134.011 | 84.8717  | -0.658999 | -3.15134 | 5.00E-05 | 0.0014988 | yes |
| <i>PIR</i>      | X:15363712-15511711    | 7.72395 | 4.89072  | -0.659292 | -2.90705 | 5.00E-05 | 0.0014988 | yes |
| <i>LAMA3</i>    | 18:21269561-21535030   | 503.01  | 318.495  | -0.659317 | -3.10916 | 5.00E-05 | 0.0014988 | yes |
| <i>AKR1C1</i>   | 10:5005453-5020158     | 4.96249 | 3.14091  | -0.659882 | -2.85411 | 1.00E-04 | 0.0027579 | yes |
| <i>APOL2</i>    | 22:36622254-36636000   | 7.5833  | 4.79898  | -0.660097 | -2.82552 | 5.00E-05 | 0.0014988 | yes |
| <i>HCLS1</i>    | 3:121350245-121379791  | 29.1855 | 18.4528  | -0.661408 | -3.33572 | 5.00E-05 | 0.0014988 | yes |
| <i>FAM214B</i>  | 9:35104117-35115893    | 12.6787 | 8.00821  | -0.662859 | -3.25003 | 5.00E-05 | 0.0014988 | yes |
| <i>U2AF1L4</i>  | 19:36233427-36236336   | 8.31035 | 5.24452  | -0.664099 | -1.98511 | 7.00E-04 | 0.0135861 | yes |
| <i>SP100</i>    | 2:231280870-231410317  | 21.3882 | 13.49    | -0.664925 | -2.08154 | 0.00105  | 0.0185265 | yes |
| <i>TSPYL2</i>   | X:53111541-53117728    | 12.943  | 8.15767  | -0.665946 | -3.21424 | 5.00E-05 | 0.0014988 | yes |
| <i>KLHL24</i>   | 3:183353410-183402307  | 1.14936 | 0.72327  | -0.668227 | -3.05409 | 5.00E-05 | 0.0014988 | yes |
| <i>ACOXL</i>    | 2:111490149-111875799  | 2.56376 | 1.61252  | -0.66895  | -2.53846 | 5.00E-05 | 0.0014988 | yes |
| <i>CCDC92</i>   | 12:124420954-124457163 | 11.3951 | 7.15381  | -0.671629 | -4.12206 | 5.00E-05 | 0.0014988 | yes |
| <i>FKBP2</i>    | 11:64008412-64011607   | 110.003 | 69.0564  | -0.671702 | -3.14797 | 5.00E-05 | 0.0014988 | yes |
| <i>WNT5A</i>    | 3:55499742-55521670    | 3.26865 | 2.05044  | -0.672756 | -3.2193  | 5.00E-05 | 0.0014988 | yes |

|                   |                       |         |          |           |          |          |           |     |
|-------------------|-----------------------|---------|----------|-----------|----------|----------|-----------|-----|
| <i>S100A2</i>     | 1:153533583-153538306 | 4450.35 | 2788.18  | -0.674599 | -3.15841 | 5.00E-05 | 0.0014988 | yes |
| <i>GNG4</i>       | 1:235710984-235814054 | 1.07957 | 0.676079 | -0.675196 | -2.40127 | 5.00E-05 | 0.0014988 | yes |
| <i>LOC728392</i>  | 17:5402746-5404319    | 2.0649  | 1.28733  | -0.681688 | -2.2225  | 0.00145  | 0.0237491 | yes |
| <i>SPRY2</i>      | 13:80910110-80915086  | 30.4049 | 18.9316  | -0.683506 | -3.87704 | 5.00E-05 | 0.0014988 | yes |
| <i>ASNS</i>       | 7:97481428-97501854   | 71.9266 | 44.6845  | -0.68675  | -2.75886 | 5.00E-05 | 0.0014988 | yes |
| <i>OPLAH</i>      | 8:145106166-145115584 | 3.19177 | 1.98244  | -0.687084 | -3.28168 | 5.00E-05 | 0.0014988 | yes |
| <i>SLC46A3</i>    | 13:29274216-29293150  | 3.6682  | 2.27704  | -0.687914 | -3.33216 | 5.00E-05 | 0.0014988 | yes |
| <i>SLCO1B3</i>    | 12:20963637-21069845  | 7.28771 | 4.51923  | -0.689388 | -3.87541 | 5.00E-05 | 0.0014988 | yes |
| <i>IMPA1</i>      | 8:82569150-82598589   | 4.66807 | 2.89253  | -0.690494 | -1.92511 | 0.00185  | 0.0285536 | yes |
| <i>SP6</i>        | 17:45922279-45933240  | 3.90178 | 2.41434  | -0.692506 | -3.01646 | 5.00E-05 | 0.0014988 | yes |
| <i>HEPHL1</i>     | 11:93754377-93847374  | 3.50687 | 2.1696   | -0.692751 | -3.47195 | 5.00E-05 | 0.0014988 | yes |
| <i>CNTRL</i>      | 9:123850573-123939886 | 5.75766 | 3.55871  | -0.694128 | -3.81757 | 5.00E-05 | 0.0014988 | yes |
| <i>CCDC80</i>     | 3:112323406-112359977 | 4.38281 | 2.70725  | -0.695029 | -3.24714 | 5.00E-05 | 0.0014988 | yes |
| <i>CYYR1</i>      | 21:27778261-27945581  | 1.43936 | 0.885793 | -0.70039  | -2.31583 | 0.00015  | 0.0038882 | yes |
| <i>TSC22D3</i>    | X:106956450-107019017 | 35.5719 | 21.8567  | -0.702661 | -3.21616 | 5.00E-05 | 0.0014988 | yes |
| <i>PION</i>       | 7:76940067-77045717   | 1.40431 | 0.85978  | -0.707821 | -2.66088 | 0.00015  | 0.0038882 | yes |
| <i>ST6GALNAC2</i> | 17:74561460-74582145  | 16.1891 | 9.9051   | -0.708776 | -4.51205 | 5.00E-05 | 0.0014988 | yes |
| <i>ASS1</i>       | 9:133320093-133376661 | 8.32401 | 5.08808  | -0.710156 | -3.24331 | 5.00E-05 | 0.0014988 | yes |
| <i>FAM72D</i>     | 1:143896451-143913143 | 2.28817 | 1.3985   | -0.710311 | -2.95186 | 5.00E-05 | 0.0014988 | yes |
| <i>EML2</i>       | 19:46112657-46148775  | 24.7661 | 15.1159  | -0.712295 | -3.28682 | 5.00E-05 | 0.0014988 | yes |
| <i>GSN</i>        | 9:124030379-124095120 | 32.3344 | 19.7082  | -0.714278 | -2.23051 | 5.00E-05 | 0.0014988 | yes |
| <i>ARHGAP24</i>   | 4:86396283-86923823   | 2.93766 | 1.78497  | -0.718767 | -2.35495 | 0.00045  | 0.0095063 | yes |
| <i>MYEOV</i>      | 11:69061621-69064754  | 11.0972 | 6.73932  | -0.719522 | -3.60562 | 5.00E-05 | 0.0014988 | yes |
| <i>IRF9</i>       | 14:24630421-24635774  | 7.84092 | 4.73324  | -0.728194 | -3.47364 | 5.00E-05 | 0.0014988 | yes |
| <i>CDSN</i>       | 6:31082607-31107869   | 2.41706 | 1.45809  | -0.729173 | -2.40994 | 1.00E-04 | 0.0027579 | yes |
| <i>G0S2</i>       | 1:209848669-209849735 | 917.76  | 552.94   | -0.730994 | -5.36571 | 5.00E-05 | 0.0014988 | yes |
| <i>SRPX2</i>      | X:99899162-99926296   | 3.10962 | 1.87251  | -0.731765 | -2.92574 | 5.00E-05 | 0.0014988 | yes |
| <i>WIP1</i>       | 17:66417421-66453653  | 21.8343 | 13.086   | -0.738566 | -3.69327 | 5.00E-05 | 0.0014988 | yes |
| <i>SLC7A11</i>    | 4:138948575-139163503 | 17.1124 | 10.2485  | -0.739634 | -4.32513 | 5.00E-05 | 0.0014988 | yes |
| <i>PRDM8</i>      | 4:81106423-81125483   | 3.7949  | 2.26765  | -0.742863 | -3.47673 | 5.00E-05 | 0.0014988 | yes |
| <i>DHRS2</i>      | 14:24105572-24114848  | 4.43446 | 2.64922  | -0.743192 | -2.68534 | 5.00E-05 | 0.0014988 | yes |
| <i>ERN1</i>       | 17:62120389-62207502  | 3.32482 | 1.9833   | -0.745374 | -3.50626 | 5.00E-05 | 0.0014988 | yes |
| <i>B4GALNT3</i>   | 12:569542-671058      | 1.56788 | 0.934013 | -0.747298 | -2.66245 | 5.00E-05 | 0.0014988 | yes |
| <i>DQX1</i>       | 2:74745257-74753408   | 4.1141  | 2.45078  | -0.747334 | -3.35028 | 5.00E-05 | 0.0014988 | yes |



|                 |                        |          |          |           |          |          |           |     |
|-----------------|------------------------|----------|----------|-----------|----------|----------|-----------|-----|
| <i>CYP4F11</i>  | 19:16023179-16045676   | 4.09452  | 2.43784  | -0.748094 | -3.24949 | 5.00E-05 | 0.0014988 | yes |
| <i>SYNPO</i>    | 5:149980641-150038792  | 7.68435  | 4.57095  | -0.749428 | -1.55211 | 0.0034   | 0.0448528 | yes |
| <i>ANTXR2</i>   | 4:80822770-80994477    | 21.8188  | 12.9486  | -0.752773 | -3.77416 | 5.00E-05 | 0.0014988 | yes |
| <i>JHDM1D</i>   | 7:139784545-139876741  | 5.59228  | 3.314    | -0.754866 | -4.05797 | 5.00E-05 | 0.0014988 | yes |
| <i>ARG2</i>     | 14:68086578-68141602   | 16.2522  | 9.62049  | -0.75645  | -2.30228 | 9.00E-04 | 0.0166758 | yes |
| <i>LACC1</i>    | 13:44410487-44468068   | 3.20334  | 1.88013  | -0.768745 | -3.12375 | 5.00E-05 | 0.0014988 | yes |
| <i>STX16</i>    | 20:57226308-57290900   | 18.5483  | 10.8834  | -0.769153 | -2.26821 | 5.00E-05 | 0.0014988 | yes |
| <i>KRT34</i>    | 17:39533920-39538636   | 3.86316  | 2.26411  | -0.770838 | -3.2379  | 5.00E-05 | 0.0014988 | yes |
| <i>NDC80</i>    | 18:2571509-2616634     | 46.5117  | 27.2484  | -0.771421 | -4.93499 | 5.00E-05 | 0.0014988 | yes |
| <i>ROBO4</i>    | 11:124754113-124767831 | 0.804055 | 0.464884 | -0.790424 | -2.30141 | 5.00E-05 | 0.0014988 | yes |
| <i>GYLTL1B</i>  | 11:45943195-45950647   | 27.3975  | 15.8283  | -0.791539 | -4.74416 | 5.00E-05 | 0.0014988 | yes |
| <i>EIF3C</i>    | 16:28699878-28747051   | 4.85417  | 2.7956   | -0.796065 | -3.6339  | 5.00E-05 | 0.0014988 | yes |
| <i>COL5A2</i>   | 2:189896640-190044605  | 2.19652  | 1.26456  | -0.796586 | -3.61491 | 5.00E-05 | 0.0014988 | yes |
| <i>SESN2</i>    | 1:28585962-28609002    | 14.6739  | 8.41601  | -0.80204  | -4.20918 | 5.00E-05 | 0.0014988 | yes |
| <i>MYH15</i>    | 3:108099215-108248169  | 0.961994 | 0.548856 | -0.8096   | -3.18873 | 5.00E-05 | 0.0014988 | yes |
| <i>CHD3</i>     | 17:7788122-7816075     | 21.9642  | 12.5122  | -0.811818 | -2.47349 | 1.00E-04 | 0.0027579 | yes |
| <i>ALOXE3</i>   | 17:7999217-8022234     | 9.38195  | 5.3259   | -0.816863 | -4.13629 | 5.00E-05 | 0.0014988 | yes |
| <i>SERPINF1</i> | 17:1665258-1680859     | 4.90601  | 2.78217  | -0.818336 | -3.59047 | 5.00E-05 | 0.0014988 | yes |
| <i>HNRNPA1</i>  | 12:54674487-54679030   | 177.782  | 100.59   | -0.821615 | -1.60931 | 0.0013   | 0.0216115 | yes |
| <i>ACYP1</i>    | 14:75519923-75530736   | 12.4322  | 7.033    | -0.821866 | -2.1774  | 5.00E-05 | 0.0014988 | yes |
| <i>SIPA1</i>    | 11:65405577-65418391   | 2.21285  | 1.2495   | -0.824558 | -3.36938 | 5.00E-05 | 0.0014988 | yes |
| <i>ZPLD1</i>    | 3:102153858-102198685  | 0.721143 | 0.407047 | -0.825091 | -2.4908  | 7.00E-04 | 0.0135861 | yes |
| <i>IL13RA2</i>  | X:114238537-114252207  | 31.9291  | 17.9146  | -0.833734 | -5.56271 | 5.00E-05 | 0.0014988 | yes |
| <i>PAPLN</i>    | 14:73704204-73741348   | 2.47155  | 1.38198  | -0.838678 | -3.94407 | 5.00E-05 | 0.0014988 | yes |
| <i>H1FO</i>     | 22:38201113-38203443   | 85.9237  | 47.9586  | -0.841265 | -4.53003 | 5.00E-05 | 0.0014988 | yes |
| <i>YPEL2</i>    | 17:57409052-57479095   | 1.2747   | 0.7107   | -0.842844 | -3.11558 | 5.00E-05 | 0.0014988 | yes |
| <i>HDAC11</i>   | 3:13521714-13547924    | 4.41412  | 2.45681  | -0.845337 | -2.0751  | 1.00E-04 | 0.0027579 | yes |
| <i>LAMC2</i>    | 1:183155173-183214262  | 2000.92  | 1108.5   | -0.852051 | -3.24764 | 5.00E-05 | 0.0014988 | yes |
| <i>MFAP2</i>    | 1:17300996-17308081    | 29.642   | 16.421   | -0.852102 | -2.43506 | 5.00E-05 | 0.0014988 | yes |
| <i>CUL7</i>     | 6:43005354-43021683    | 1.60514  | 0.889052 | -0.852356 | -1.70246 | 0.00265  | 0.0373042 | yes |
| <i>CCDC159</i>  | 19:11457180-11465620   | 3.20642  | 1.77201  | -0.855573 | -2.91795 | 0.00015  | 0.0038882 | yes |
| <i>ABCA1</i>    | 9:107543282-107690527  | 1.13398  | 0.626525 | -0.855957 | -3.92129 | 5.00E-05 | 0.0014988 | yes |
| <i>TEF</i>      | 22:41763336-41795332   | 2.1099   | 1.1631   | -0.859199 | -3.48838 | 5.00E-05 | 0.0014988 | yes |
| <i>MAP4K3</i>   | 2:39476406-39664453    | 10.7082  | 5.9021   | -0.85941  | -2.46125 | 5.00E-05 | 0.0014988 | yes |

|                  |                        |          |          |           |          |          |           |     |
|------------------|------------------------|----------|----------|-----------|----------|----------|-----------|-----|
| <i>CCDC11</i>    | 18:47753562-47792865   | 0.879509 | 0.482058 | -0.86749  | -2.00467 | 0.0032   | 0.0433186 | yes |
| <i>ISG20</i>     | 15:89182038-89198879   | 18.2294  | 9.98287  | -0.86874  | -4.67091 | 5.00E-05 | 0.0014988 | yes |
| <i>MICAL1</i>    | 6:109765264-109777190  | 7.18972  | 3.93314  | -0.870255 | -1.82341 | 0.001    | 0.0178882 | yes |
| <i>CSF3</i>      | 17:38171613-38174066   | 21.0238  | 11.4515  | -0.876486 | -2.03465 | 0.00165  | 0.0260097 | yes |
| <i>GADD45A</i>   | 1:68150859-68154021    | 84.5383  | 46.0015  | -0.877925 | -2.73782 | 5.00E-05 | 0.0014988 | yes |
| <i>TRAK1</i>     | 3:42132745-42267382    | 5.9001   | 3.19108  | -0.886695 | -1.82347 | 0.00095  | 0.0173333 | yes |
| <i>ABCC2</i>     | 10:101542462-101611662 | 0.734726 | 0.396466 | -0.89001  | -2.76713 | 5.00E-05 | 0.0014988 | yes |
| <i>CD68</i>      | 17:7482804-7485429     | 31.1735  | 16.8033  | -0.891575 | -1.88761 | 0.00065  | 0.0128896 | yes |
| <i>SERPIN2</i>   | 18:61554938-61571124   | 34.5487  | 18.4371  | -0.906014 | -4.64008 | 5.00E-05 | 0.0014988 | yes |
| <i>ROS1</i>      | 6:117609529-117747018  | 1.36334  | 0.723137 | -0.914806 | -4.04714 | 5.00E-05 | 0.0014988 | yes |
| <i>ABCG1</i>     | 21:43619798-43717354   | 4.98162  | 2.63583  | -0.91836  | -1.78382 | 0.00095  | 0.0173333 | yes |
| <i>SLCO1B7</i>   | 12:21168629-21243040   | 1.44456  | 0.760386 | -0.925828 | -2.9211  | 0.00015  | 0.0038882 | yes |
| <i>IGFBP3</i>    | 7:45951843-45960871    | 20.9539  | 11.0106  | -0.928327 | -5.02593 | 5.00E-05 | 0.0014988 | yes |
| <i>GJB4</i>      | 1:35225341-35229325    | 8.23412  | 4.26667  | -0.948502 | -4.32528 | 5.00E-05 | 0.0014988 | yes |
| <i>FABP4</i>     | 8:82390731-82395473    | 3.99287  | 2.06767  | -0.949421 | -3.27104 | 0.00015  | 0.0038882 | yes |
| <i>BCAM</i>      | 19:45312315-45324678   | 7.68736  | 3.96752  | -0.954252 | -2.07373 | 0.00155  | 0.0248368 | yes |
| <i>GABARAPL1</i> | 12:10365488-10375727   | 15.3138  | 7.88058  | -0.958463 | -4.73969 | 5.00E-05 | 0.0014988 | yes |
| <i>RHBDL2</i>    | 1:39351478-39407456    | 2.95854  | 1.52237  | -0.958565 | -3.45079 | 5.00E-05 | 0.0014988 | yes |
| <i>CLTCL1</i>    | 22:19166985-19279239   | 6.64652  | 3.41369  | -0.961266 | -3.85778 | 5.00E-05 | 0.0014988 | yes |
| <i>MMP2</i>      | 16:55513080-55540586   | 8.15658  | 4.18692  | -0.962076 | -3.3089  | 5.00E-05 | 0.0014988 | yes |
| <i>INHBA</i>     | 7:41728600-41818976    | 76.8846  | 39.3528  | -0.966226 | -5.42862 | 5.00E-05 | 0.0014988 | yes |
| <i>IFI44</i>     | 1:79115476-79129763    | 1.61604  | 0.824035 | -0.97169  | -2.93461 | 1.00E-04 | 0.0027579 | yes |
| <i>MAPKAPK5</i>  | 12:112277572-112331228 | 12.9663  | 6.6097   | -0.972115 | -2.15924 | 0.00095  | 0.0173333 | yes |
| <i>TCEAL1</i>    | X:102883647-102885881  | 12.1369  | 6.17248  | -0.975478 | -4.71068 | 5.00E-05 | 0.0014988 | yes |
| <i>CD164L2</i>   | 1:27705595-27709805    | 0.947306 | 0.480816 | -0.978347 | -2.08063 | 0.0026   | 0.036767  | yes |
| <i>A4GALT</i>    | 22:43088126-43116876   | 3.3332   | 1.68825  | -0.981385 | -3.84066 | 5.00E-05 | 0.0014988 | yes |
| <i>SCRN1</i>     | 7:29959718-30029905    | 21.1962  | 10.7325  | -0.981821 | -1.8934  | 0.00035  | 0.0077304 | yes |
| <i>WIBG</i>      | 12:56295196-56321697   | 19.0869  | 9.65815  | -0.982761 | -1.89593 | 0.001    | 0.0178882 | yes |
| <i>BTN2A1</i>    | 6:26458152-26482737    | 6.3923   | 3.2131   | -0.992368 | -2.25175 | 0.00045  | 0.0095063 | yes |
| <i>MLLT11</i>    | 1:151032150-151040973  | 17.081   | 8.5845   | -0.992585 | -5.24118 | 5.00E-05 | 0.0014988 | yes |
| <i>ITGA6</i>     | 2:173292313-173371181  | 119.755  | 60.0594  | -0.995628 | -2.43737 | 0.00035  | 0.0077304 | yes |
| <i>SLC24A1</i>   | 15:65914269-65948598   | 2.15749  | 1.07885  | -0.999862 | -2.10517 | 0.0011   | 0.0190409 | yes |
| <i>MMP1</i>      | 11:102654406-102714342 | 315.565  | 157.307  | -1.00435  | -4.96135 | 5.00E-05 | 0.0014988 | yes |
| <i>CHAC1</i>     | 15:41245635-41248717   | 34.4459  | 17.1093  | -1.00955  | -4.12393 | 5.00E-05 | 0.0014988 | yes |

|                  |                        |          |          |          |          |          |           |     |
|------------------|------------------------|----------|----------|----------|----------|----------|-----------|-----|
| <i>PLK1S1</i>    | 20:21106623-21227260   | 11.1298  | 5.52514  | -1.01034 | -1.78192 | 0.00255  | 0.0361588 | yes |
| <i>C12orf39</i>  | 12:21679255-21684210   | 4.44195  | 2.18857  | -1.0212  | -3.46472 | 7.00E-04 | 0.0135861 | yes |
| <i>SERPINB1</i>  | 6:2832565-2842283      | 13.5232  | 6.64245  | -1.02564 | -3.83102 | 5.00E-05 | 0.0014988 | yes |
| <i>BIRC3</i>     | 11:102188180-102210134 | 1.03533  | 0.507233 | -1.02937 | -3.75978 | 5.00E-05 | 0.0014988 | yes |
| <i>PCED1B</i>    | 12:47602202-47630443   | 2.14427  | 1.0421   | -1.04099 | -3.02531 | 5.00E-05 | 0.0014988 | yes |
| <i>MYCBPAP</i>   | 17:48585744-48608862   | 1.29606  | 0.628543 | -1.04405 | -3.28943 | 5.00E-05 | 0.0014988 | yes |
| <i>IL31RA</i>    | 5:55147206-55218682    | 3.33406  | 1.61217  | -1.04828 | -2.00446 | 0.00105  | 0.0185265 | yes |
| <i>GSDMC</i>     | 8:130760441-130799134  | 4.48774  | 2.16705  | -1.05026 | -4.80189 | 5.00E-05 | 0.0014988 | yes |
| <i>PNLIPRP3</i>  | 10:118187423-118237469 | 10.9741  | 5.25503  | -1.06233 | -5.66724 | 5.00E-05 | 0.0014988 | yes |
| <i>CPA6</i>      | 8:68334404-68658620    | 1.00978  | 0.483417 | -1.06269 | -2.64453 | 0.00025  | 0.0059445 | yes |
| <i>COL22A1</i>   | 8:139600477-139926236  | 1.38787  | 0.663474 | -1.06476 | -4.11567 | 5.00E-05 | 0.0014988 | yes |
| <i>DHRS9</i>     | 2:169921298-169952677  | 3.03765  | 1.44017  | -1.07672 | -3.23992 | 5.00E-05 | 0.0014988 | yes |
| <i>C5orf4</i>    | 5:154198051-154230213  | 1.88399  | 0.885603 | -1.08906 | -3.53688 | 5.00E-05 | 0.0014988 | yes |
| <i>PIK3IP1</i>   | 22:31677578-31688520   | 2.91647  | 1.3709   | -1.0891  | -2.99468 | 5.00E-05 | 0.0014988 | yes |
| <i>ECM1</i>      | 1:150480486-150486265  | 18.52    | 8.65988  | -1.09666 | -4.75528 | 5.00E-05 | 0.0014988 | yes |
| <i>PLD2</i>      | 17:4710395-4726727     | 7.7611   | 3.62114  | -1.09982 | -3.64287 | 5.00E-05 | 0.0014988 | yes |
| <i>GADD45A</i>   | 1:68150859-68154021    | 62.5498  | 29.0023  | -1.10884 | -3.01854 | 5.00E-05 | 0.0014988 | yes |
| <i>CTH</i>       | 1:70876900-70905534    | 10.4532  | 4.80291  | -1.12197 | -5.02422 | 5.00E-05 | 0.0014988 | yes |
| <i>DLX2</i>      | 2:172964165-172967478  | 1.36419  | 0.624026 | -1.12837 | -3.65081 | 5.00E-05 | 0.0014988 | yes |
| <i>HIST2H2BE</i> | 1:149856009-149858232  | 1.49685  | 0.683616 | -1.13067 | -3.55863 | 5.00E-05 | 0.0014988 | yes |
| <i>ADM2</i>      | 22:50919984-50924866   | 4.51419  | 2.0505   | -1.13849 | -4.80554 | 5.00E-05 | 0.0014988 | yes |
| <i>NNMT</i>      | 11:114166534-114183238 | 15.3584  | 6.92833  | -1.14845 | -5.84285 | 5.00E-05 | 0.0014988 | yes |
| <i>TREM2</i>     | 6:41126245-41130922    | 4.07401  | 1.82905  | -1.15536 | -3.78976 | 5.00E-05 | 0.0014988 | yes |
| <i>CARD11</i>    | 7:2945708-3083509      | 2.18828  | 0.979639 | -1.15947 | -4.96424 | 5.00E-05 | 0.0014988 | yes |
| <i>PANX2</i>     | 22:50609159-50618724   | 1.66095  | 0.740022 | -1.16637 | -3.02391 | 5.00E-05 | 0.0014988 | yes |
| <i>SLPI</i>      | 20:43880878-43883206   | 115.877  | 51.3826  | -1.17324 | -8.33286 | 5.00E-05 | 0.0014988 | yes |
| <i>RBP5</i>      | 12:7276279-7281466     | 1.94083  | 0.848268 | -1.19408 | -2.8342  | 3.00E-04 | 0.0068401 | yes |
| <i>CYP1A1</i>    | 15:75011882-75017877   | 4.58866  | 1.9755   | -1.21586 | -5.25167 | 5.00E-05 | 0.0014988 | yes |
| <i>SMOX</i>      | 20:4129425-4168394     | 13.1499  | 5.65638  | -1.2171  | -1.75273 | 0.0011   | 0.0190409 | yes |
| <i>SBSN</i>      | 19:36014268-36019253   | 0.71008  | 0.305336 | -1.21759 | -1.60796 | 0.00215  | 0.0316727 | yes |
| <i>GRAMD2</i>    | 15:72452146-72490136   | 0.894564 | 0.384642 | -1.21767 | -3.11199 | 5.00E-05 | 0.0014988 | yes |
| <i>SLITRK6</i>   | 13:86366921-86373483   | 6.18184  | 2.65308  | -1.22037 | -6.82586 | 5.00E-05 | 0.0014988 | yes |
| <i>FAP</i>       | 2:163027199-163100045  | 2.77603  | 1.18857  | -1.22379 | -5.24121 | 5.00E-05 | 0.0014988 | yes |
| <i>NLRP1</i>     | 17:5404718-5487832     | 7.22071  | 3.03784  | -1.24909 | -2.1232  | 5.00E-05 | 0.0014988 | yes |

|                  |                        |          |          |          |          |          |           |     |
|------------------|------------------------|----------|----------|----------|----------|----------|-----------|-----|
| <i>UBXN6</i>     | 19:4445002-4457791     | 17.4659  | 7.34694  | -1.24932 | -2.43296 | 5.00E-05 | 0.0014988 | yes |
| <i>NR1D1</i>     | 17:38218445-38256973   | 5.07138  | 2.11555  | -1.26135 | -4.22313 | 5.00E-05 | 0.0014988 | yes |
| <i>KRT16</i>     | 17:39766029-39769079   | 7.71597  | 3.18501  | -1.27655 | -5.4617  | 5.00E-05 | 0.0014988 | yes |
| <i>FAM110C</i>   | 2:38813-46588          | 31.3762  | 12.6361  | -1.31212 | -7.72089 | 5.00E-05 | 0.0014988 | yes |
| <i>HECW2</i>     | 2:197063976-197457335  | 5.3161   | 2.12882  | -1.32032 | -6.51419 | 5.00E-05 | 0.0014988 | yes |
| <i>MMP10</i>     | 11:102641232-102651359 | 8.63648  | 3.44215  | -1.32713 | -6.37841 | 5.00E-05 | 0.0014988 | yes |
| <i>NF1</i>       | 17:29421944-29704695   | 3.73087  | 1.47064  | -1.34307 | -1.96511 | 0.00025  | 0.0059445 | yes |
| <i>CFLAR</i>     | 2:201980876-202037411  | 5.68562  | 2.22132  | -1.3559  | -2.18169 | 0.00255  | 0.0361588 | yes |
| <i>P4HA3</i>     | 11:73977701-74022699   | 0.871639 | 0.338822 | -1.3632  | -2.90364 | 5.00E-05 | 0.0014988 | yes |
| <i>LRP8</i>      | 1:53692563-53793821    | 2.96633  | 1.15294  | -1.36336 | -2.03887 | 0.0015   | 0.0242609 | yes |
| <i>HELZ2</i>     | 20:62189438-62205592   | 1.65416  | 0.638386 | -1.37359 | -1.92922 | 0.0011   | 0.0190409 | yes |
| <i>CGB8</i>      | 19:49550894-49552368   | 4.25631  | 1.63643  | -1.37905 | -4.55213 | 5.00E-05 | 0.0014988 | yes |
| <i>RBFOX2</i>    | 22:36134782-36424585   | 7.28385  | 2.78283  | -1.38815 | -1.69218 | 0.0012   | 0.0202526 | yes |
| <i>TMEM200A</i>  | 6:130687425-130764212  | 2.5015   | 0.943009 | -1.40745 | -5.03664 | 5.00E-05 | 0.0014988 | yes |
| <i>FUT3</i>      | 19:5842898-5851485     | 1.49309  | 0.545674 | -1.45219 | -3.04356 | 5.00E-05 | 0.0014988 | yes |
| <i>ST3GAL5</i>   | 2:86066270-86116157    | 1.62025  | 0.577169 | -1.48915 | -2.08903 | 0.00235  | 0.0339427 | yes |
| <i>CDC25B</i>    | 20:3776400-3786762     | 9.00604  | 3.18781  | -1.49833 | -1.81435 | 0.0037   | 0.0476763 | yes |
| <i>SULT1B1</i>   | 4:70592685-70626430    | 3.40795  | 1.18532  | -1.52363 | -5.10759 | 5.00E-05 | 0.0014988 | yes |
| <i>TMPRSS11D</i> | 4:68686593-68749716    | 2.33776  | 0.811374 | -1.52669 | -5.89927 | 5.00E-05 | 0.0014988 | yes |
| <i>HNRNPL</i>    | 19:39327027-39342979   | 45.9045  | 15.4916  | -1.56714 | -2.20611 | 0.00075  | 0.0143591 | yes |
| <i>ARHGAP22</i>  | 10:49654067-49864310   | 6.89137  | 2.32199  | -1.56943 | -2.33307 | 0.00025  | 0.0059445 | yes |
| <i>TRIML2</i>    | 4:189012426-189026408  | 1.45103  | 0.485152 | -1.58057 | -3.44536 | 1.00E-04 | 0.0027579 | yes |
| <i>HIST1H2BC</i> | 6:26123694-26124132    | 6.90237  | 2.28295  | -1.59619 | -5.4108  | 0.00035  | 0.0077304 | yes |
| <i>MFGE8</i>     | 15:89441913-89456663   | 7.33387  | 2.31398  | -1.6642  | -2.34885 | 0.00085  | 0.0159588 | yes |
| <i>WNT9A</i>     | 1:228109164-228135676  | 1.92597  | 0.599078 | -1.68477 | -3.3791  | 5.00E-05 | 0.0014988 | yes |
| <i>HIST1H2AC</i> | 6:26124372-26124918    | 9.41093  | 2.86733  | -1.71463 | -6.90476 | 5.00E-05 | 0.0014988 | yes |
| <i>PODXL</i>     | 7:131185020-131241376  | 12.8792  | 3.91665  | -1.71734 | -5.2702  | 5.00E-05 | 0.0014988 | yes |
| <i>DBNDD2</i>    | 20:43990576-44039250   | 12.3766  | 3.15246  | -1.97307 | -2.6356  | 2.00E-04 | 0.004937  | yes |
| <i>PI3</i>       | 20:43803539-43805185   | 12.3452  | 3.07659  | -2.00455 | -8.25761 | 5.00E-05 | 0.0014988 | yes |
| <i>ESM1</i>      | 5:54273694-54281414    | 4.79714  | 1.16881  | -2.03713 | -4.59778 | 5.00E-05 | 0.0014988 | yes |
| <i>GCKR</i>      | 2:27719705-27746551    | 0.697007 | 0.164866 | -2.07988 | -2.98657 | 1.00E-04 | 0.0027579 | yes |
| <i>PODXL</i>     | 7:131185020-131241376  | 3.46337  | 0.781345 | -2.14814 | -2.00564 | 0.00215  | 0.0316727 | yes |
| <i>SPRR1B</i>    | 1:153003678-153005376  | 12.871   | 2.31228  | -2.47673 | -9.84412 | 5.00E-05 | 0.0014988 | yes |
| <i>MMP9</i>      | 20:44637546-44688789   | 1.03792  | 0.18009  | -2.52691 | -4.42767 | 5.00E-05 | 0.0014988 | yes |

S100A8 1:153362507-153363664 4.80332 0.824391 -2.54263 -5.72205 0.00035 0.0077304 yes
